# Supplementary material for: Physical activity among HIV-positive patients receiving antiretroviral therapy in Hanoi and Nam Dinh, Vietnam: a cross-sectional study
Source: PubMed Central journal article supplement — BMJ Open. 2018 May 10;8(5):e020688. doi: 10.1136/bmjopen-2017-020688 (PMC5950700; doi:10.1136/bmjopen-2017-020688), 2018-05-10
Supplement: bmjopen-2017-020688.draft_revisions.pdf [file bmjopen-2017-020688.draft_revisions.pdf]

# BMJ Open

BMJ Open is committed to open peer review. As part of this commitment we make the peer review history of every article we publish publicly available.

When an article is published we post the peer reviewers' comments and the authors' responses online. We also post the versions of the paper that were used during peer review. These are the versions that the peer review comments apply to.

The versions of the paper that follow are the versions that were submitted during the peer review process. They are not the versions of record or the final published versions. They should not be cited or distributed as the published version of this manuscript.

BMJ Open is an open access journal and the full, final, typeset and author-corrected version of record of the manuscript is available on our site with no access controls, subscription charges or pay-per-view fees (<http://bmjopen.bmj.com>).

If you have any questions on BMJ Open's open peer review process please email [info.bmjopen@bmj.com](mailto:info.bmjopen@bmj.com)

# BMJ Open

## Physical activity among HIV-positive patients receiving antiretroviral therapy

|                               |                                                                                                                                                                                                                                                                                                                                                                                                                                                                               |
|-------------------------------|-------------------------------------------------------------------------------------------------------------------------------------------------------------------------------------------------------------------------------------------------------------------------------------------------------------------------------------------------------------------------------------------------------------------------------------------------------------------------------|
| Journal:                      | <i>BMJ Open</i>                                                                                                                                                                                                                                                                                                                                                                                                                                                               |
| Manuscript ID                 | bmjopen-2017-020688                                                                                                                                                                                                                                                                                                                                                                                                                                                           |
| Article Type:                 | Research                                                                                                                                                                                                                                                                                                                                                                                                                                                                      |
| Date Submitted by the Author: | 16-Nov-2017                                                                                                                                                                                                                                                                                                                                                                                                                                                                   |
| Complete List of Authors:     | Dang, Anh; Institute for Preventive Medicine and Public Health, Hanoi Medical University<br>Nguyen, Long; School of Medicine and Pharmacy, Vietnam National University<br>Tran, Tung; Dai Hoc Duy Tan,<br>Nguyen, Anh; Johns Hopkins University, School of Medicine<br>Xuan Bach, Tran; Institute for Preventive Medicine and Public Health, Hanoi Medical University, Health Economics<br>Latkin, Carl; Johns Hopkins School of Public Health, Health, Behavior, and Society |
| Keywords:                     | physical activity, antiretroviral therapy, hiv/aids, Vietnam                                                                                                                                                                                                                                                                                                                                                                                                                  |
|                               |                                                                                                                                                                                                                                                                                                                                                                                                                                                                               |

SCHOLARONE™  
Manuscripts

1  
2  
3 **Physical activity among HIV-positive patients receiving**  
4 **antiretroviral therapy**  
5  
6  
7

8 Anh Kim Dang<sup>1</sup>, Long Hoang Nguyen<sup>2</sup>, Anh Quynh Nguyen<sup>3</sup>, Bach Xuan Tran<sup>1,4</sup>,  
9 Tung Thanh Tran<sup>5</sup>, Carl A. Latkin<sup>4</sup>  
10

11 <sup>1</sup> Institute for Preventive Medicine and Public Health, Hanoi Medical University,  
12 Hanoi, Vietnam  
13

14 <sup>2</sup> School of Medicine and Pharmacy, Vietnam National University, Hanoi, Vietnam  
15

16 <sup>3</sup> School of Medicine, Johns Hopkins University, Baltimore, MD, USA  
17

18 <sup>4</sup> Bloomberg School of Public Health, Johns Hopkins University, Baltimore, MD, USA  
19

20 <sup>5</sup> Institute for Global Health Innovations, Duy Tan University, Da Nang, Vietnam  
21  
22  
23  
24  
25  
26  
27  
28  
29  
30  
31

32 Corresponding author:  
33 Tung Thanh Tran,  
34 Institute for Global Health Innovations,  
35 Duy Tan University, Da Nang, Vietnam, 550000  
36 Email: tung.ighi@gmail.com  
37  
38  
39  
40  
41  
42  
43  
44  
45  
46  
47  
48  
49  
50  
51  
52  
53  
54  
55  
56  
57  
58  
59  
60

## Abstract

**Objectives:** Antiretroviral therapy (ART) has now turned HIV infection to a chronic disease, requiring patients to adhere to medications along with keeping a healthy life style. Increasing physical activity is recommended to maintain health among HIV-positive patients. This study aimed to determine the physical activity level and its associated factors among HIV patients receiving ART treatment.

**Settings:** 8 outpatient clinic sites in different levels of health systems in both rural and urban settings in Hanoi and Nam Dinh.

**Participants:** 1,133 HIV patients receiving ART treatment in the settings during the study period.

**Primary and secondary outcome measures:** Physical activity was measured using the International Physical Activity Questionnaire (IPAQ). Socio-economic, health-related quality of life, ART adherence, ART-related characteristics and peer supports were self-reported.

**Result:** About 16% of participants were inactive, 68% were health enhancing physical activity (HEPA) active. Rural patients reported a higher level of physical activity compared to urban patients. Changes in the physical activity level during ART treatment were non-linear. Respondents were more likely to have a higher IPAQ-score and classify as active in physical activity if they were female, self-employed and blue-collar workers/farmers. Respondents having a higher CD4 cell count, higher EQ-5D-5L index/EQ-VAS, and shared their health status with their peers were more likely to have higher IPAQ score or be active in physical activity. A lower IPAQ-score was associated with living in urban areas and being at the symptomatic stage. In addition, respondents who had poor adherence and higher duration of ART were more likely to be inactive in physical activity.

**Conclusion:** The majority of participants on ART were physically active. Interventions to promote physical activity among PLWH in urban areas and in later ART treatment are needed. Peer support and job guidance hold potentials in supporting to enhance the level of physical activity.

**Keywords:** Physical activity, antiretroviral therapy, HIV/AIDS, Vietnam

### Strengths and limitations

- The study included large sample size of HIV-infected patients receiving antiretroviral therapy treatment across different levels of health systems placed in both rural and urban areas.
- The study employed validated international instruments to increase the comparability between our results and other studies in elsewhere.
- The IPAQ was an objectively self-reported measure that may under- or over-estimate the physical activity of PLWH.
- Convenience sampling technique was used and this may limit the generalizability of findings as well as representative of HIV/AIDS population.
- The causal inference between level of physical activity and number of CD4 cells, quality of life could not be established due to the cross-sectional design.

## Introduction

The use of highly active antiretroviral therapy (HAART) have achieved significant milestones in reduction of HIV/AIDS- related morbidity and mortality. According to the UNAIDS report in 2016, among 36.7 million people living with HIV (PLWH), an estimated 19.5 million patients had access to life-saving antiretroviral medicines and the global coverage of ART reached 53%<sup>1</sup>. PLWH taking potent combination antiretroviral (ARV) drug regimen lived longer and had healthier lives<sup>1</sup>, which may transform HIV/AIDS into a chronic disease<sup>2</sup>. However, one of the most common adverse health effects of ART among PLWH was lipodystrophy syndrome<sup>3</sup> including morphologic (peripheral lipoatrophy and central fat accumulation) and metabolic (hyper-triglyceridaemia, hyper-cholesterolaemia, insulin resistance, type 2 diabetes, lactic acidaemia) symptoms<sup>4 5</sup>. It contributes to an increase in the risk of cardiovascular and other non-communicable diseases as a result of changes in adipose tissue distribution and metabolism<sup>6 7</sup>. These side-effects were also found to be the main reasons for non-adherence to antiretroviral medication and discontinuing the therapy<sup>8 9</sup>.

Since ART is requisite for viral suppression and recovering immune system, strategies which prevent these adverse effects and achieve optimization of treatment should be adopted<sup>10 11</sup>. Physical activity was recommended as a non-pharmacological treatment and alternative intervention<sup>12</sup>. Physical activity is defined as the movement of body that works skeletal muscles and expend more energy than resting<sup>13</sup>. Physical activity has been shown to increase functional capacity, muscle strength, joint flexibility, endurance and energy among people living with HIV<sup>14 15</sup>. Physical activity reduces the incidents of chronic diseases such as cardiovascular disease by lowering blood pressure in hypertensive patients and improving lipid lipoprotein profiles<sup>16-18</sup>; diabetes by improving glucose homeostasis<sup>19</sup>; and breast cancer<sup>20 21</sup>. Physical activity can also reverse metabolic and body composition change by lowering visceral and subcutaneous fat in the center of the body and increasing diameter of the peripheral parts, therefore prevent lipodystrophy<sup>22 23</sup>.

Engaging in physical activities is a very important health- related behavior, particularly among PLWH because they are often not motivated to do physical activity<sup>24</sup>. A typical physical activity guideline for normal adults is that they should have a minimum of 150 minutes of moderate-intensity or 75 minutes of vigorous-intensity physical activity each week or an equivalent combination of both moderate- and vigorous-intensity activity<sup>25</sup>. Center for Disease Control and Prevention (CDC) suggests that PLWH should comply at least with this guideline to keep healthy<sup>26</sup>. However, in developing countries, the rates of physical inactivity have been shown to be more than 50% among PLWH<sup>27 28</sup> as compared to about one fourth in the United States and Australia<sup>29 30</sup>. The differences depend on various factors such as gender, age groups, occupations, level of CD4 cell count and quality of life<sup>27 28 30</sup>.

In Vietnam, most previous studies were focused on physical activity among Vietnamese adolescents<sup>31 32</sup> and adults with chronic diseases and metabolic syndrome<sup>33 34</sup>. A previous study by Tan Bui et al found that 70% of the population met the WHO recommendations of physical activity for 18 to 64-year-old adults<sup>35</sup>. Besides, the socioeconomic and geographical differences were considered as factors that shape behavior in physical activity. Prior studies revealed that physical

1  
2  
3 activity was greater in male compared to female<sup>35</sup> and among people who had lower  
4 educational attainment<sup>36</sup>. In addition, level of physical activity in rural areas was  
5 significantly higher than in urban settings due to the modern transport system and  
6 sedentary behavior in urbanization<sup>35 37</sup>. A national representative survey with more  
7 than 14700 participants in 2010 indicated that provinces with higher urban population  
8 proportions had less proportion of active people<sup>38</sup>. Nonetheless, the rate of  
9 urbanization in Vietnam has been escalating in the recent years, from 21% in 2008  
10 to 32% in 2013 and is projected to reach 45% in 2020<sup>39</sup>. These changes raise the  
11 needs of understanding the potential variability of the prevalence of physical activity  
12 or inactivity between rural and urban settings, especially among people with chronic  
13 illness states such as HIV/AIDS and non-communicable diseases.  
14

15  
16 Vietnam is still in concentrated HIV epidemic stage and the proportion of ART  
17 coverage estimated approximately 42% (of people living with HIV/AIDS) in 2015<sup>40</sup>,  
18 and half of them has been undergoing ART for a long time. To reduce risk of chronic  
19 diseases and enhance the effectiveness of ART treatment, physical activity plays a  
20 requisite role in potential intervention strategies. However, little attention paid to  
21 determine the degree of physical activity and intervention to enhance physical  
22 activity among individuals with HIV infection in Vietnam, particularly between urban  
23 and rural areas. According to the Vietnam Constitution 2013, an urban area is  
24 defined as settlements with a high population density and built environment, while a  
25 rural area refers to places that have a low population density and are located outside  
26 urban settings, where people mostly work in the agriculture sector<sup>41</sup>. Based on the  
27 literature, we hypothesized that PLWH in urban area had lower level of physical  
28 activity compared to their counterparts. This study aimed to assess the level of  
29 physical activity and examine the factors associated with physically active among  
30 HIV patients receiving ART treatment across different levels of health systems and in  
31 both rural and urban settings.  
32  
33

## 34 **Methods**

### 35 **Study setting and subjects**

36 A cross-sectional study was performed from January to August 2013 in Hanoi and  
37 Nam Dinh, two Vietnamese epicenters providing HIV/AIDS surveillance and  
38 treatment services in the north of Vietnam. The study was performed at 8 outpatient  
39 clinics: 5 in Hanoi and 3 in Nam Dinh. There were one national hospital (Bach Mai  
40 Hospital), one provincial hospital (Nam Dinh provincial hospital), one provincial  
41 center (Nam Dinh Provincial AIDS Control Centre) and five district health centers  
42 (Hoang Mai, Long Bien, Dong Anh, Ha Dong, Xuan Truong). The eligibility criteria for  
43 selecting outpatient clinic sites in Hanoi and Nam Dinh included: 1) being  
44 representative of public health system in Vietnam which contains central-, provincial-  
45 and district- levels); 2) being able to afford ART service implemented following the  
46 official guidelines of the Vietnamese Ministry of Health<sup>42</sup>.  
47  
48

49 Patients were recruited using convenience sampling technique if they met the  
50 following eligibility criteria: 1) being 18 years old or above; 2) receiving ART  
51 treatment from those clinics mentioned above; 3) having a confirmatory testing of  
52 HIV-positive; 4) agreeing to participate in the study; 5) Be able to communicate with  
53 the data collectors normally. The exclusive criteria included those being suffered  
54 from serious illness during the recruitment process. We approached patients when  
55 they visited clinics for taking medication or receiving counseling. Based on the health  
56  
57  
58  
59  
60

1  
2  
3 staff's feedback, we identified eligible patients for the study. These patients were  
4 invited into a small counseling room by well trained health workers. They were  
5 introduced to the purpose of study, the benefits and drawbacks of participating, and  
6 were then asked to join the study. If they agreed, patients signed a written informed  
7 consent. We ensured patients of the confidentiality of their participation in the study.  
8 The consent process took place in a comfortable room with restricted access,  
9 allowing patients privacy as they decided whether or not to join the project. A total of  
10 1,133 patients agreed to enroll in this study. The response rate was 80-90% across  
11 different clinics. Patients refused to participate in the study because they had  
12 insufficient physical health, felt discomfort or had busy work.  
13

### 14 **Measures and instruments**

15  
16 Patients were invited to participate in 20-minute face-to-face interviews, conducting  
17 by data collectors who were medical students at Hanoi Medical University and  
18 experts in HIV-related fields. We did not involve health staff in collecting data to  
19 avoid social desirability bias. We developed a structured questionnaire with following  
20 information:  
21

#### 22 **Socioeconomic characteristics**

23 We asked patients to report their socioeconomic information included gender  
24 (male/female), education attainment (illiterate/ elementary/ secondary/ high school/  
25 vocational training/ university), age, marital status (single/ live with spouse/ live with  
26 partner/ divorced/ widow), religion (cult of ancestors/ Buddhism/ Catholic/  
27 Protestant), and employment status (Unemployed/ Self-employed/ White-collar/  
28 Blue-collar or farmer/ Others).  
29  
30

#### 31 **ART – related characteristics**

32 Self-reports about the latest CD4 cell count, HIV stages and ART treatment duration  
33 were collected from patients. Data on viral load were not collected due to their  
34 unavailability at the study period. Non-adherence to ART was measured by self-  
35 report items. First, ART adherence last month was determined by visual analog  
36 scale (VAS) where 0-point showed complete non-adherence and 100-point showed  
37 complete adherence<sup>43</sup>. Participants were asked whether they forget to take ART  
38 medicine in the last four days. This approach has been applied successfully in a  
39 previous study<sup>44</sup>. We also asked the participants about whether they received peer  
40 support during ART treatment (Yes/No), and whether they shared their health status  
41 with their peers or not (Yes/No).  
42  
43

#### 44 **Health – related quality of life**

45 HRQOL was measured using the EQ-5D-5L instrument in the Vietnamese version,  
46 which was validated elsewhere<sup>45</sup>. This tool measures five dimensions including  
47 mobility, self-care, usual activities, pain/discomfort and anxiety/ depression with five  
48 response levels: no problems, slight problems, moderate problems, severe  
49 problems, and extreme problems<sup>46</sup>. The combination of responses gives 3125  
50 health states with weighting to have aggregate single index<sup>45</sup>. Cronbach's alpha of  
51 this instrument was 0.85 with good convergent validity<sup>45</sup>. Furthermore, we also use  
52 the EQ-VAS (visual analogue scale) which measures the self-rated health on a 20-  
53 cm vertical scale, with the endpoint ranges from 0 to 100 point, labeled 'the worst  
54 health you can imagine' and 'the best health you can imagine'<sup>47</sup>.  
55  
56  
57  
58  
59



### Physical activity

To assess level of physical activity of respondent, we used the International Physical Activity Questionnaire (IPAQ). The IPAQ is developed to use in adults (15-69 years old)<sup>48</sup>. Several questions were used to assess three specific types of activity: vigorous activity, moderate activity and walking activity. Examples of each type of activity in our research context are listed below:

- Vigorous activity: Heavy lifting, hoeing, weight lifting, fast paced cycling, etc.
- Moderate activity: Playing badminton, slow paced cycling, cradling baby, selling, etc.
- Walking activity: Going to work, going to school, going elsewhere, going jogging, etc.

Each activity was scored separately by frequency (measured by days per week) and duration (measured by time per day). Volume of each activity was also measured by its energy requirements determined in METs (METs are multiple of the resting metabolic rate)<sup>48</sup>.

The total IPAQ score was used as a continuous variable which was calculated by adding the MET minute per week of three types of activity. We also evaluated the IPAQ score as categorical variable which divided their physical activity into 3 levels: Inactive, minimally active and HEPA active. Participants were categorized into (1) HEPA (health enhancing physical activity) active group if they did vigorous activity on at least 3 days obtaining at least 1500 MET-minutes/week; OR 7 or more days of walking combining with moderate-intensity or vigorous activities obtaining at least 3000 MET-minutes/week. Participants were in (2) Minimally active group if they had 3 or more days of vigorous activity of at least 20 minutes per day (800 MET-minutes/week) OR 5 or more days of moderate activity or walking of at least 30 minutes per day OR 5 or more days of walking combining with moderate-intensity or vigorous intensity activities obtaining at least 600 MET-min/week. Participants were (3) Inactive if Individuals who not meet requirements for Categories 2 or 3 were determined as insufficiently active<sup>48</sup>.

### Statistical analysis

Data was analyzed by STATA version 12 (Stata Corp. LP, College Station, United States of America). Chi-square test and Mann Whitney test was used for demographic characteristics of respondents as well as HRQOL, ART status and sexual behaviors. Multivariate linear regression was employed to identify factors associated with IPAQ score. Because the IPAQ score had non-normal distribution, we performed log-transformation for this variable in order to meet the requirement of regression model. We also applied multivariate logistic regression to identify factors associated with whether the respondents were active in physical activity or not. We applied forward stepwise selection strategy to remove non-significant factors, the p-value of log likelihood ratio test was set as less than 0.1 and this was the threshold to include a variable. A p-value <0.05 was considered as statistical significance.

### Ethics approval

The study protocol was reviewed and ethics approval was granted by the Vietnam Authority of HIV/AIDS Control's Scientific Research Committee. Patients confidently participated in the study and signed a written informed consent after receiving clearly

introduction about the benefits and drawbacks of the study. The consent process took place in a room with restricted access. Respondents can withdraw from the interview at any time and this did not affect their current treatment.

## Results

The demographic and socioeconomic characteristics of respondents living in rural and urban are given in **Table 1**. Out of 1,133 ART respondents, approximately 60% was male. The majority had secondary and high school education (36.9% and 32% respectively); participants in urban areas had higher education than people in rural area ( $p=0.04$ ). The marital status and employment were also significant different between rural and urban group ( $p<0.01$ ). There was no difference of age group between rural and urban respondents.

**Table 1: Socio-economic characteristic of PLWH in the study (n=1133)**

|                              | Rural |      | Urban |      | Total |      | p-value            |
|------------------------------|-------|------|-------|------|-------|------|--------------------|
|                              | n     | %    | n     | %    | n     | %    |                    |
| <b>Gender</b>                |       |      |       |      |       |      |                    |
| Male                         | 145   | 56.2 | 520   | 59.4 | 665   | 58.7 | 0.36 <sup>†</sup>  |
| Female                       | 113   | 43.8 | 355   | 40.6 | 468   | 41.3 |                    |
| <b>Education</b>             |       |      |       |      |       |      |                    |
| Illiterate                   | 5     | 1.9  | 7     | 0.8  | 12    | 1.1  | 0.04 <sup>†</sup>  |
| Elementary school            | 48    | 18.6 | 172   | 19.7 | 220   | 19.4 |                    |
| Secondary school             | 109   | 42.3 | 309   | 35.3 | 418   | 36.9 |                    |
| High school                  | 80    | 31   | 282   | 32.2 | 362   | 32   |                    |
| Vocational training          | 6     | 2.3  | 48    | 5.5  | 54    | 4.8  |                    |
| University                   | 10    | 3.9  | 57    | 6.5  | 67    | 5.9  |                    |
| <b>Marital status</b>        |       |      |       |      |       |      |                    |
| Single                       | 26    | 10.1 | 143   | 16.3 | 169   | 14.9 | 0.01 <sup>†</sup>  |
| Live with spouse             | 178   | 69   | 507   | 57.9 | 685   | 60.5 |                    |
| Live with partner            | 0     | 0    | 8     | 0.9  | 8     | 0.7  |                    |
| Divorced                     | 22    | 8.5  | 66    | 7.5  | 88    | 7.8  |                    |
| Widow                        | 32    | 12.4 | 151   | 17.3 | 183   | 16.2 |                    |
| <b>Religion</b>              |       |      |       |      |       |      |                    |
| Cult of ancestors            | 222   | 86.1 | 779   | 89   | 1,001 | 88.4 | 0.03 <sup>†</sup>  |
| Buddhism                     | 12    | 4.7  | 43    | 4.9  | 55    | 4.9  |                    |
| Catholic                     | 24    | 9.3  | 44    | 5    | 68    | 6    |                    |
| Protestant                   | 0     | 0    | 9     | 1    | 9     | 0.8  |                    |
| <b>Employment</b>            |       |      |       |      |       |      |                    |
| Unemployed                   | 47    | 18.2 | 184   | 21   | 231   | 20.4 | <0.01 <sup>†</sup> |
| Self-employed                | 98    | 38   | 371   | 42.4 | 469   | 41.4 |                    |
| White-collar worker          | 13    | 5    | 67    | 7.7  | 80    | 7.1  |                    |
| Blue-collar worker or farmer | 94    | 36.4 | 188   | 21.5 | 282   | 24.9 |                    |
| Others                       | 6     | 2.3  | 65    | 7.4  | 71    | 6.3  |                    |
| <b>Age group</b>             |       |      |       |      |       |      |                    |
| 18- <25                      | 6     | 2.3  | 17    | 1.9  | 23    | 2    | 0.91 <sup>†</sup>  |
| 25- <30                      | 30    | 11.6 | 119   | 13.6 | 149   | 13.2 |                    |
| 30- <35                      | 94    | 36.4 | 319   | 36.5 | 413   | 36.5 |                    |
| 35- <40                      | 71    | 27.5 | 237   | 27.1 | 308   | 27.2 |                    |
| 40- <45                      | 34    | 13.2 | 98    | 11.2 | 132   | 11.7 |                    |
| >=45                         | 23    | 8.9  | 85    | 9.7  | 108   | 9.5  |                    |

Significance level was  $p < 0.05$

†Chi-square test

### Antiretroviral therapy status

About half of respondents were asymptomatic and the proportion of rural respondents unaware of their stage of HIV infection was significantly higher than urban patients (52.1% vs 24.7%) (**Table 2**). The mean number of CD4 measurements and duration of ART treatment were 294.7 cells/ $\mu$ L (SD=215.2) and 3.5 years (SD=2.2) respectively. About 50% of patients shared health status with their peers and only one-third received peer support.

**Table 2: Antiretroviral therapy status of patients (n=1133)**

|                                                       | Rural       |           | Urban       |           | Total       |           | p-value            |
|-------------------------------------------------------|-------------|-----------|-------------|-----------|-------------|-----------|--------------------|
|                                                       | n           | %         | n           | %         | n           | %         |                    |
| <b>HIV period</b>                                     |             |           |             |           |             |           |                    |
| Asymptomatic                                          | 67          | 28.4      | 389         | 46        | 456         | 42.1      | <0.01 <sup>†</sup> |
| Symptomatic                                           | 32          | 13.6      | 161         | 19        | 193         | 17.8      |                    |
| AIDS                                                  | 14          | 5.9       | 87          | 10.3      | 101         | 9.3       |                    |
| Unknown                                               | 123         | 52.1      | 209         | 24.7      | 332         | 30.7      |                    |
| <b>ART duration (year)</b>                            |             |           |             |           |             |           |                    |
| 1 year                                                | 47          | 19.0      | 213         | 26.9      | 260         | 25.0      | <0.01 <sup>†</sup> |
| 2 – 4 years                                           | 91          | 36.9      | 354         | 44.7      | 445         | 42.8      |                    |
| More than 4 years                                     | 109         | 44.1      | 225         | 28.4      | 334         | 32.2      |                    |
| <b>Share health status with peers</b>                 |             |           |             |           |             |           |                    |
| Yes                                                   | 110         | 43.3      | 446         | 52.7      | 556         | 50.6      | 0.01 <sup>†</sup>  |
| No                                                    | 144         | 56.7      | 400         | 47.3      | 544         | 49.5      |                    |
| <b>Receiving peer support</b>                         |             |           |             |           |             |           |                    |
| Yes                                                   | 77          | 29.8      | 314         | 35.9      | 391         | 34.5      | 0.07 <sup>†</sup>  |
| No                                                    | 181         | 70.2      | 561         | 64.1      | 742         | 65.5      |                    |
| <b>Forgetting to take medicine in the last 4 days</b> |             |           |             |           |             |           |                    |
| No                                                    | 243         | 98        | 780         | 97.7      | 1,023       | 97.8      | 0.82 <sup>†</sup>  |
| Yes                                                   | 5           | 2         | 18          | 2.3       | 23          | 2.2       |                    |
|                                                       | <b>Mean</b> | <b>SD</b> | <b>Mean</b> | <b>SD</b> | <b>Mean</b> | <b>SD</b> |                    |
| <b>ART Duration (year)</b>                            | 4.0         | 2.4       | 3.3         | 2.1       | 3.5         | 2.2       | <0.01 <sup>¶</sup> |
| <b>CD4 cell count</b>                                 | 312.5       | 220.6     | 289.2       | 213.4     | 294.7       | 215.2     | 0.08 <sup>¶</sup>  |
| <b>ART adherence (VAS)</b>                            | 94.8        | 8.2       | 93.9        | 11        | 94.1        | 10.4      | 0.55 <sup>¶</sup>  |

Significance level was  $p < 0.05$

†Chi-square test

¶Mann Whitney test

### Self-reported health status

The percentage of urban respondents having any problem in mobility, self-care, doing usual activities were significant higher than those of rural respondents ( $p < 0.01$ ) (**Table 3**). About 40% of respondents suffered from anxiety or depression, and about half of the respondents suffered from pain or discomfort, with no significant difference between rural and urban respondents. The mean EQ-5D-5L index was 0.8 (SD=0.2) and the perceived EQ-VAS score among rural respondents was statistically significantly higher than those of urban respondents ( $p < 0.01$ ).

**Table 3: Health status among respondents (n=1133)**

|                                             | Rural       |           | Urban       |           | Total       |           | p-value            |
|---------------------------------------------|-------------|-----------|-------------|-----------|-------------|-----------|--------------------|
|                                             | n           | %         | n           | %         | n           | %         |                    |
| <b>Self-reported health problems</b>        |             |           |             |           |             |           |                    |
| Mobility                                    | 33          | 12.8      | 199         | 22.7      | 232         | 20.5      | <0.01 <sup>†</sup> |
| Self-care                                   | 12          | 4.7       | 98          | 11.2      | 110         | 9.7       | <0.01 <sup>†</sup> |
| Usual Activities                            | 26          | 10.1      | 162         | 18.5      | 188         | 16.6      | <0.01 <sup>†</sup> |
| Pain or Discomfort                          | 85          | 33.0      | 342         | 39.1      | 427         | 37.7      | 0.07 <sup>†</sup>  |
| Anxiety or Depression                       | 104         | 40.3      | 405         | 46.3      | 509         | 44.9      | 0.09 <sup>†</sup>  |
| <b>Complications and concurrent disease</b> |             |           |             |           |             |           |                    |
|                                             | 76          | 29.5      | 329         | 37.6      | 405         | 35.8      | 0.02 <sup>†</sup>  |
|                                             | <b>Mean</b> | <b>SD</b> | <b>Mean</b> | <b>SD</b> | <b>Mean</b> | <b>SD</b> |                    |
| <b>EQ-5D-5L index</b>                       | 0.8         | 0.2       | 0.8         | 0.3       | 0.8         | 0.2       | 0.18 <sup>¶</sup>  |
| <b>EQ-VAS</b>                               | 70.1        | 16.0      | 68.4        | 17.6      | 68.8        | 17.3      | <0.01 <sup>¶</sup> |

Significance level was  $p < 0.05$

<sup>†</sup>Chi-square test

<sup>¶</sup>Mann Whitney test

#### Physical activity level

Sixteen percent of respondents were inactive and 68% of participants were HEPA active using the IPAQ. Rural patients reported statistically higher level of physical activity and IPAQ score compared to urban patients ( $p=0.03$  and  $p<0.01$  respectively). Regarding moderate activity, number of days per week and mean value of MET-score among respondents living in rural areas were higher than those in urban areas ( $p<0.01$  and  $p=0.01$  respectively). However, mean MET-score of vigorous activity and walking activity were similar between two groups.

**Table 4: Physical activity levels of participants**

|                                   | Rural       |           | Urban       |           | Total       |           | p-value                     |
|-----------------------------------|-------------|-----------|-------------|-----------|-------------|-----------|-----------------------------|
|                                   | n           | %         | n           | %         | n           | %         |                             |
| <b>Level of physical activity</b> |             |           |             |           |             |           |                             |
| Inactive                          | 29          | 11.3      | 152         | 17.4      | 181         | 16.0      | <b>0.03<sup>†</sup></b>     |
| Minimally active                  | 37          | 14.3      | 144         | 16.4      | 181         | 16.0      |                             |
| HEPA active                       | 192         | 74.4      | 579         | 66.2      | 771         | 68.0      |                             |
|                                   | <b>Mean</b> | <b>SD</b> | <b>Mean</b> | <b>SD</b> | <b>Mean</b> | <b>SD</b> |                             |
| <b>Vigorous activity</b>          |             |           |             |           |             |           |                             |
| Days per week                     | 1.5         | 0.2       | 1.2         | 0.1       | 1.3         | 2.5       | 0.09 <sup>¶</sup>           |
| Minutes per day                   | 95.4        | 11.2      | 81.1        | 6         | 84.4        | 177.6     | 0.15 <sup>¶</sup>           |
| MET-score                         | 4360.9      | 555.5     | 3444.4      | 282.5     | 3651.9      | 8465.9    | 0.11 <sup>¶</sup>           |
| <b>Moderate activity</b>          |             |           |             |           |             |           |                             |
| Days per week                     | 5.4         | 0.2       | 4.8         | 0.1       | 4.9         | 2.8       | <b>&lt;0.01<sup>¶</sup></b> |
| Minutes per day                   | 170.2       | 5.7       | 155.9       | 3.3       | 159.1       | 96        | 0.04 <sup>¶</sup>           |
| MET-score                         | 4211.3      | 165.7     | 3737.9      | 92.2      | 3845.9      | 2711.1    | <b>0.01<sup>¶</sup></b>     |

|                         | Rural  |       | Urban  |       | Total  |        | p-value                      |
|-------------------------|--------|-------|--------|-------|--------|--------|------------------------------|
|                         | n      | %     | n      | %     | n      | %      |                              |
| <b>Walking activity</b> |        |       |        |       |        |        |                              |
| Days per week           | 3.4    | 0.2   | 3.3    | 0.1   | 3.4    | 3.3    | 0.67 <sup>††</sup>           |
| Minutes per day         | 18.6   | 1.8   | 21.8   | 1.3   | 21.1   | 36.8   | 0.99 <sup>††</sup>           |
| MET-score               | 377.1  | 38.3  | 451.5  | 29.3  | 434.6  | 816.3  | 0.87 <sup>††</sup>           |
| <b>IPAQ Score</b>       | 8977.9 | 535.5 | 7613.5 | 280.5 | 7922.9 | 8333.8 | <b>&lt;0.01<sup>††</sup></b> |

Number of total participants, n= 1133

Significance level was  $p < 0.05$

<sup>†</sup>Chi-square test and

<sup>††</sup>Mann Whitney test

IPAQ score also differentially associated with ART treatment duration (**Figure 1**). A higher IPAQ score was associated with a shorter antiretroviral therapy (ART) duration; longer antiretroviral therapy (ART) treatment was associated with a lower IPAQ score. Specifically, it increased within the first year of ART, plateaued during 2 to 4 years of treatment, and then decreased.

### Figure 1. Physical activity among antiretroviral therapy (ART) patients regarding ART duration.

#### Factors associated with level of activity

Respondents were more likely to have a higher IPAQ-score and classify as active in physical activity if they were female, self-employed and were blue-collar workers or farmers. Respondents who had a higher CD4 cell count, shared their health status with their peers, and reported a higher EQ-5D-5L index/EQ-VAS were also more likely to have higher IPAQ score or be active in physical activity. By contrast, a lower IPAQ-score was associated with living in urban areas and being at the symptomatic stage. In addition, respondents who had poor adherence and higher duration of ART were more likely to be inactive in physical activity.

**Table 5: Factors associated with levels of physical activity among antiretroviral therapy patients in Vietnam in 2013**

|                                             | IPAQ-score |              | Active |             |
|---------------------------------------------|------------|--------------|--------|-------------|
|                                             | Coef.      | 95 CI        | OR     | 95 CI       |
| <b>Gender (Female vs Male)</b>              | 0.25*      | 0.11; 0.39   | 2.53*  | 1.58; 4.07  |
| <b>Living location (Urban vs Rural)</b>     | -0.17*     | -0.34; -0.01 | 0.60   | 0.35; 1.05  |
| <b>Education attainment (vs Illiterate)</b> |            |              |        |             |
| High school                                 |            |              | 1.52   | 0.94; 2.46  |
| <b>Religion (vs Cults of Ancestor)</b>      |            |              |        |             |
| Buddhism                                    |            |              | 2.78   | 0.73; 10.57 |
| <b>Occupation (vs Unemployed)</b>           |            |              |        |             |
| Self-employed                               | 0.60*      | 0.41; 0.79   | 2.98*  | 1.78; 4.99  |
| White-collar workers                        | 0.29       | -0.02; 0.59  | 2.43   | 0.87; 6.79  |
| Blue-collar worker/farmers                  | 0.73*      | 0.52; 0.94   | 2.24*  | 1.27; 3.95  |

|                                                                   |        |              |       |             |
|-------------------------------------------------------------------|--------|--------------|-------|-------------|
| Others                                                            | 0.53*  | 0.22; 0.84   | 3.28* | 1.07; 10.05 |
| <b>EQ-5D index</b>                                                |        |              | 4.49* | 1.68; 12.02 |
| <b>EQ-VAS</b>                                                     | 0.01*  | 0.00; 0.01   | 1.02* | 1.00; 1.03  |
| <b>Current CD4 cell count</b>                                     | 0.01*  | 0.00; 0.01   | 1.02* | 1.01; 1.03  |
| <b>ART duration</b>                                               |        |              | 0.91* | 0.82; 1.00  |
| <b>HIV Stages (vs Asymptomatic)</b>                               |        |              |       |             |
| Symptomatic                                                       | -0.20* | -0.38; -0.01 |       |             |
| AIDS                                                              |        |              | 1.81  | 0.87; 3.79  |
| <b>Forgetting to take medicine in the last 4 days (Yes vs No)</b> |        |              | 0.26* | 0.09; 0.80  |
| <b>Share health status with peers (Yes vs No)</b>                 | 0.26*  | 0.12; 0.40   | 1.86* | 1.21; 2.84  |

\* $p < 0.05$ ; OR: Odds Ratio; 95% CI: 95% Confidence Interval

## Discussion

This study confirms our hypothesis that PLWH in urban areas had lower level of physical activity compared to their peer in rural settings. In our study, a majority of ART patients achieved HEPA active in physical activity. By using multivariate regression models, we found a number of sociodemographic, clinical and social factors that are associated with the level of physical activity among PLWH in Vietnam. These results will contribute significantly to the development of tailored interventions to boost the physical activity among this population in the future.

Compared to previous studies on ART patients using the IPAQ system, the percentage of inactive (16%) or minimally active (16%) respondents in our study was much lower<sup>12 27 29 30</sup>. Most respondents reported the highest frequency of moderate activity (playing sport, cycling, cradling baby, etc.), which is different from previous studies founding that walking was the most preferred physical activity among PLWH<sup>14 30</sup>. These activities can positively affect PLWH by decreasing side-effects associated with HIV/AIDS and cardiometabolic complications accompanied with ART treatment<sup>15 49</sup>. However, a number of patients in our study, particularly in urban settings, had difficulty in mobility or pain/discomfort that limited their ability to engage in healthy physical activities. Therefore, the health staff may provide alternative methods of exercising such as passive motion exercise, hydrotherapy or stationary cycling since it found to be as effective for enhancing functional fitness as active exercise practice<sup>50</sup>.

The total physical activity score in rural area was higher than in urban areas in our study, which is consistent with the physical activity level of the general Vietnamese population<sup>35</sup>. In Vietnam, the main occupations in rural areas were farmers and blue-collar workers and rural participants often viewed working on farm or heavy working conditions as vigorous physical activity. Moreover, some environmental factors in rural areas such as sidewalk conditions, the availability of exercise equipment and sedentary behavior in urbanization may affect individual willingness to take part in physical activity<sup>37 51</sup>.

Our study also found that respondents who were unemployed were less likely to be physically active, which concurs with prior findings<sup>52 53</sup>. Unemployed patients are

1  
2  
3 less likely to obtain adequate physical activity because occupational activity is  
4 concerned as a vital component of daily physical activity in adulthood<sup>54-56</sup>. In  
5 addition, our study found that female respondents were more likely to get a higher  
6 level of physical activity. This can be explained by the fact that in the traditional  
7 Vietnamese culture, women still have responsibilities of taking care children and all  
8 household activities, which were mainly classified as moderate physical activity in  
9 our study<sup>57 58</sup>.

10  
11 Interestingly, we found that people with higher duration of ART were less likely to be  
12 physically active. Notably, this association was found as a non-linear relationship.  
13 This is probably because patients had to adapt with rigorous adherence during the  
14 initiation of their treatment, which might enhance their willingness to involve in  
15 physical activities<sup>44 59 60</sup>. However, the later reduction can be supposed that patients  
16 became careless and complacent when their health status recovered, which made it  
17 harder for them to comply with strict physical regimen<sup>44 59</sup>. We also observed that  
18 non-adherence to ART was associated with a physically inactive status and this  
19 probably because disliking physical activity has been found to be significantly related  
20 to low antiretroviral medication adherence<sup>59</sup>.

21  
22  
23 In term of health status, patients with higher quality of life and higher number of CD4  
24 cell count had higher IPAQ score, while patients at symptomatic stage had lower  
25 IPAQ score compared to those having asymptomatic stage. We supposed that active  
26 in physical activity would help patients to improve and maintain their strength and  
27 quality of life. Two systemic reviews by O'Brien et al. (2016, 2017) found that PLWH  
28 should do physical exercise at least three times per week in at least five weeks to get  
29 stable health<sup>61 62</sup>.

30  
31  
32 Our current study suggested that respondents who shared health status with their  
33 peers were more likely to have a higher IPAQ score. The association between peer  
34 supports and physical activity was investigated by Jerome et al (2012) which found  
35 that peer support was an important determinant to assist patients in adherence to  
36 exercise programs<sup>63</sup>. Additionally, WHO, PEPFAR and Global Fund have proposed  
37 that social support should be considered as an effective adjunct in improving  
38 physical health among PLWH receiving ART treatment<sup>64 65</sup>. As PLWH were more  
39 vulnerable and withdrawn from social situations<sup>66</sup>, peer support can promote  
40 patients' health through sharing relevant personal experiences to acquire knowledge,  
41 reducing stigma and discrimination, improving physical functioning, and enhancing  
42 retention in ART treatment<sup>67-69</sup>.

43  
44  
45 Several implications can be drawn from this study. First, providing different physical  
46 activity strategies based on rural and urban settings is needed. For example, the  
47 health staff in clinics may organize some outdoor activities via peer educators/groups  
48 to engage urban patients in physical activity. Second, job opportunities and  
49 vocational training should be prioritized to promote physically active among ART  
50 patients<sup>52 53</sup>. Third, the reduction in IPAQ score observed in prolonged ART duration  
51 suggests physical health assessments and appropriate physical activity programs  
52 such as resistance trainings and aerobic exercises should be in place. Besides,  
53 passive motion exercise should be considered for immobilized patients or who had  
54 difficulty in mobility or physical impairments<sup>50</sup>. Fourth, given the association between  
55 the level of physical activity and ART treatment status from our findings, integrative  
56  
57  
58  
59

1  
2  
3 intervention including physical activity, ART medication adherence and health related  
4 quality of life may prove to be efficient and cost-effective<sup>70</sup>. Finally, promoting social  
5 support, especially among peers should be prioritized that enables HIV patients to  
6 share their experiences that motivate others to involve in physical activity<sup>63</sup>.  
7 Furthermore, peer support groups integrated into assigned health facilities would be  
8 useful to patients who are at the initial ART medication.  
9

10 The strengths of this study included a large sample size of HIV-infected patients  
11 receiving antiretroviral therapy treatment, which increased the statistic power of the  
12 result. Additionally, we recruited patients from different levels of health systems  
13 (central, provincial and district ART clinics) in both rural and urban areas, which  
14 made the sample more representative of the general Vietnamese population. We  
15 also employed international instruments such as IPAQ and EQ-5D-5L, which help to  
16 increase the comparability between our results and other global studies.  
17  
18

19 However, several limitations should be acknowledged. Firstly, the convenience  
20 sampling technique was used, which may limit the generalizability of our findings to  
21 other settings and patient populations. Secondly, because the data was based on  
22 self-reported information, it was susceptible to be influenced by interviewers, social  
23 desirability and recall bias. To minimize these biases, interviewers affiliated with  
24 selected health centers were excluded from the study and patients were given clear  
25 instructions on the benefits and drawbacks of the study. Thirdly, the causal  
26 inferences could not be established due to the cross-sectional design. Finally, some  
27 barriers to physically active such as social factors (stigma, discrimination), family  
28 support or clinical settings (healthcare providers) were not fully addressed in this  
29 study, warranting further research to elucidate these gaps.  
30  
31

### 32 **Conclusion**

33 In conclusion, the study confirmed the high percentage of HIV patients receiving  
34 ART treatment physically active. Our study also emphasized the association  
35 between high level of physical activity and the improvement of ART adherence,  
36 health-related quality of life and CD4 cell count. Interventions to promote physical  
37 activity among PLWH in urban areas and in later ART treatment are needed. Peer  
38 support and job guidance hold potentials in supporting to enhance the level of  
39 physical activity.  
40  
41  
42  
43  
44  
45  
46  
47  
48  
49  
50  
51  
52  
53  
54  
55  
56  
57  
58  
59  
60



## LIST OF ABBREVIATION

ART: Antiretroviral Therapy

PLWH: People Living With HIV

WHO: World Health Organization

PEPFAR: President's Emergency Plan For AIDS Relief

## ACKNOWLEDGEMENTS

The authors would like to acknowledge supports by the Vietnam Authority of HIV/AIDS Control and Hanoi Provincial AIDS Centers for the acceptance to implement the study. There was no funding for this analysis.

### Funding

There was no funding for this analysis

### Authors' Contributions

AKD, LHN, AQN, BXT, TTT, CAL conceived of the study, and participated in its design and implementation and wrote the manuscript. AKD, LHN, BXT, analysed the data. All authors read and approved the final manuscript.

### Competing interests

The authors declare that they have no competing interests.

### Data sharing statement

The data that support the findings of this study are available from the Vietnam Authority of HIV/AIDS Control but restrictions apply to the availability of these data, which were used under license for the current study, and so are not publicly available. Data are however available from the authors upon reasonable request and with permission of the Vietnam Authority of HIV/AIDS Control.

## References

1. UNAIDS. Global AIDS Update 2016, 2016.
2. Grossman HA, Sullivan PS, Wu AW. Quality of life and HIV: current assessment tools and future directions for clinical practice. *AIDS Read* 2003;13(12):583-90, 95-7.
3. Saves M, Raffi F, Capeau J, et al. Factors related to lipodystrophy and metabolic alterations in patients with human immunodeficiency virus infection receiving highly active antiretroviral therapy. *Clin Infect Dis* 2002;34(10):1396-405. doi: 10.1086/339866
4. Carr A, Cooper DA. Adverse effects of antiretroviral therapy. *The Lancet* 2000;356(9239):1423-30. doi: [http://dx.doi.org/10.1016/S0140-6736\(00\)02854-3](http://dx.doi.org/10.1016/S0140-6736(00)02854-3)
5. Montessori V, Press N, Harris M, et al. Adverse effects of antiretroviral therapy for HIV infection. *CMAJ* 2004;170(2):229-38.
6. Mutimura E, Stewart A, Rheeder P, et al. Metabolic function and the prevalence of lipodystrophy in a population of HIV-infected African subjects receiving highly active antiretroviral therapy. *J Acquir Immune Defic Syndr* 2007;46(4):451-5.
7. Potthoff A, Brockmeyer NH, Gelbrich G, et al. Lipodystrophy - a sign for metabolic syndrome in patients of the HIV-HEART study. *J Dtsch Dermatol Ges* 2010;8(2):92-8. doi: 10.1111/j.1610-0387.2009.07330.x
8. O'Brien ME, Clark RA, Besch CL, et al. Patterns and correlates of discontinuation of the initial HAART regimen in an urban outpatient cohort. *J Acquir Immune Defic Syndr* 2003;34(4):407-14.
9. Gebrezgabher BB, Kebede Y, Kindie M, et al. Determinants to antiretroviral treatment non-adherence among adult HIV/AIDS patients in northern Ethiopia. *AIDS Research and Therapy* 2017;14(1):16. doi: 10.1186/s12981-017-0143-1
10. Wilson EM, Sereti I. Immune restoration after antiretroviral therapy: the pitfalls of hasty or incomplete repairs. *Immunol Rev* 2013;254(1):343-54. doi: 10.1111/imr.12064
11. Bradley H, Mattson CL, Beer L, et al. Increased antiretroviral therapy prescription and HIV viral suppression among persons receiving clinical care for HIV infection. *AIDS* 2016;30(13):2117-24. doi: 10.1097/QAD.0000000000001164
12. Segatto AFM, Freitas Junior IF, Santos VRd, et al. Lipodystrophy in HIV/AIDS patients with different levels of physical activity while on antiretroviral therapy. *Revista da Sociedade Brasileira de Medicina Tropical* 2011;44:420-24.
13. Caspersen CJ, Powell KE, Christenson GM. Physical activity, exercise, and physical fitness: definitions and distinctions for health-related research. *Public Health Reports* 1985;100(2):126-31.
14. Clingerman EM. Participation in physical activity by persons living with HIV disease. *J Assoc Nurses AIDS Care* 2003;14(5):59-70. doi: 10.1177/1055329003255284
15. Hand GA, Lyerly GW, Jagers JR, et al. Impact of Aerobic and Resistance Exercise on the Health of HIV-Infected Persons. *Am J Lifestyle Med* 2009;3(6):489-99. doi: 10.1177/1559827609342198
16. Rowland TW. The role of physical activity and fitness in children in the prevention of adult cardiovascular disease. *Prog Pediatr Cardiol* 2001;12(2):199-203.
17. Warburton DE, Glendhill N, Quinney A. The effects of changes in musculoskeletal fitness on health. *Can J Appl Physiol* 2001;26(2):161-216.
18. Buttar HS, Li T, Ravi N. Prevention of cardiovascular diseases: Role of exercise, dietary interventions, obesity and smoking cessation. *Exp Clin Cardiol* 2005;10(4):229-49.
19. Boule NG, Haddad E, Kenny GP, et al. Effects of exercise on glycemic control and body mass in type 2 diabetes mellitus: a meta-analysis of controlled clinical trials. *Jama* 2001;286(10):1218-27.
20. Kruk J. Physical activity in the prevention of the most frequent chronic diseases: an analysis of the recent evidence. *Asian Pacific journal of cancer prevention : APJCP* 2007;8(3):325-38.

- 1
- 2
- 3 21. Lynch BM, Neilson HK, Friedenreich CM. Physical activity and breast cancer prevention. *Recent*
- 4 *Results Cancer Res* 2011;186:13-42. doi: 10.1007/978-3-642-04231-7\_2
- 5 22. Mendes EL, Ribeiro Andaki AC, Brito CJ, et al. Beneficial effects of physical activity in an HIV-
- 6 infected woman with lipodystrophy: a case report. *J Med Case Rep* 2011;5:430. doi:
- 7 10.1186/1752-1947-5-430
- 8 23. Roubenoff R, Schmitz H, Bairos L, et al. Reduction of Abdominal Obesity in Lipodystrophy
- 9 Associated with Human Immunodeficiency Virus Infection by Means of Diet and Exercise:
- 10 Case Report and Proof of Principle. *Clinical Infectious Diseases* 2002;34(3):390-93. doi:
- 11 10.1086/338402
- 12 24. Buchholz SW, Purath J. Physical activity and physical fitness counseling patterns of adult nurse
- 13 practitioners. *J Am Acad Nurse Pract* 2007;19(2):86-92. doi: 10.1111/j.1745-
- 14 7599.2006.00197.x
- 15 25. Organization WH. Global recommendations on physical activity for health. Geneva, Switzerland:
- 16 World Health Organization, 2011.
- 17 26. Prevention CfDca. Act Against AIDS: Physical Activity Atlanta, The United States of America 2017
- 18 [Available from:
- 19 <https://www.cdc.gov/actagainstaids/campaigns/hivtreatmentworks/livewell/physical.html>
- 20 accessed 13-11-2017.
- 21 27. Frantz JM, Murenzi A. The physical activity levels among people living with human
- 22 immunodeficiency virus/acquired immunodeficiency syndrome receiving high active
- 23 antiretroviral therapy in Rwanda. *SAHARA-J: Journal of Social Aspects of HIV/AIDS* 2013;10(3-
- 24 4):113-18.
- 25 28. Trevisol F, Alencastro P, Ribeiro P, et al. Association of physical activity with lipodystrophy
- 26 syndrome in HIV-infected patients. *J AIDS Clinic Res* 2012;3(8):1.
- 27 29. Monroe AK, Brown TT, Cox C, et al. Physical Activity and Its Association with Insulin Resistance in
- 28 Multicenter AIDS Cohort Study Men. *AIDS Res Hum Retroviruses* 2015;31(12):1250-6. doi:
- 29 10.1089/aid.2015.0027
- 30 30. Fillipas S, Bowtell-Harris CA, Oldmeadow LB, et al. Physical activity uptake in patients with HIV:
- 31 who does how much? *International journal of STD & AIDS* 2008;19(8):514-8. doi:
- 32 10.1258/ijsa.2007.007237 [published Online First: 2008/07/30]
- 33 31. Trang NH, Hong TK, HP VDP, et al. Longitudinal physical activity changes in adolescents: Ho Chi
- 34 Minh City Youth Cohort. *Med Sci Sports Exerc* 2012;44(8):1481-9. doi:
- 35 10.1249/MSS.0b013e31824e50dc
- 36 32. Trang NH, Hong TK, Dibley MJ, et al. Factors associated with physical inactivity in adolescents in
- 37 Ho Chi Minh City, Vietnam. *Med Sci Sports Exerc* 2009;41(7):1374-83. doi:
- 38 10.1249/MSS.0b013e31819c0dd3
- 39 33. Tran VD, Lee AH, Jancey J, et al. Community-based physical activity and nutrition programme for
- 40 adults with metabolic syndrome in Vietnam: study protocol for a cluster-randomised
- 41 controlled trial. *BMJ Open* 2016;6(6):e011532. doi: 10.1136/bmjopen-2016-011532
- 42 34. Nguyen TH, Tang HK, Kelly P, et al. Association between physical activity and metabolic
- 43 syndrome: a cross sectional survey in adolescents in Ho Chi Minh City, Vietnam. *BMC Public*
- 44 *Health* 2010;10:141. doi: 10.1186/1471-2458-10-141
- 45 35. Bui TV, Blizzard CL, Luong KN, et al. Physical Activity in Vietnam: Estimates and Measurement
- 46 Issues. *PloS one* 2015;10(10):e0140941. doi: 10.1371/journal.pone.0140941
- 47 36. Rees S, Silove D, Chey T, et al. Physical activity and psychological distress amongst Vietnamese
- 48 living in the Mekong Delta. *Aust N Z J Psychiatry* 2012;46(10):966-71. doi:
- 49 10.1177/0004867412459568
- 50 37. Minh HV, Byass P, Wall S. Mortality from cardiovascular diseases in Bavi District, Vietnam. *Scand*
- 51 *J Public Health Suppl* 2003;62:26-31.
- 52
- 53
- 54
- 55
- 56
- 57
- 58
- 59
- 60

- 1
- 2
- 3 38. Bui TV, Blizzard CL, Luong KN, et al. National survey of risk factors for non-communicable disease
- 4 in Vietnam: prevalence estimates and an assessment of their validity. *BMC public health*
- 5 2016;16 doi: 10.1186/s12889-016-3160-4
- 6 39. Service UFA. Vietnam retails food sector report 2016. Hanoi, Vietnam: USDA Foreign Agriculture
- 7 Service, 2016.
- 8 40. UNAIDS. Antiretroviral therapy coverage (% of people living with HIV), 2017.
- 9 41. Assembly N. Constitution of the Socialist Republic of Vietnam: National Assembly, 2013.
- 10 42. Health VMO. Decision No 3003/QD-BYT on issuing "Guideline for HIV diagnosis and treatment".
- 11 2009
- 12 43. Giordano TP, Guzman D, Clark R, et al. Measuring Adherence to Antiretroviral Therapy in a
- 13 Diverse Population Using a Visual Analogue Scale. *HIV Clinical Trials* 2004;5(2):74-79. doi:
- 14 10.1310/JFXH-G3X2-EYM6-D6UG
- 15 44. Tran BX, Nguyen LT, Nguyen NH, et al. Determinants of antiretroviral treatment adherence
- 16 among HIV/AIDS patients: a multisite study. *Global health action* 2013;6:19570. doi:
- 17 10.3402/gha.v6i0.19570 [published Online First: 2013/03/19]
- 18 45. Tran BX, Ohinmaa A, Nguyen LT. Quality of life profile and psychometric properties of the EQ-5D-
- 19 5L in HIV/AIDS patients. *Health and quality of life outcomes* 2012;10:132. doi: 10.1186/1477-
- 20 7525-10-132
- 21 46. Keebler D, Revill P, Braithwaite S, et al. Cost-effectiveness of different strategies to monitor
- 22 adults on antiretroviral treatment: a combined analysis of three mathematical models. *The*
- 23 *Lancet Global Health* 2014;2(1):e35-e43. doi: 10.1016/S2214-109X(13)70048-2
- 24 47. Ternent L MP, Newlands D. Exploring biases in the double bounded dichotomous choice (DBDC)
- 25 and DBDC with open ended follow-up methods. 2010
- 26 48. Guidelines for Data Processing and Analysis of the International Physical Activity Questionnaire
- 27 (IPAQ) - Short Form. 2004
- 28 49. Grace JM, Semple SJ, Combrink S. Exercise therapy for human immunodeficiency virus/AIDS
- 29 patients: Guidelines for clinical exercise therapists. *Journal of Exercise Science & Fitness*
- 30 2015;13(1):49-56. doi: <http://dx.doi.org/10.1016/j.jesf.2014.10.003>
- 31 50. Takahashi T, Takeshima N, Rogers NL, et al. Passive and active exercises are similarly effective in
- 32 elderly nursing home residents. *J Phys Ther Sci* 2015;27(9):2895-900. doi:
- 33 10.1589/jpts.27.2895
- 34 51. Zimmerman LM, Barnason S, Schulz P, et al. Rural Versus Urban Comparison: Physical Activity
- 35 and Functioning Following Coronary Artery Bypass Surgery. *Online J Rural Nurs Health Care*
- 36 2012;12(1):16-28.
- 37 52. Van Domelen DR, Koster A, Caserotti P, et al. Employment and physical activity in the U.S. *Am J*
- 38 *Prev Med* 2011;41(2):136-45. doi: 10.1016/j.amepre.2011.03.019
- 39 53. Clinger E. Physical activity, social support, and health-related quality of life among persons
- 40 with HIV disease. *Journal of community health nursing* 2004;21(3):179-97. doi:
- 41 10.1207/s15327655jchn2103\_5 [published Online First: 2004/09/25]
- 42 54. Grayson JP. Health, physical activity level, and employment status in Canada. *Int J Health Serv*
- 43 1993;23(4):743-61. doi: 10.2190/W5NR-A7A4-BX4A-T4F7
- 44 55. Lagerros YT, Lagiou P. Assessment of physical activity and energy expenditure in epidemiological
- 45 research of chronic diseases. *Eur J Epidemiol* 2007;22(6):353-62. doi: 10.1007/s10654-007-
- 46 9154-x
- 47 56. Salmon J, Owen N, Bauman A, et al. Leisure-time, occupational, and household physical activity
- 48 among professional, skilled, and less-skilled workers and homemakers. *Preventive medicine*
- 49 2000;30(3):191-9. doi: 10.1006/pmed.1999.0619 [published Online First: 2000/02/24]
- 50 57. Tran BX, Ohinmaa A, Nguyen LT, et al. Gender differences in quality of life outcomes of HIV/AIDS
- 51 treatment in the latent feminization of HIV epidemics in Vietnam. *AIDS care*
- 52 2012;24(10):1187-96. doi: 10.1080/09540121.2012.658752 [published Online First:
- 53 2012/03/02]
- 54
- 55
- 56
- 57
- 58
- 59
- 60

- 1
- 2
- 3 58. Tran BX, Hwang J, Nguyen LH, et al. Impact of Socioeconomic Inequality on Access, Adherence,
- 4 and Outcomes of Antiretroviral Treatment Services for People Living with HIV/AIDS in
- 5 Vietnam. *PLoS one* 2016;11(12):e0168687. doi: 10.1371/journal.pone.0168687
- 6 59. Hansana V, Sanchaisuriya P, Durham J, et al. Adherence to antiretroviral therapy (ART) among
- 7 people living with HIV (PLHIV): a cross-sectional survey to measure in Lao PDR. *BMC Public*
- 8 *Health* 2013;13:617. doi: 10.1186/1471-2458-13-617
- 9 60. Andreo C, Bouhnik AD, Soletti J, et al. [Non-compliance in HIV-infected patients, supported by a
- 10 community association]. *Sante Publique* 2001;13(3):249-62.
- 11 61. O'Brien KK, Tynan AM, Nixon SA, et al. Effectiveness of Progressive Resistive Exercise (PRE) in the
- 12 context of HIV: systematic review and meta-analysis using the Cochrane Collaboration
- 13 protocol. *BMC Infect Dis* 2017;17 doi: 10.1186/s12879-017-2342-8
- 14 62. O'Brien KK, Tynan AM, Nixon SA, et al. Effectiveness of aerobic exercise for adults living with HIV:
- 15 systematic review and meta-analysis using the Cochrane Collaboration protocol. *BMC Infect*
- 16 *Dis* 2016;16 doi: 10.1186/s12879-016-1478-2
- 17 63. Jerome GJ, Dalcin AT, Young DR, et al. Rationale, design and baseline data for the Activating
- 18 Consumers to Exercise through Peer Support (ACE trial): A randomized controlled trial to
- 19 increase fitness among adults with mental illness. *Ment Health Phys Act* 2012;5(2):166-74.
- 20 doi: 10.1016/j.mhpa.2012.05.002
- 21 64. Harding R, Simms V, Penfold S, et al. Multi-centred mixed-methods PEPFAR HIV care & support
- 22 public health evaluation: study protocol. *BMC Public Health* 2010;10:584. doi: 10.1186/1471-
- 23 2458-10-584
- 24 65. Wery A, Burnay J, Karila L, et al. The Short French Internet Addiction Test Adapted to Online
- 25 Sexual Activities: Validation and Links With Online Sexual Preferences and Addiction
- 26 Symptoms. *Journal of sex research* 2016;53(6):701-10. doi:
- 27 10.1080/00224499.2015.1051213 [published Online First: 2015/10/01]
- 28 66. Kalichman SC. Understanding AIDS: A guide for mental health professionals: American
- 29 Psychological Association 1995.
- 30 67. Goel D, Subramanyam A, Kamath R. A study on the prevalence of internet addiction and its
- 31 association with psychopathology in Indian adolescents. *Indian journal of psychiatry*
- 32 2013;55(2):140-3. doi: 10.4103/0019-5545.111451 [published Online First: 2013/07/05]
- 33 68. Peterson JL, Rintamaki LS, Brashers DE, et al. The forms and functions of peer social support for
- 34 people living with HIV. *J Assoc Nurses AIDS Care* 2012;23(4):294-305. doi:
- 35 10.1016/j.jana.2011.08.014
- 36 69. Krebs DW, Chi BH, Mulenga Y, et al. Community-based follow-up for late patients enrolled in a
- 37 district-wide programme for antiretroviral therapy in Lusaka, Zambia. *AIDS care*
- 38 2008;20(3):311-7. doi: 10.1080/09540120701594776
- 39 70. Blashill AJ, Mayer KH, Crane H, et al. Physical activity and health outcomes among HIV-infected
- 40 men who have sex with men: a longitudinal mediational analysis. *Ann Behav Med*
- 41 2013;46(2):149-56. doi: 10.1007/s12160-013-9489-3
- 42
- 43
- 44
- 45
- 46
- 47
- 48
- 49
- 50
- 51
- 52
- 53
- 54
- 55
- 56
- 57
- 58
- 59
- 60

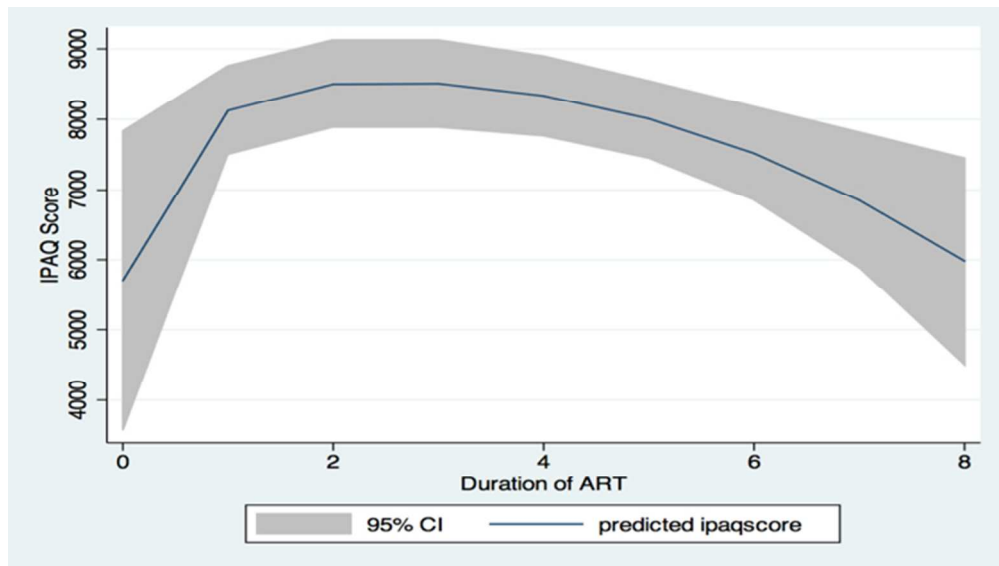

Figure 1. Physical activity among antiretroviral therapy (ART) patients regarding ART duration

338x190mm (54 x 54 DPI)

Review only

## STROBE Statement—checklist of items that should be included in reports of observational studies

|                              | Item No | Page                                                                                                         | Recommendation                                                                                                                                                                             |
|------------------------------|---------|--------------------------------------------------------------------------------------------------------------|--------------------------------------------------------------------------------------------------------------------------------------------------------------------------------------------|
| <b>Title and abstract</b>    | 1       | 1                                                                                                            | (a) Indicate the study's design with a commonly used term in the title or the abstract                                                                                                     |
|                              |         | 2                                                                                                            | (b) Provide in the abstract an informative and balanced summary of what was done and what was found                                                                                        |
| <b>Introduction</b>          |         |                                                                                                              |                                                                                                                                                                                            |
| Background/rationale         | 2       | 4,5                                                                                                          | Explain the scientific background and rationale for the investigation being reported                                                                                                       |
| Objectives                   | 3       | 5                                                                                                            | State specific objectives, including any prespecified hypotheses                                                                                                                           |
| <b>Methods</b>               |         |                                                                                                              |                                                                                                                                                                                            |
| Study design                 | 4       | 5                                                                                                            | Present key elements of study design early in the paper                                                                                                                                    |
| Setting                      | 5       | 5                                                                                                            | Describe the setting, locations, and relevant dates, including periods of recruitment, exposure, follow-up, and data collection                                                            |
| Participants                 | 6       | 5                                                                                                            | (a) <i>Cohort study</i> —Give the eligibility criteria, and the sources and methods of selection of participants. Describe methods of follow-up                                            |
|                              |         |                                                                                                              | <i>Case-control study</i> —Give the eligibility criteria, and the sources and methods of case ascertainment and control selection. Give the rationale for the choice of cases and controls |
|                              |         |                                                                                                              | <i>Cross-sectional study</i> —Give the eligibility criteria, and the sources and methods of selection of participants                                                                      |
| Variables                    | 7       | 6,7                                                                                                          | (b) <i>Cohort study</i> —For matched studies, give matching criteria and number of exposed and unexposed                                                                                   |
|                              |         |                                                                                                              | <i>Case-control study</i> —For matched studies, give matching criteria and the number of controls per case                                                                                 |
|                              |         |                                                                                                              | Clearly define all outcomes, exposures, predictors, potential confounders, and effect modifiers. Give diagnostic criteria, if applicable                                                   |
| Data sources/<br>measurement | 8*      | 6,7                                                                                                          | For each variable of interest, give sources of data and details of methods of assessment (measurement). Describe comparability of assessment methods if there is more than one group       |
| Bias                         | 9       | 7                                                                                                            | Describe any efforts to address potential sources of bias                                                                                                                                  |
| Study size                   | 10      | 6                                                                                                            | Explain how the study size was arrived at                                                                                                                                                  |
| Quantitative variables       | 11      | 6,7                                                                                                          | Explain how quantitative variables were handled in the analyses. If applicable, describe which groupings were chosen and why                                                               |
| Statistical methods          | 2       | 7                                                                                                            | (a) Describe all statistical methods, including those used to control for confounding                                                                                                      |
|                              |         | 7                                                                                                            | (b) Describe any methods used to examine subgroups and interactions                                                                                                                        |
|                              |         | 7                                                                                                            | (c) Explain how missing data were addressed                                                                                                                                                |
|                              |         |                                                                                                              | (d) <i>Cohort study</i> —If applicable, explain how loss to follow-up was addressed                                                                                                        |
|                              |         |                                                                                                              | <i>Case-control study</i> —If applicable, explain how matching of cases and controls was addressed                                                                                         |
|                              |         | <i>Cross-sectional study</i> —If applicable, describe analytical methods taking account of sampling strategy |                                                                                                                                                                                            |
|                              |         | (e) Describe any sensitivity analyses                                                                        |                                                                                                                                                                                            |

|                          | Item No | Page       | Recommendation                                                                                                                                                                                                                                                                                                                                                                                                |
|--------------------------|---------|------------|---------------------------------------------------------------------------------------------------------------------------------------------------------------------------------------------------------------------------------------------------------------------------------------------------------------------------------------------------------------------------------------------------------------|
| <b>Results</b>           |         |            |                                                                                                                                                                                                                                                                                                                                                                                                               |
| Participants             | 13*     | 8          | (a) Report numbers of individuals at each stage of study—eg numbers potentially eligible, examined for eligibility, confirmed eligible, included in the study, completing follow-up, and analysed<br>(b) Give reasons for non-participation at each stage<br>(c) Consider use of a flow diagram                                                                                                               |
| Descriptive data         | 14*     | 8-11       | (a) Give characteristics of study participants (eg demographic, clinical, social) and information on exposures and potential confounders                                                                                                                                                                                                                                                                      |
|                          |         | 7          | (b) Indicate number of participants with missing data for each variable of interest                                                                                                                                                                                                                                                                                                                           |
|                          |         |            | (c) <i>Cohort study</i> —Summarise follow-up time (eg, average and total amount)                                                                                                                                                                                                                                                                                                                              |
| Outcome data             | 15*     |            | <i>Cohort study</i> —Report numbers of outcome events or summary measures over time                                                                                                                                                                                                                                                                                                                           |
|                          |         |            | <i>Case-control study</i> —Report numbers in each exposure category, or summary measures of exposure                                                                                                                                                                                                                                                                                                          |
|                          |         | 7          | <i>Cross-sectional study</i> —Report numbers of outcome events or summary measures                                                                                                                                                                                                                                                                                                                            |
| Main results             | 16      | 7, 8,9,10  | (a) Give unadjusted estimates and, if applicable, confounder-adjusted estimates and their precision (eg, 95% confidence interval). Make clear which confounders were adjusted for and why they were included<br>(b) Report category boundaries when continuous variables were categorized<br>(c) If relevant, consider translating estimates of relative risk into absolute risk for a meaningful time period |
|                          |         |            |                                                                                                                                                                                                                                                                                                                                                                                                               |
|                          |         |            |                                                                                                                                                                                                                                                                                                                                                                                                               |
| Other analyses           | 17      |            | Report other analyses done—eg analyses of subgroups and interactions, and sensitivity analyses                                                                                                                                                                                                                                                                                                                |
| <b>Discussion</b>        |         |            |                                                                                                                                                                                                                                                                                                                                                                                                               |
| Key results              | 18      | 9          | Summarise key results with reference to study objectives                                                                                                                                                                                                                                                                                                                                                      |
| Limitations              | 19      | 14         | Discuss limitations of the study, taking into account sources of potential bias or imprecision. Discuss both direction and magnitude of any potential bias                                                                                                                                                                                                                                                    |
| Interpretation           | 20      | 12, 13, 14 | Give a cautious overall interpretation of results considering objectives, limitations, multiplicity of analyses, results from similar studies, and other relevant evidence                                                                                                                                                                                                                                    |
| Generalisability         | 21      | 14         | Discuss the generalisability (external validity) of the study results                                                                                                                                                                                                                                                                                                                                         |
| <b>Other information</b> |         |            |                                                                                                                                                                                                                                                                                                                                                                                                               |
| Funding                  | 22      | none       | Give the source of funding and the role of the funders for the present study and, if applicable, for the original study on which the present article is based                                                                                                                                                                                                                                                 |

\*Give information separately for cases and controls in case-control studies and, if applicable, for exposed and unexposed groups in cohort and cross-sectional studies.



1  
2  
3  
4  
5  
6  
7  
8  
9  
10  
11  
12  
13  
14  
15  
16  
17  
18  
19  
20  
21  
22  
23  
24  
25  
26  
27  
28  
29  
30  
31  
32  
33  
34  
35  
36  
37  
38  
39  
40  
41  
42  
43  
44  
45  
46  
47  
48  
49  
50  
51  
52  
53  
54  
55  
56  
57  
58  
59  
60

**Note:** An Explanation and Elaboration article discusses each checklist item and gives methodological background and published examples of transparent reporting. The STROBE checklist is best used in conjunction with this article (freely available on the Web sites of PLoS Medicine at <http://www.plosmedicine.org/>, Annals of Internal Medicine at <http://www.annals.org/>, and Epidemiology at <http://www.epidem.com/>). Information on the STROBE Initiative is available at [www.strobe-statement.org](http://www.strobe-statement.org).

For peer review only

# BMJ Open

## Physical activity among HIV-positive patients receiving antiretroviral therapy

|                                 |                                                                                                                                                                                                                                                                                                                                                                                                                                                                                                                                                                                                                                                                                                                   |
|---------------------------------|-------------------------------------------------------------------------------------------------------------------------------------------------------------------------------------------------------------------------------------------------------------------------------------------------------------------------------------------------------------------------------------------------------------------------------------------------------------------------------------------------------------------------------------------------------------------------------------------------------------------------------------------------------------------------------------------------------------------|
| Journal:                        | <i>BMJ Open</i>                                                                                                                                                                                                                                                                                                                                                                                                                                                                                                                                                                                                                                                                                                   |
| Manuscript ID                   | bmjopen-2017-020688.R1                                                                                                                                                                                                                                                                                                                                                                                                                                                                                                                                                                                                                                                                                            |
| Article Type:                   | Research                                                                                                                                                                                                                                                                                                                                                                                                                                                                                                                                                                                                                                                                                                          |
| Date Submitted by the Author:   | 22-Jan-2018                                                                                                                                                                                                                                                                                                                                                                                                                                                                                                                                                                                                                                                                                                       |
| Complete List of Authors:       | Dang, Anh; Institute for Preventive Medicine and Public Health, Hanoi Medical University<br>Nguyen, Long; School of Medicine and Pharmacy, Vietnam National University<br>Nguyen, Anh; Johns Hopkins University, School of Medicine<br>Xuan Bach, Tran; Institute for Preventive Medicine and Public Health, Hanoi Medical University, Health Economics<br>Tran, Tung; Dai Hoc Duy Tan,<br>Latkin, Carl; Johns Hopkins School of Public Health, Health, Behavior, and Society<br>Zhang, Melvyn ; Biomedical Global Institute of Healthcare Research & Technology (BIGHEART), National University of Singapore<br>Ho, Roger; National University Singapore Yong Loo Lin School of Medicine, Psychological Medicine |
| <b>Primary Subject Heading</b>: | HIV/AIDS                                                                                                                                                                                                                                                                                                                                                                                                                                                                                                                                                                                                                                                                                                          |
| Secondary Subject Heading:      | HIV/AIDS, Public health                                                                                                                                                                                                                                                                                                                                                                                                                                                                                                                                                                                                                                                                                           |
| Keywords:                       | physical activity, antiretroviral therapy, hiv/aids, Vietnam, PLWH                                                                                                                                                                                                                                                                                                                                                                                                                                                                                                                                                                                                                                                |
|                                 |                                                                                                                                                                                                                                                                                                                                                                                                                                                                                                                                                                                                                                                                                                                   |

SCHOLARONE™  
Manuscripts

## Physical activity among HIV-positive patients receiving antiretroviral therapy

Anh Kim Dang<sup>1</sup>, Long Hoang Nguyen<sup>2</sup>, Anh Quynh Nguyen<sup>3</sup>, Bach Xuan Tran<sup>1,4</sup>, Tung Thanh Tran<sup>5</sup>, Carl A. Latkin<sup>4</sup>, Melvyn WB Zhang<sup>6</sup>, Roger CM Ho<sup>7</sup>

<sup>1</sup> Institute for Preventive Medicine and Public Health, Hanoi Medical University, Hanoi, Vietnam

<sup>2</sup> School of Medicine and Pharmacy, Vietnam National University, Hanoi, Vietnam

<sup>3</sup> School of Medicine, Johns Hopkins University, Baltimore, MD, USA

<sup>4</sup> Bloomberg School of Public Health, Johns Hopkins University, Baltimore, MD, USA

<sup>5</sup> Institute for Global Health Innovations, Duy Tan University, Da Nang, Vietnam

<sup>6</sup> Biomedical Global Institute of Healthcare Research & Technology (BIGHEART), National University of Singapore, Singapore

<sup>7</sup> Department of Psychological Medicine, Yong Loo Lin School of Medicine, National University of Singapore, Singapore

Corresponding author:  
Tung Thanh Tran,  
Institute for Global Health Innovations,  
Duy Tan University, Da Nang, Vietnam, 550000  
Email: tung.ighi@gmail.com

## Abstract

**Objectives:** Antiretroviral therapy (ART) has turned HIV infection to a chronic disease, requiring patients to adhere to medications along with keeping a healthy life style to maintain their health status. Increasing in physical activity is recommended for HIV-positive patients to maintain their health. This study aimed to determine the physical activity level and its associated factors among ART patients.

**Settings:** 8 outpatient clinic sites across different levels of health systems in both rural and urban settings in Hanoi and Nam Dinh, Vietnam.

**Study design and participants:** A cross-sectional study was performed among 1,133 HIV patients receiving ART treatment during the study period.

**Primary and secondary outcome measures:** Physical activity was measured using the International Physical Activity Questionnaire (IPAQ). Socio-economic, health-related quality of life, ART adherence, ART-related characteristics were self-reported.

**Result:** About 16% of participants were inactive, 68% were health enhancing physical activity (HEPA) active. Rural participants reported a higher level of physical activity compared to urban participants. People living with HIV with longer ART duration were less likely to be physically active. Participants were more likely to have a higher IPAQ-score and classify as physically active if they were female, self-employed and blue-collar workers/farmers. Participants having higher CD4 cell count, higher EQ-5D-5L index/EQ-VAS, and sharing their health status with peers were more likely to have a higher IPAQ score or be physically active. A lower IPAQ-score was associated with urban participants and being at the symptomatic stage. In addition, participants who had poor adherence and higher duration of ART were more likely to be physically inactive.

**Conclusion:** The majority of participants on ART were physically active. Interventions to promote physical activity among PLWH in urban areas and in later ART treatment phases are needed. Peer support and job guidance have potentials in supporting the increase level of physical activity.

**Keywords:** Physical activity, antiretroviral therapy, HIV/AIDS, Vietnam, PLWH

### Strengths and limitations

- The study included a large sample size of HIV-infected patients receiving antiretroviral therapy treatment (ART) across different levels of health systems placed in both rural and urban areas.
- The study employed various validated international instruments to increase the comparability between our results and other studies elsewhere.
- The IPAQ was an subjectively self-reported measure that may under- or over-estimate the actual physical activity of PLWH.
- Convenience sampling technique was used and this may limit the generalizability of the findings as well as accurate representative of HIV/AIDS population.
- The causal inference between level of physical activity and number of CD4 cells, and physical activity and quality of life could not be established due to the cross-sectional design.

## Introduction

The use of highly active antiretroviral therapy (HAART) have achieved significant milestones in reduction of HIV/AIDS- related morbidity and mortality. According to the UNAIDS report in 2016, among 36.7 million people living with HIV (PLWH), an estimated 19.5 million patients had access to life-saving antiretroviral medicines and the global coverage of ART reached 53%<sup>1</sup>. PLWH taking potent combination antiretroviral (ARV) drug regimen enjoy longer and healthier lives<sup>1</sup>, which may transform HIV/AIDS into a chronic disease<sup>2</sup>. However, one of the most common adverse health effects of ART among PLWH was lipodystrophy syndrome<sup>3</sup> including morphologic (peripheral lipoatrophy and central fat accumulation) and metabolic (hyper-triglyceridaemia, hyper-cholesterolaemia, insulin resistance, type 2 diabetes, lactic acidaemia) symptoms<sup>4,5</sup>. It contributes to an increase in risks of cardiovascular and other non-communicable diseases as a result of changes in adipose tissue distribution and metabolism<sup>6,7</sup>. These side-effects were also found to be the main reasons for patient's non-adherence to antiretroviral medication and discontinuing the therapy<sup>8,9</sup>.

Since ART is requisite for viral suppression and recovering immune system, strategies which prevent these adverse effects and achieve optimization of treatment should be adopted<sup>10,11</sup>. Physical activity was recommended as a non-pharmacological treatment and alternative intervention<sup>12</sup>. Physical activity is defined as the movement of the body that works skeletal muscles and expend more energy than resting<sup>13</sup>. Physical activity can be categorized into subgroups such as occupation, conditioning exercises, sports, household tasks (for example cradling baby, cleaning) and other activities as well as into level of intensity included light, moderate or heavy<sup>13</sup>. Physical activity has been shown to increase functional capacity, muscle strength, joint flexibility, endurance and energy among people living with HIV<sup>14,15</sup>. Physical activity reduces the incidents of chronic diseases such as cardiovascular disease by lowering blood pressure in hypertensive patients and improving lipid lipoprotein profiles<sup>16-18</sup>; diabetes by improving glucose homeostasis<sup>19</sup>; and breast cancer<sup>20,21</sup>. Physical activity can also reverse metabolic and body composition change by lowering visceral and subcutaneous fat in the center of the body and increasing diameter of the peripheral parts, therefore prevent lipodystrophy<sup>22,23</sup>.

Engaging in physical activities is a very important health-related behavior, particularly among PLWH, because they are less likely to do physical activity compared to uninfected patients<sup>24</sup>. A typical physical activity guideline for normal adults is that they should have a minimum of 150 minutes of moderate-intensity or 75 minutes of vigorous-intensity physical activity each week or an equivalent combination of both moderate- and vigorous-intensity activity<sup>25</sup>. The Center for Disease Control and Prevention (CDC) suggests that PLWH should comply at least with this guideline to keep healthy<sup>26</sup>. However, in developing countries, the rates of physical inactivity have been shown to be more than 50% among PLWH<sup>27,28</sup> as compared to about one fourth in the United States and Australia<sup>29,30</sup>. The differences depend on various factors such as gender, age groups, occupations, level of CD4 cell count and quality of life<sup>27,28,30</sup>.

1  
2  
3 In Vietnam, most previous studies focused on physical activity among Vietnamese  
4 adolescents<sup>31 32</sup> and adults with chronic diseases and metabolic syndrome<sup>33 34</sup>. A  
5 previous study by Tan Bui et al in 2015 found that 70% of the population met the  
6 WHO recommendations of physical activity for 18 to 64-year-old adults<sup>35</sup>.  
7 Additionally,, the socioeconomic and geographical differences were considered as  
8 factors that shape behavior in physical activity. Prior studies also revealed that  
9 physical activity was greater in male compared to female<sup>35</sup> and among people who  
10 had lower educational attainment<sup>36</sup>. Furthermore, the level of physical activity in  
11 rural areas was significantly higher than in urban settings due to the modern  
12 transport system and sedentary behavior in urbanization<sup>35 37</sup>. A national  
13 representative survey with more than 14,700 participants in 2010 indicated that  
14 provinces with higher urban population proportions had less proportion of active  
15 people<sup>38</sup>. Nonetheless, the rate of urbanization in Vietnam has been escalating in  
16 recent years, from 21% in 2008 to 32% in 2013 and is projected to reach 45% in  
17 2020<sup>39</sup>. These changes raise the need for understanding the potential variability of  
18 the prevalence of physical activity or inactivity between rural and urban settings,  
19 especially among people with chronic illnesses such as HIV/AIDS and non-  
20 communicable diseases.  
21  
22

23 Currently, Vietnam is still in a concentrated HIV epidemic stage and the proportion of  
24 ART coverage is estimated approximately 42% (of people living with HIV/AIDS) in  
25 2015<sup>40</sup>, and half of them has been undergoing ART for a long time. To reduce the  
26 risk of chronic diseases and enhance the effectiveness of ART treatment, physical  
27 activity plays an important role as one of the potential intervention strategies.  
28 However, little attention has been paid to determine the degree of physical activity  
29 and intervention to enhance physical activity among individuals with HIV infection in  
30 Vietnam, particularly between urban and rural areas. According to the Vietnam  
31 Constitution in 2013, an urban area is defined as settlements with a high population  
32 density and built environment, while a rural area refers to places that have a low  
33 population density and are located outside urban settings, where people mostly work  
34 in the agriculture sector<sup>41</sup>. Based on this literature, we hypothesized that PLWH in  
35 urban area had lower level of physical activity compared to their counterparts. This  
36 study aimed to assess the level of physical activity and examine the factors  
37 associated with physically active among HIV patients receiving ART treatment  
38 across different levels of health systems and in both rural and urban settings.  
39  
40  
41

## 42 **Methods**

### 43 **Study setting and subjects**

44 A cross-sectional study was performed from January to August 2013 in Hanoi and  
45 Nam Dinh, two Vietnamese epicenters providing HIV/AIDS surveillance and  
46 treatment services in the north of Vietnam. The study was performed at 8 outpatient  
47 clinics: 5 in Hanoi and 3 in Nam Dinh. The locations included: one national hospital  
48 (Bach Mai Hospital), one provincial hospital (Nam Dinh provincial hospital), one  
49 provincial center (Nam Dinh Provincial AIDS Control Centre) and five district health  
50 centers (Hoang Mai, Long Bien, Dong Anh, Ha Dong, Xuan Truong). The eligibility  
51 criteria for selecting outpatient clinic sites in Hanoi and Nam Dinh included: 1) being  
52 representative of public health system in Vietnam which contains central-, provincial-  
53 and district- levels); 2) being able to afford ART service implemented following the  
54 official guidelines of the Vietnamese Ministry of Health<sup>42</sup>.  
55  
56  
57  
58  
59  
60

Participants were recruited using convenience sampling technique if they met the following eligibility criteria: 1) being 18 years old or above; 2) receiving ART treatment from those clinics mentioned above; 3) having a confirmatory testing of HIV-positive; 4) agreeing to participate in the study; 5) Be able to communicate with the data collectors normally. The exclusion criteria included those being suffered from serious illness during the recruitment process. We approached participants when they visited clinics for medication or to receive counseling. We identified eligible participants for the study based on the health staff's feedback. These participants were invited into a small counseling room by well-trained health workers. They were introduced to the purpose of study, the benefits and drawbacks of participating, and were then asked to join the study. If they agreed, participants signed a written informed consent. We ensured participants of the confidentiality of their participation in the study. The consent process took place in a comfortable room with restricted access, allowing participants privacy as they decided whether or not to join the project. A total of 1200 patients were invited to participate into the study, but only 1133 patients agreed to enroll. The reasons for refusal included insufficient health, discomfort or having busy work schedule.

### **Measures and instruments**

Participants were invited to participate in 20-minute face-to-face interviews. Data were ascertained through an interview-administered questionnaire conducted by data collectors who were medical students at Hanoi Medical University and experts in HIV-related fields. We did not involve health staff in collecting data to avoid social desirability bias. We developed a structured questionnaire with following information:

#### **Socioeconomic characteristics**

We asked participants to report their socioeconomic information included gender (male/female), education attainment (illiterate/ elementary/ secondary/ high school/ vocational training/ university), age, marital status (single/ live with spouse/ live with partner/ divorced/ widow), religion (cult of ancestors/ Buddhism/ Catholic/ Protestant), and employment status (Unemployed/ Self-employed/ White-collar/ Blue-collar or farmer/ Others).

#### **ART – related characteristics**

Self-reports about the latest CD4 cell count, HIV stages (including 1) asymptomatic – patients without HIV-related symptoms, 2) symptomatic - patients having HIV-related clinical symptoms without AIDS indicators, and 3) AIDS <sup>43</sup>) and ART treatment duration were collected from participants. Data on viral load were not collected due to their unavailability at the study period. Non-adherence to ART was measured by self-report items. First, ART adherence last month was determined by visual analog scale (VAS) where 0-point showed complete non-adherence and 100-point showed complete adherence <sup>44</sup>. Participants were asked whether they forget to take ART medicine in the last four days. This approach has been applied successfully in a previous study <sup>45</sup>. We also asked the participants about whether they received peer support during ART treatment (Yes/No), and whether they shared their health status with their peers or not (Yes/No).

#### **Health – related quality of life**

HRQOL was measured using the EQ-5D-5L instrument in the Vietnamese version, which was validated elsewhere <sup>46</sup>. This tool measures five dimensions including



1  
2  
3 mobility, self-care, usual activities, pain/discomfort and anxiety/ depression with five  
4 response levels: no problems, slight problems, moderate problems, severe  
5 problems, and extreme problems. The combination of responses gives 3125 health  
6 states with weighting to have aggregate single index<sup>46</sup>. Cronbach's alpha of this  
7 instrument was 0.85 with good convergent validity<sup>46</sup>. Furthermore, we also use the  
8 EQ-VAS (visual analogue scale) which measures the self-rated health on a 20-cm  
9 vertical scale, with the endpoint ranges from 0 to 100 point, labeled 'the worst health  
10 you can imagine' and 'the best health you can imagine'<sup>47</sup>.  
11

### 12 13 **Physical activity**

14 To assess level of physical activity of participants, we used the International Physical  
15 Activity Questionnaire (IPAQ). The IPAQ is developed to use in adults (15-69 years  
16 old)<sup>48</sup>. Several questions were used to assess three specific types of activity:  
17 vigorous activity, moderate activity and walking activity. Examples of each type of  
18 activity in our research context are listed below:  
19

- 20 - Vigorous activity: Heavy lifting, hoeing, weight lifting, fast paced cycling, etc.
- 21 - Moderate activity: Playing badminton, slow paced cycling, cradling baby,  
22 selling, etc.
- 23 - Walking activity: Going to work, going to school, going elsewhere, going  
24 jogging, etc.  
25

26 Each activity was scored separately by frequency (measured by days per week) and  
27 duration (measured by time per day). Volume of each activity was also measured by  
28 its energy requirements determined in METs (METs are multiple of the resting  
29 metabolic rate)<sup>48</sup>.  
30

31 The total IPAQ score was used as a continuous variable which was calculated by  
32 adding the MET minute per week of three types of activity. We also evaluated the  
33 IPAQ score as categorical variable which divided their physical activity into 3 levels:  
34 Inactive, minimally active and HEPA active.  
35

36 Participants were categorized into (1) HEPA (health enhancing physical activity)  
37 active group if they did:

- 38 - vigorous activity on at least 3 days obtaining total physical activity of at least  
39 1500 MET-minutes/week;
- 40 - OR 7 or more days of combination between days of walking and days of  
41 moderate-intensity or vigorous activities obtaining total physical activity of at  
42 least 3000 MET-minutes/week.  
43

44 Participants were in (2) Minimally active group if they had

- 45 - 3 or more days of vigorous activity of at least 20 minutes per day (800 MET-  
46 minutes/week)
- 47 - OR 5 or more days of moderate activity or walking of at least 30 minutes per  
48 day
- 49 - OR 5 or more days of walking combining with moderate-intensity or vigorous  
50 intensity activities obtaining at least 600 MET-min/week.  
51

52  
53 Participants were (3) Inactive if Individuals who not meet requirements for  
54 Categories 2 or 3 were determined as insufficiently active<sup>48</sup>.  
55  
56  
57  
58  
59

### Statistical analysis

Data were analyzed by STATA version 12 (Stata Corp. LP, College Station, United States of America). Chi-square test and Mann Whitney test was used for demographic characteristics of participants as well as HRQOL, ART status and sexual behaviors. Multivariate linear regression was employed to identify factors associated with IPAQ score. Because the IPAQ score had non-normal distribution, we performed log-transformation for this variable in order to meet the requirement of regression model. We also applied multivariate logistic regression to identify factors associated with whether the participants were active in physical activity or not. We applied forward stepwise selection strategy to remove non-significant factors, the p-value of log likelihood ratio test was set as less than 0.1 and this was the threshold to include a variable. A p-value <0.05 was considered as statistical significance.

### Ethics approval

The study protocol was reviewed and ethics approval was granted by the Vietnam Authority of HIV/AIDS Control's Scientific Research Committee. Participants confidently participated in the study and signed a written informed consent after receiving clearly introduction about the benefits and drawbacks of the study. The consent process took place in a room with restricted access. Participants can withdraw from the interview at any time and this did not affect their current treatment.

### Results

The demographic and socioeconomic characteristics of participants living in rural and urban are given in **Table 1**. A total of 1,133 participants agreed to enroll in this study. Out of 1,133 ART patients, approximately 60% was male. The majority had secondary and high school education (36.9% and 32% respectively); participants in urban areas had higher education than people in rural area ( $p=0.04$ ). The marital status and employment were also significant different between rural and urban group ( $p<0.01$ ). There was no difference of age group between rural and urban participants.

**Table 1: Socio-economic characteristic of PLWH in the study (n=1133)**

|                       | Rural |      | Urban |      | Total |      | p-value           |
|-----------------------|-------|------|-------|------|-------|------|-------------------|
|                       | n     | %    | n     | %    | n     | %    |                   |
| <b>Gender</b>         |       |      |       |      |       |      |                   |
| Male                  | 145   | 56.2 | 520   | 59.4 | 665   | 58.7 | 0.36 <sup>†</sup> |
| Female                | 113   | 43.8 | 355   | 40.6 | 468   | 41.3 |                   |
| <b>Education</b>      |       |      |       |      |       |      |                   |
| Illiterate            | 5     | 1.9  | 7     | 0.8  | 12    | 1.1  | 0.04 <sup>†</sup> |
| Elementary school     | 48    | 18.6 | 172   | 19.7 | 220   | 19.4 |                   |
| Secondary school      | 109   | 42.3 | 309   | 35.3 | 418   | 36.9 |                   |
| High school           | 80    | 31   | 282   | 32.2 | 362   | 32   |                   |
| Vocational training   | 6     | 2.3  | 48    | 5.5  | 54    | 4.8  |                   |
| University            | 10    | 3.9  | 57    | 6.5  | 67    | 5.9  |                   |
| <b>Marital status</b> |       |      |       |      |       |      |                   |
| Single                | 26    | 10.1 | 143   | 16.3 | 169   | 14.9 | 0.01 <sup>†</sup> |
| Live with spouse      | 178   | 69   | 507   | 57.9 | 685   | 60.5 |                   |
| Live with partner     | 0     | 0    | 8     | 0.9  | 8     | 0.7  |                   |
| Divorced              | 22    | 8.5  | 66    | 7.5  | 88    | 7.8  |                   |
| Widow                 | 32    | 12.4 | 151   | 17.3 | 183   | 16.2 |                   |
| <b>Religion</b>       |       |      |       |      |       |      |                   |

|                              | Rural       |           | Urban       |           | Total       |           | p-value            |
|------------------------------|-------------|-----------|-------------|-----------|-------------|-----------|--------------------|
|                              | n           | %         | n           | %         | n           | %         |                    |
| Cult of ancestors            | 222         | 86.1      | 779         | 89        | 1,001       | 88.4      | 0.03 <sup>†</sup>  |
| Buddhism                     | 12          | 4.7       | 43          | 4.9       | 55          | 4.9       |                    |
| Catholic                     | 24          | 9.3       | 44          | 5         | 68          | 6         |                    |
| Protestant                   | 0           | 0         | 9           | 1         | 9           | 0.8       |                    |
| <b>Employment</b>            |             |           |             |           |             |           |                    |
| Unemployed                   | 47          | 18.2      | 184         | 21        | 231         | 20.4      | <0.01 <sup>†</sup> |
| Self-employed                | 98          | 38        | 371         | 42.4      | 469         | 41.4      |                    |
| White-collar worker          | 13          | 5         | 67          | 7.7       | 80          | 7.1       |                    |
| Blue-collar worker or farmer | 94          | 36.4      | 188         | 21.5      | 282         | 24.9      |                    |
| Others                       | 6           | 2.3       | 65          | 7.4       | 71          | 6.3       |                    |
|                              | <b>Mean</b> | <b>SD</b> | <b>Mean</b> | <b>SD</b> | <b>Mean</b> | <b>SD</b> |                    |
| <b>Age</b>                   | 35.6        | 6.6       | 35.5        | 7.0       | 35.5        | 6.9       | 0.6 <sup>¶</sup>   |

Significance level was  $p < 0.05$

<sup>†</sup>Chi-square test

<sup>¶</sup>Mann Whitney test

### Antiretroviral therapy status

About half of participants were asymptomatic and the proportion of rural participants unaware of their stage of HIV infection was significantly higher than urban participants (52.1% vs 24.7%) (**Table 2**). The mean number of CD4 measurements and duration of ART treatment were 294.7 cells/ $\mu$ L (SD=215.2) and 3.5 years (SD=2.2) respectively. About 50% of participants shared health status with their peers and only one-third received peer support.

**Table 2: Antiretroviral therapy status of participants (n=1133)**

|                                                       | Rural       |           | Urban       |           | Total       |           | p-value            |
|-------------------------------------------------------|-------------|-----------|-------------|-----------|-------------|-----------|--------------------|
|                                                       | n           | %         | n           | %         | n           | %         |                    |
| <b>HIV period</b>                                     |             |           |             |           |             |           |                    |
| Asymptomatic                                          | 67          | 28.4      | 389         | 46        | 456         | 42.1      | <0.01 <sup>†</sup> |
| Symptomatic                                           | 32          | 13.6      | 161         | 19        | 193         | 17.8      |                    |
| AIDS                                                  | 14          | 5.9       | 87          | 10.3      | 101         | 9.3       |                    |
| Unknown                                               | 123         | 52.1      | 209         | 24.7      | 332         | 30.7      |                    |
| <b>ART duration (year)</b>                            |             |           |             |           |             |           |                    |
| 1 year                                                | 47          | 19.0      | 213         | 26.9      | 260         | 25.0      | <0.01 <sup>†</sup> |
| 2 – 4 years                                           | 91          | 36.9      | 354         | 44.7      | 445         | 42.8      |                    |
| More than 4 years                                     | 109         | 44.1      | 225         | 28.4      | 334         | 32.2      |                    |
| <b>Share health status with peers</b>                 |             |           |             |           |             |           |                    |
| Yes                                                   | 110         | 43.3      | 446         | 52.7      | 556         | 50.6      | 0.01 <sup>†</sup>  |
| No                                                    | 144         | 56.7      | 400         | 47.3      | 544         | 49.5      |                    |
| <b>Receiving peer support</b>                         |             |           |             |           |             |           |                    |
| Yes                                                   | 77          | 29.8      | 314         | 35.9      | 391         | 34.5      | 0.07 <sup>†</sup>  |
| No                                                    | 181         | 70.2      | 561         | 64.1      | 742         | 65.5      |                    |
| <b>Forgetting to take medicine in the last 4 days</b> |             |           |             |           |             |           |                    |
| No                                                    | 243         | 98        | 780         | 97.7      | 1,023       | 97.8      | 0.82 <sup>†</sup>  |
| Yes                                                   | 5           | 2         | 18          | 2.3       | 23          | 2.2       |                    |
|                                                       | <b>Mean</b> | <b>SD</b> | <b>Mean</b> | <b>SD</b> | <b>Mean</b> | <b>SD</b> |                    |
| <b>ART Duration (year)</b>                            | 4.0         | 2.4       | 3.3         | 2.1       | 3.5         | 2.2       | <0.01 <sup>¶</sup> |
| <b>CD4 cell count</b>                                 | 312.5       | 220.6     | 289.2       | 213.4     | 294.7       | 215.2     | 0.08 <sup>¶</sup>  |

|                            | Rural |     | Urban |    | Total |      | p-value           |
|----------------------------|-------|-----|-------|----|-------|------|-------------------|
|                            | n     | %   | n     | %  | n     | %    |                   |
| <b>ART adherence (VAS)</b> | 94.8  | 8.2 | 93.9  | 11 | 94.1  | 10.4 | 0.55 <sup>¶</sup> |

Significance level was  $p < 0.05$

<sup>†</sup>Chi-square test

<sup>¶</sup>Mann Whitney test

### Self-reported health status

The percentage of urban participants having any problem in mobility, self-care, doing usual activities were significant higher than those of rural participants ( $p < 0.01$ ) (**Table 3**). About 40% of participants suffered from anxiety or depression, and about half of the participants suffered from pain or discomfort, with no significant difference between rural and urban participants. The mean EQ-5D-5L index was 0.8 (SD=0.2) and the perceived EQ-VAS score among rural participants was statistically significantly higher than those of urban participants ( $p < 0.01$ ).

**Table 3: Health status among participants (n=1133)**

|                                             | Rural       |           | Urban       |           | Total       |           | p-value               |
|---------------------------------------------|-------------|-----------|-------------|-----------|-------------|-----------|-----------------------|
|                                             | n           | %         | n           | %         | n           | %         |                       |
| <b>Self-reported health problems</b>        |             |           |             |           |             |           |                       |
| Mobility                                    | 33          | 12.8      | 199         | 22.7      | 232         | 20.5      | $< 0.01$ <sup>†</sup> |
| Self-care                                   | 12          | 4.7       | 98          | 11.2      | 110         | 9.7       | $< 0.01$ <sup>†</sup> |
| Usual Activities                            | 26          | 10.1      | 162         | 18.5      | 188         | 16.6      | $< 0.01$ <sup>†</sup> |
| Pain or Discomfort                          | 85          | 33.0      | 342         | 39.1      | 427         | 37.7      | 0.07 <sup>†</sup>     |
| Anxiety or Depression                       | 104         | 40.3      | 405         | 46.3      | 509         | 44.9      | 0.09 <sup>†</sup>     |
| <b>Complications and concurrent disease</b> |             |           |             |           |             |           |                       |
|                                             | 76          | 29.5      | 329         | 37.6      | 405         | 35.8      | 0.02 <sup>†</sup>     |
|                                             | <b>Mean</b> | <b>SD</b> | <b>Mean</b> | <b>SD</b> | <b>Mean</b> | <b>SD</b> |                       |
| <b>EQ-5D-5L index</b>                       | 0.8         | 0.2       | 0.8         | 0.3       | 0.8         | 0.2       | 0.18 <sup>¶</sup>     |
| <b>EQ-VAS</b>                               | 70.1        | 16.0      | 68.4        | 17.6      | 68.8        | 17.3      | $< 0.01$ <sup>¶</sup> |

Significance level was  $p < 0.05$

<sup>†</sup>Chi-square test

<sup>¶</sup>Mann Whitney test

### Physical activity level

Sixteen percent of participants were inactive and 68% of participants were HEPA active using the IPAQ (**Table 4**). Rural participants reported statistically higher level of physical activity and IPAQ score compared to urban participants ( $p = 0.03$  and  $p < 0.01$  respectively). Regarding moderate activity, number of days per week and mean value of MET-score among participants living in rural areas were higher than those in urban areas ( $p < 0.01$  and  $p = 0.01$  respectively). However, mean MET-score of vigorous activity and walking activity were similar between two groups.

**Table 4: Physical activity levels of participants**

|  | Rural |   | Urban |   | Total |   | p-value |
|--|-------|---|-------|---|-------|---|---------|
|  | n     | % | n     | % | n     | % |         |

**Level of physical activity**

|                          |               |              |               |              |               |               |                             |
|--------------------------|---------------|--------------|---------------|--------------|---------------|---------------|-----------------------------|
| Inactive                 | 29            | 11.3         | 152           | 17.4         | 181           | 16.0          | <b>0.03<sup>†</sup></b>     |
| Minimally active         | 37            | 14.3         | 144           | 16.4         | 181           | 16.0          |                             |
| HEPA active              | 192           | 74.4         | 579           | 66.2         | 771           | 68.0          |                             |
|                          | <b>Mean</b>   | <b>SD</b>    | <b>Mean</b>   | <b>SD</b>    | <b>Mean</b>   | <b>SD</b>     |                             |
| <b>Vigorous activity</b> |               |              |               |              |               |               |                             |
| Days per week            | 1.5           | 0.2          | 1.2           | 0.1          | 1.3           | 2.5           | 0.09 <sup>¶</sup>           |
| Minutes per day          | 95.4          | 11.2         | 81.1          | 6            | 84.4          | 177.6         | 0.15 <sup>¶</sup>           |
| MET-score                | 4360.9        | 555.5        | 3444.4        | 282.5        | 3651.9        | 8465.9        | 0.11 <sup>¶</sup>           |
| <b>Moderate activity</b> |               |              |               |              |               |               |                             |
| Days per week            | 5.4           | 0.2          | 4.8           | 0.1          | 4.9           | 2.8           | <b>&lt;0.01<sup>¶</sup></b> |
| Minutes per day          | 170.2         | 5.7          | 155.9         | 3.3          | 159.1         | 96            | 0.04 <sup>¶</sup>           |
| MET-score                | 4211.3        | 165.7        | 3737.9        | 92.2         | 3845.9        | 2711.1        | <b>0.01<sup>¶</sup></b>     |
| <b>Walking activity</b>  |               |              |               |              |               |               |                             |
| Days per week            | 3.4           | 0.2          | 3.3           | 0.1          | 3.4           | 3.3           | 0.67 <sup>¶</sup>           |
| Minutes per day          | 18.6          | 1.8          | 21.8          | 1.3          | 21.1          | 36.8          | 0.99 <sup>¶</sup>           |
| MET-score                | 377.1         | 38.3         | 451.5         | 29.3         | 434.6         | 816.3         | 0.87 <sup>¶</sup>           |
| <b>IPAQ Score</b>        | <b>8977.9</b> | <b>535.5</b> | <b>7613.5</b> | <b>280.5</b> | <b>7922.9</b> | <b>8333.8</b> | <b>&lt;0.01<sup>¶</sup></b> |

Number of total participants,  $n=1133$

Significance level was  $p<0.05$

<sup>†</sup>Chi-square test and

<sup>¶</sup>Mann Whitney test

**Figure 1** shows that IPAQ score differentially associated with ART treatment duration. A higher IPAQ score was associated with a shorter antiretroviral therapy (ART) duration; longer antiretroviral therapy (ART) treatment was associated with a lower IPAQ score. Specifically, it increased within the first year of ART, plateaued during 2 to 4 years of treatment, and then decreased.

**Factors associated with level of activity**

Participants were more likely to have a higher IPAQ-score and classify as active in physical activity if they were female, self-employed and were blue-collar workers or farmers (**Table 5**). Participants who had a higher CD4 cell count, shared their health status with their peers, and reported a higher EQ-5D-5L index/EQ-VAS were also more likely to have higher IPAQ score or be active in physical activity. By contrast, a lower IPAQ-score was associated with living in urban areas and being at the symptomatic stage. In addition, participants who had poor adherence and higher duration of ART were more likely to be inactive in physical activity.

**Table 5: Factors associated with levels of physical activity among antiretroviral therapy patients in Vietnam in 2013**

|                                             | IPAQ-score |              | Active |            |
|---------------------------------------------|------------|--------------|--------|------------|
|                                             | Coef.      | 95 CI        | OR     | 95 CI      |
| <b>Gender (Female vs Male)</b>              | 0.25*      | 0.11; 0.39   | 2.53*  | 1.58; 4.07 |
| <b>Living location (Urban vs Rural)</b>     | -0.17*     | -0.34; -0.01 | 0.60   | 0.35; 1.05 |
| <b>Education attainment (vs Illiterate)</b> |            |              |        |            |

|                                                                   |        |              |       |             |
|-------------------------------------------------------------------|--------|--------------|-------|-------------|
| High school                                                       |        |              | 1.52  | 0.94; 2.46  |
| <b>Religion (vs Cults of Ancestor)</b>                            |        |              |       |             |
| Buddhism                                                          |        |              | 2.78  | 0.73; 10.57 |
| <b>Occupation (vs Unemployed)</b>                                 |        |              |       |             |
| Self-employed                                                     | 0.60*  | 0.41; 0.79   | 2.98* | 1.78; 4.99  |
| White-collar workers                                              | 0.29   | -0.02; 0.59  | 2.43  | 0.87; 6.79  |
| Blue-collar worker/farmers                                        | 0.73*  | 0.52; 0.94   | 2.24* | 1.27; 3.95  |
| Others                                                            | 0.53*  | 0.22; 0.84   | 3.28* | 1.07; 10.05 |
| <b>EQ-5D index</b>                                                |        |              | 4.49* | 1.68; 12.02 |
| <b>EQ-VAS</b>                                                     | 0.01*  | 0.00; 0.01   | 1.02* | 1.00; 1.03  |
| <b>Current CD4 cell count</b>                                     | 0.01*  | 0.00; 0.01   | 1.02* | 1.01; 1.03  |
| <b>ART duration</b>                                               |        |              | 0.91* | 0.82; 0.98  |
| <b>HIV Stages (vs Asymptomatic)</b>                               |        |              |       |             |
| Symptomatic                                                       | -0.20* | -0.38; -0.01 |       |             |
| AIDS                                                              |        |              | 1.81  | 0.87; 3.79  |
| <b>Forgetting to take medicine in the last 4 days (Yes vs No)</b> |        |              | 0.26* | 0.09; 0.80  |
| <b>Share health status with peers (Yes vs No)</b>                 | 0.26*  | 0.12; 0.40   | 1.86* | 1.21; 2.84  |

\* $p < 0.05$ ; OR: Odds Ratio; 95% CI: 95% Confidence Interval

## Discussion

Findings of this study suggest that PLWH in urban areas had lower level of physical activity compared to their peer in rural settings. In our study, a majority of ART patients achieved HEPA active in physical activity. By using multivariate regression models, we found a number of sociodemographic, clinical and social factors that are associated with the level of physical activity among PLWH in Vietnam. These results will contribute significantly to the development of tailored interventions to boost the physical activity among this population in the future.

Compared to previous studies on ART patients using the IPAQ system, the percentage of inactive (16%) or minimally active (16%) participants in our study was much lower<sup>12 27 29 30</sup>. Most participants reported the highest frequency of moderate activity (playing sport, cycling, cradling baby, etc.), which is different from previous studies founding that walking was the most preferred physical activity among PLWH<sup>14 30</sup>. These activities can positively affect PLWH by decreasing side-effects associated with HIV/AIDS and cardio-metabolic complications accompanied with ART treatment<sup>15 49</sup>. However, a number of participants in our study had difficulty in mobility which limited their ability to engage in healthy physical activities regardless of living location. Therefore, the health staff could provide alternative methods of exercising such as passive motion exercise, hydrotherapy or stationary cycling which is found to be just as effective for enhancing functional fitness as active exercise practice<sup>50</sup>.

The total physical activity score in rural area was higher than in urban areas in our study, which is consistent with the physical activity level of the general Vietnamese population<sup>35</sup>. Some environmental factors in rural areas such as sidewalk conditions, the availability of exercise equipment and sedentary behavior in

1  
2  
3 urbanization may affect individual willingness to take part in physical activity<sup>37 51</sup>.  
4 Meanwhile, in Vietnam, the main occupations in rural areas were farming and blue-  
5 collar works in which rural participants often viewed working on farm or heavy  
6 working conditions as vigorous and moderate physical activities. However, MET-  
7 score obtained by walking activity was the smallest and this did not differ between  
8 rural and urban areas. This can be explained by factors such as low residential  
9 density and long distances between destinations in rural areas that may discourage  
10 people from walking<sup>52</sup>. Similarly, in urban settings, walking intensity could be  
11 influenced by the presence of pedestrian infrastructure such as sidewalk as well as  
12 safety concerns from crime or traffic flow<sup>53</sup>.  
13

14  
15 Our study also found that participants who were unemployed were less likely to be  
16 physically active, which concurs with prior findings<sup>54 55</sup>. Unemployed patients are  
17 less likely to obtain adequate physical activity because occupational activity is  
18 concerned as a vital component of daily physical activity in adulthood<sup>56-58</sup>. In  
19 addition, our study found that female respondents were more likely to get a higher  
20 level of physical activity. This can be explained by the fact that in the traditional  
21 Vietnamese culture, women still have many responsibilities of taking care of their  
22 children and all household activities, which were mainly classified as moderate  
23 physical activity in our study<sup>59 60</sup>.  
24

25  
26 Interestingly, we found that people with higher duration of ART were less likely to be  
27 physically active. Notably, this association was found as a non-linear relationship.  
28 This is likely because patients had to adapt with rigorous adherence during the  
29 initiation of their treatment, which might enhance their willingness to involve in  
30 physical activities<sup>45 61 62</sup>. However, the later reduction can be supposed that patients  
31 became complacent when their health status recovered, and less motivated to  
32 comply with strict physical regimen<sup>45 61</sup>. Findings from another study emphasized  
33 the role of age in relationships between advanced HIV disease and worsen physical  
34 function<sup>24</sup>. As prolonged ART treatment has been positively associated with an  
35 accelerated aging process, age-related comorbidity may reduce the level of physical  
36 activity intensity<sup>24</sup>. However, in this study, the influence of age on physical activity  
37 was not statistically significant since it was dropped out of multivariate regression  
38 model. We also observed that non-adherence to ART was associated with a  
39 physically inactive status. Other studies also reveal that low level of physical activity  
40 has been found to be significantly related to low antiretroviral medication adherence  
41<sup>61 63</sup>. This finding can be explained by the fact that physical activity can reduce  
42 depressive symptomatology which may lead to optimal ART adherence<sup>63</sup>.  
43  
44

45  
46 In this study, we combined both EQ-5D-5L and EQ-VAS instruments due to the  
47 variation of health utility scores based on different instruments<sup>64</sup>. EQ-VAS is a self-  
48 reported instrument that directly assesses perceived health status of patients in  
49 short-term. Meanwhile, EQ-5D index is composited by five domains that indirectly  
50 measures quality of life in long-term<sup>65</sup>. In the short-term, patients' hope for improving  
51 their health condition might influence their perceived health status. On the other  
52 hand, in the long-term, because of the acclimation with their health status, patients  
53 tend to report quality of life more accurately<sup>64</sup>. In term of health status, participants  
54 with higher quality of life and higher number of CD4 cell count had higher IPAQ  
55 score, while participants at symptomatic stage had lower IPAQ score compared to  
56 those having asymptomatic stage. We supposed that physical activity would help  
57  
58  
59  
60

1  
2  
3 patients to improve and maintain their strength and quality of life. Two systemic  
4 reviews by O'Brien et al in 2016 and 2017 found that exercises including aerobic and  
5 resistive or a combination performed at least three times per week for at least five  
6 weeks may lead to improvements in cardiopulmonary fitness, strength, weight and  
7 body composition and quality of life among PLWH who are medically stable.<sup>66 67</sup>  
8

9 Our current study suggested that participants who shared health status with their  
10 peers were more likely to have a higher IPAQ score. The association between peer  
11 supports and physical activity was investigated by Jerome et al (2012) which found  
12 that peer support was an important determinant to assist patients in adherence to  
13 exercise programs<sup>68</sup>. Additionally, WHO, PEPFAR and Global Fund have proposed  
14 that social support should be considered as an effective adjunct in improving  
15 physical health among PLWH receiving ART treatment<sup>69 70</sup>. As PLWH were more  
16 vulnerable and withdrawn from social situations<sup>71</sup>, peer support can promote  
17 patients' health through sharing relevant personal experiences to acquire knowledge,  
18 reduce stigma and discrimination, improve physical functioning, and enhance  
19 retention in ART treatment<sup>72-74</sup>.  
20  
21

22 Several implications can be drawn from this study. First, providing different physical  
23 activity strategies based on rural and urban settings is needed to improve health  
24 status of PLWH in these areas. For example, the health staff in clinics may organize  
25 some outdoor activities via peer educators/groups to engage urban patients in  
26 physical activity. Second, job opportunities and vocational training should be  
27 prioritized to promote physically active among ART patients<sup>54 55</sup>. Third, the reduction  
28 in IPAQ score observed in prolonged ART duration suggests that physical health  
29 assessments and appropriate physical activity programs such as resistance trainings  
30 and aerobic exercises should be in place. Additionally, passive motion exercise  
31 should be considered for immobilized patients or who had difficulty in mobility or  
32 physical impairments<sup>50</sup>. Fourth, given the association between the level of physical  
33 activity and ART treatment status from our findings, integrative intervention including  
34 physical activity, ART medication adherence and health related quality of life may  
35 prove to be efficient and cost-effective<sup>63</sup>. Finally, promoting social support,  
36 especially among peers should be prioritized to enables HIV patients to share their  
37 experiences that motivate others to be involved in physical activity<sup>68</sup>. Furthermore,  
38 peer support groups integrated into assigned health facilities would be useful to  
39 patients who are at the initial ART medication stage.  
40  
41

42 The strengths of this study included the large sample size of HIV-infected patients  
43 receiving antiretroviral therapy treatment, which increased the statistic power of the  
44 result. Additionally, we recruited participants from different levels of health systems  
45 (central, provincial and district ART clinics) in both rural and urban areas, which  
46 made the sample more representative of the general Vietnamese population. We  
47 also employed international instruments such as IPAQ and EQ-5D-5L, which help to  
48 increase the comparability between our results and other global studies.  
49  
50

51 However, several limitations should be acknowledged. Firstly, the convenience  
52 sampling technique was used, which may limit the generalizability of our findings to  
53 other settings and patient populations. Secondly, because collected data was based  
54 on self-reported information, it is susceptible to be influences by interviewers, social  
55 desirability and recall bias. To minimize these biases, interviewers affiliated with  
56  
57  
58  
59  
60



1  
2  
3 selected health centers were excluded from the study and patients were given clear  
4 instructions on the benefits and drawbacks of the study. Thirdly, the causal  
5 inferences could not be established due to the cross-sectional design. Finally, some  
6 barriers to physically active such as social factors (stigma, discrimination), family  
7 support or clinical settings (healthcare providers) were not fully addressed in this  
8 study, warranting further research to elucidate these gaps.  
9

### 10 **Conclusion**

11 In conclusion, findings from this study suggests for some potential interventions to  
12 improve the health status and quality of life for HIV patients receiving ART in rural  
13 and urban Vietnam. More studies of different populations in different settings are  
14 needed to confirm the positive association between high level of physical activity and  
15 ART adherence. Intervention focusing on promoting physical activities for PLWH  
16 should take into consideration of the location and external environment of the target  
17 population. Furthermore, peer support and job guidance for PLWH also have great  
18 potentials to increase their level of physical activity.  
19  
20  
21  
22  
23  
24  
25  
26  
27  
28  
29  
30  
31  
32  
33  
34  
35  
36  
37  
38  
39  
40  
41  
42  
43  
44  
45  
46  
47  
48  
49  
50  
51  
52  
53  
54  
55  
56  
57  
58  
59  
60

## LIST OF ABBREVIATION

ART: Antiretroviral Therapy

PLWH: People Living With HIV

WHO: World Health Organization

PEPFAR: President's Emergency Plan For AIDS Relief

## ACKNOWLEDGEMENTS

The authors would like to acknowledge supports by the Vietnam Authority of HIV/AIDS Control and Hanoi Provincial AIDS Centers for the acceptance to implement the study. There was no funding for this analysis.

### Funding

There was no funding for this analysis

### Authors' Contributions

AKD, LHN, AQN, BXT, TTT, CAL, MWBZ, RCMH conceived of the study, and participated in its design and implementation and wrote the manuscript. AKD, LHN, BXT, analysed the data. All authors read and approved the final manuscript.

### Competing interests

The authors declare that they have no competing interests.

### Data sharing statement

The data that support the findings of this study are available from the Vietnam Authority of HIV/AIDS Control but restrictions apply to the availability of these data, which were used under license for the current study, and so are not publicly available. Data are however available from the authors upon reasonable request and with permission of the Vietnam Authority of HIV/AIDS Control.

## References

1. UNAIDS. Global AIDS Update 2016, 2016.
2. Grossman HA, Sullivan PS, Wu AW. Quality of life and HIV: current assessment tools and future directions for clinical practice. *AIDS Read* 2003;13(12):583-90, 95-7.
3. Saves M, Raffi F, Capeau J, et al. Factors related to lipodystrophy and metabolic alterations in patients with human immunodeficiency virus infection receiving highly active antiretroviral therapy. *Clin Infect Dis* 2002;34(10):1396-405. doi: 10.1086/339866
4. Carr A, Cooper DA. Adverse effects of antiretroviral therapy. *The Lancet* 2000;356(9239):1423-30. doi: [http://dx.doi.org/10.1016/S0140-6736\(00\)02854-3](http://dx.doi.org/10.1016/S0140-6736(00)02854-3)
5. Montessori V, Press N, Harris M, et al. Adverse effects of antiretroviral therapy for HIV infection. *CMAJ* 2004;170(2):229-38.
6. Mutimura E, Stewart A, Rheeder P, et al. Metabolic function and the prevalence of lipodystrophy in a population of HIV-infected African subjects receiving highly active antiretroviral therapy. *J Acquir Immune Defic Syndr* 2007;46(4):451-5.
7. Potthoff A, Brockmeyer NH, Gelbrich G, et al. Lipodystrophy - a sign for metabolic syndrome in patients of the HIV-HEART study. *J Dtsch Dermatol Ges* 2010;8(2):92-8. doi: 10.1111/j.1610-0387.2009.07330.x
8. O'Brien ME, Clark RA, Besch CL, et al. Patterns and correlates of discontinuation of the initial HAART regimen in an urban outpatient cohort. *J Acquir Immune Defic Syndr* 2003;34(4):407-14.
9. Gebrezgabher BB, Kebede Y, Kindie M, et al. Determinants to antiretroviral treatment non-adherence among adult HIV/AIDS patients in northern Ethiopia. *AIDS Research and Therapy* 2017;14(1):16. doi: 10.1186/s12981-017-0143-1
10. Wilson EM, Sereti I. Immune restoration after antiretroviral therapy: the pitfalls of hasty or incomplete repairs. *Immunol Rev* 2013;254(1):343-54. doi: 10.1111/imr.12064
11. Bradley H, Mattson CL, Beer L, et al. Increased antiretroviral therapy prescription and HIV viral suppression among persons receiving clinical care for HIV infection. *AIDS* 2016;30(13):2117-24. doi: 10.1097/QAD.0000000000001164
12. Segatto AFM, Freitas Junior IF, Santos VRd, et al. Lipodystrophy in HIV/AIDS patients with different levels of physical activity while on antiretroviral therapy. *Revista da Sociedade Brasileira de Medicina Tropical* 2011;44:420-24.
13. Caspersen CJ, Powell KE, Christenson GM. Physical activity, exercise, and physical fitness: definitions and distinctions for health-related research. *Public Health Rep* 1985;100(2):126-31.
14. Clingerman EM. Participation in physical activity by persons living with HIV disease. *J Assoc Nurses AIDS Care* 2003;14(5):59-70. doi: 10.1177/1055329003255284
15. Hand GA, Lyerly GW, Jagers JR, et al. Impact of Aerobic and Resistance Exercise on the Health of HIV-Infected Persons. *Am J Lifestyle Med* 2009;3(6):489-99. doi: 10.1177/1559827609342198
16. Rowland TW. The role of physical activity and fitness in children in the prevention of adult cardiovascular disease. *Prog Pediatr Cardiol* 2001;12(2):199-203.
17. Warburton DE, Glendhill N, Quinney A. The effects of changes in musculoskeletal fitness on health. *Can J Appl Physiol* 2001;26(2):161-216.
18. Buttar HS, Li T, Ravi N. Prevention of cardiovascular diseases: Role of exercise, dietary interventions, obesity and smoking cessation. *Exp Clin Cardiol* 2005;10(4):229-49.
19. Boule NG, Haddad E, Kenny GP, et al. Effects of exercise on glycemic control and body mass in type 2 diabetes mellitus: a meta-analysis of controlled clinical trials. *Jama* 2001;286(10):1218-27.
20. Kruk J. Physical activity in the prevention of the most frequent chronic diseases: an analysis of the recent evidence. *Asian Pacific journal of cancer prevention : APJCP* 2007;8(3):325-38.

21. Lynch BM, Neilson HK, Friedenreich CM. Physical activity and breast cancer prevention. *Recent Results Cancer Res* 2011;186:13-42. doi: 10.1007/978-3-642-04231-7\_2
22. Mendes EL, Ribeiro Andaki AC, Brito CJ, et al. Beneficial effects of physical activity in an HIV-infected woman with lipodystrophy: a case report. *J Med Case Rep* 2011;5:430. doi: 10.1186/1752-1947-5-430
23. Roubenoff R, Schmitz H, Bairos L, et al. Reduction of Abdominal Obesity in Lipodystrophy Associated with Human Immunodeficiency Virus Infection by Means of Diet and Exercise: Case Report and Proof of Principle. *Clinical Infectious Diseases* 2002;34(3):390-93. doi: 10.1086/338402
24. Oursler KK, Goulet JL, Crystal S, et al. Association of age and comorbidity with physical function in HIV-infected and uninfected patients: results from the Veterans Aging Cohort Study. *AIDS patient care and STDs* 2011;25(1):13-20. doi: 10.1089/apc.2010.0242
25. World Health Organization. Global recommendations on physical activity for health. Geneva, Switzerland: World Health Organization, 2011.
26. Center for Disease Control and Prevention. Act Against AIDS: Physical Activity Atlanta, The United States of America 2017 [Available from: <https://www.cdc.gov/actagainststids/campaigns/hivtreatmentworks/livewell/physical.html> accessed 13-11-2017.
27. Frantz JM, Murenzi A. The physical activity levels among people living with human immunodeficiency virus/acquired immunodeficiency syndrome receiving high active antiretroviral therapy in Rwanda. *SAHARA-J: Journal of Social Aspects of HIV/AIDS* 2013;10(3-4):113-18.
28. Trevisol F, Alencastro P, Ribeiro P, et al. Association of physical activity with lipodystrophy syndrome in HIV-infected patients. *J AIDS Clinic Res* 2012;3(8):1.
29. Monroe AK, Brown TT, Cox C, et al. Physical Activity and Its Association with Insulin Resistance in Multicenter AIDS Cohort Study Men. *AIDS Res Hum Retroviruses* 2015;31(12):1250-6. doi: 10.1089/aid.2015.0027
30. Fillipas S, Bowtell-Harris CA, Oldmeadow LB, et al. Physical activity uptake in patients with HIV: who does how much? *International journal of STD & AIDS* 2008;19(8):514-8. doi: 10.1258/ijsa.2007.007237 [published Online First: 2008/07/30]
31. Trang NH, Hong TK, HP VDP, et al. Longitudinal physical activity changes in adolescents: Ho Chi Minh City Youth Cohort. *Med Sci Sports Exerc* 2012;44(8):1481-9. doi: 10.1249/MSS.0b013e31824e50dc
32. Trang NH, Hong TK, Dibley MJ, et al. Factors associated with physical inactivity in adolescents in Ho Chi Minh City, Vietnam. *Med Sci Sports Exerc* 2009;41(7):1374-83. doi: 10.1249/MSS.0b013e31819c0dd3
33. Tran VD, Lee AH, Jancey J, et al. Community-based physical activity and nutrition programme for adults with metabolic syndrome in Vietnam: study protocol for a cluster-randomised controlled trial. *BMJ Open* 2016;6(6):e011532. doi: 10.1136/bmjopen-2016-011532
34. Nguyen TH, Tang HK, Kelly P, et al. Association between physical activity and metabolic syndrome: a cross sectional survey in adolescents in Ho Chi Minh City, Vietnam. *BMC Public Health* 2010;10:141. doi: 10.1186/1471-2458-10-141
35. Bui TV, Blizzard CL, Luong KN, et al. Physical Activity in Vietnam: Estimates and Measurement Issues. *PloS one* 2015;10(10):e0140941. doi: 10.1371/journal.pone.0140941
36. Rees S, Silove D, Chey T, et al. Physical activity and psychological distress amongst Vietnamese living in the Mekong Delta. *Aust N Z J Psychiatry* 2012;46(10):966-71. doi: 10.1177/0004867412459568
37. Minh HV, Byass P, Wall S. Mortality from cardiovascular diseases in Bavi District, Vietnam. *Scand J Public Health Suppl* 2003;62:26-31.

- 1
- 2
- 3 38. Bui TV, Blizzard CL, Luong KN, et al. National survey of risk factors for non-communicable disease
- 4 in Vietnam: prevalence estimates and an assessment of their validity. *BMC Public Health*
- 5 2016;16 doi: 10.1186/s12889-016-3160-4
- 6 39. Service UFA. Vietnam retails food sector report 2016. Hanoi, Vietnam: USDA Foreign Agriculture
- 7 Service, 2016.
- 8 40. UNAIDS. Antiretroviral therapy coverage (% of people living with HIV), 2017.
- 9 41. National Assembly. Constitution of the Socialist Republic of Vietnam: National Assembly, 2013.
- 10 42. Vietnam Ministry of Health. Decision No 3003/QD-BYT on issuing "Guideline for HIV diagnosis
- 11 and treatment". 2009
- 12 43. Centers for Disease Control and Prevention. 1993 Revised Classification System for HIV Infection
- 13 and Expanded Surveillance Case Definition for AIDS Among Adolescents and Adults, 1993.
- 14 44. Giordano TP, Guzman D, Clark R, et al. Measuring Adherence to Antiretroviral Therapy in a
- 15 Diverse Population Using a Visual Analogue Scale. *HIV Clinical Trials* 2004;5(2):74-79. doi:
- 16 10.1310/JFXH-G3X2-EYM6-D6UG
- 17 45. Tran BX, Nguyen LT, Nguyen NH, et al. Determinants of antiretroviral treatment adherence
- 18 among HIV/AIDS patients: a multisite study. *Global health action* 2013;6:19570. doi:
- 19 10.3402/gha.v6i0.19570 [published Online First: 2013/03/19]
- 20 46. Tran BX, Ohinmaa A, Nguyen LT. Quality of life profile and psychometric properties of the EQ-5D-
- 21 5L in HIV/AIDS patients. *Health and quality of life outcomes* 2012;10:132. doi: 10.1186/1477-
- 22 7525-10-132
- 23 47. Ternent L MP, Newlands D. Exploring biases in the double bounded dichotomous choice (DBDC)
- 24 and DBDC with open ended follow-up methods. 2010
- 25 48. Guidelines for Data Processing and Analysis of the International Physical Activity Questionnaire
- 26 (IPAQ) - Short Form. 2004
- 27 49. Grace JM, Semple SJ, Combrink S. Exercise therapy for human immunodeficiency virus/AIDS
- 28 patients: Guidelines for clinical exercise therapists. *Journal of Exercise Science & Fitness*
- 29 2015;13(1):49-56. doi: <http://dx.doi.org/10.1016/j.jesf.2014.10.003>
- 30 50. Takahashi T, Takeshima N, Rogers NL, et al. Passive and active exercises are similarly effective in
- 31 elderly nursing home residents. *J Phys Ther Sci* 2015;27(9):2895-900. doi:
- 32 10.1589/jpts.27.2895
- 33 51. Zimmerman LM, Barnason S, Schulz P, et al. Rural Versus Urban Comparison: Physical Activity
- 34 and Functioning Following Coronary Artery Bypass Surgery. *Online J Rural Nurs Health Care*
- 35 2012;12(1):16-28.
- 36 52. Yousefian A, Hennessy E, Umstattd MR, et al. Development of the Rural Active Living Assessment
- 37 Tools: measuring rural environments. *Preventive medicine* 2010;50 Suppl 1:S86-92. doi:
- 38 10.1016/j.ypmed.2009.08.018
- 39 53. Chrisman M, Nothwehr F, Yang G, et al. Environmental influences on physical activity in rural
- 40 Midwestern adults: a qualitative approach. *Health Promot Pract* 2015;16(1):142-8. doi:
- 41 10.1177/1524839914524958
- 42 54. Van Domelen DR, Koster A, Caserotti P, et al. Employment and physical activity in the U.S. *Am J*
- 43 *Prev Med* 2011;41(2):136-45. doi: 10.1016/j.amepre.2011.03.019
- 44 55. Clingerman E. Physical activity, social support, and health-related quality of life among persons
- 45 with HIV disease. *Journal of community health nursing* 2004;21(3):179-97. doi:
- 46 10.1207/s15327655jchn2103\_5 [published Online First: 2004/09/25]
- 47 56. Grayson JP. Health, physical activity level, and employment status in Canada. *Int J Health Serv*
- 48 1993;23(4):743-61. doi: 10.2190/W5NR-A7A4-BX4A-T4F7
- 49 57. Lagerros YT, Lagiou P. Assessment of physical activity and energy expenditure in epidemiological
- 50 research of chronic diseases. *Eur J Epidemiol* 2007;22(6):353-62. doi: 10.1007/s10654-007-
- 51 9154-x
- 52
- 53
- 54
- 55
- 56
- 57
- 58
- 59
- 60

- 1  
2  
3 58. Salmon J, Owen N, Bauman A, et al. Leisure-time, occupational, and household physical activity  
4 among professional, skilled, and less-skilled workers and homemakers. *Preventive medicine*  
5 2000;30(3):191-9. doi: 10.1006/pmed.1999.0619 [published Online First: 2000/02/24]
- 6 59. Tran BX, Ohinmaa A, Nguyen LT, et al. Gender differences in quality of life outcomes of HIV/AIDS  
7 treatment in the latent feminization of HIV epidemics in Vietnam. *AIDS care*  
8 2012;24(10):1187-96. doi: 10.1080/09540121.2012.658752
- 9 60. Tran BX, Hwang J, Nguyen LH, et al. Impact of Socioeconomic Inequality on Access, Adherence,  
10 and Outcomes of Antiretroviral Treatment Services for People Living with HIV/AIDS in  
11 Vietnam. *PLoS one* 2016;11(12):e0168687. doi: 10.1371/journal.pone.0168687
- 12 61. Hansana V, Sanchaisuriya P, Durham J, et al. Adherence to antiretroviral therapy (ART) among  
13 people living with HIV (PLHIV): a cross-sectional survey to measure in Lao PDR. *BMC Public*  
14 *Health* 2013;13:617. doi: 10.1186/1471-2458-13-617
- 15 62. Andreo C, Bouhnik AD, Soletti J, et al. [Non-compliance in HIV-infected patients, supported by a  
16 community association]. *Sante Publique* 2001;13(3):249-62.
- 17 63. Blashill AJ, Mayer KH, Crane H, et al. Physical activity and health outcomes among HIV-infected  
18 men who have sex with men: a longitudinal mediational analysis. *Ann Behav Med*  
19 2013;46(2):149-56. doi: 10.1007/s12160-013-9489-3
- 20 64. Tran BX, Nguyen LH, Ohinmaa A, et al. Longitudinal and cross sectional assessments of health  
21 utility in adults with HIV/AIDS: a systematic review and meta-analysis. *BMC Health Serv Res*  
22 2015;15:7. doi: 10.1186/s12913-014-0640-z
- 23 65. Nguyen LH, Nguyen LHT, Boggiano VL, et al. Quality of life and healthcare service utilization  
24 among methadone maintenance patients in a mountainous area of Northern Vietnam.  
25 *Health and quality of life outcomes* 2017;15(1):77. doi: 10.1186/s12955-017-0633-9
- 26 66. O'Brien KK, Tynan AM, Nixon SA, et al. Effectiveness of Progressive Resistive Exercise (PRE) in the  
27 context of HIV: systematic review and meta-analysis using the Cochrane Collaboration  
28 protocol. *BMC infectious diseases* 2017;17 doi: 10.1186/s12879-017-2342-8
- 29 67. O'Brien KK, Tynan AM, Nixon SA, et al. Effectiveness of aerobic exercise for adults living with HIV:  
30 systematic review and meta-analysis using the Cochrane Collaboration protocol. *BMC*  
31 *infectious diseases* 2016;16 doi: 10.1186/s12879-016-1478-2
- 32 68. Jerome GJ, Dalcin AT, Young DR, et al. Rationale, design and baseline data for the Activating  
33 Consumers to Exercise through Peer Support (ACE trial): A randomized controlled trial to  
34 increase fitness among adults with mental illness. *Ment Health Phys Act* 2012;5(2):166-74.  
35 doi: 10.1016/j.mhpa.2012.05.002
- 36 69. Harding R, Simms V, Penfold S, et al. Multi-centred mixed-methods PEPFAR HIV care & support  
37 public health evaluation: study protocol. *BMC Public Health* 2010;10:584. doi: 10.1186/1471-  
38 2458-10-584
- 39 70. . Consolidated Guidelines on the Use of Antiretroviral Drugs for Treating and Preventing HIV  
40 Infection: Recommendations for a Public Health Approach. 2nd ed. Geneva 2016.
- 41 71. Kalichman SC. Understanding AIDS: A guide for mental health professionals: American  
42 Psychological Association 1995.
- 43 72. . Peer Support for Diabetes, Heart Disease and HIV/AIDS: A Review of the Clinical Effectiveness,  
44 Cost-effectiveness, and Guidelines. Ottawa (ON) 2013.
- 45 73. Peterson JL, Rintamaki LS, Brashers DE, et al. The forms and functions of peer social support for  
46 people living with HIV. *J Assoc Nurses AIDS Care* 2012;23(4):294-305. doi:  
47 10.1016/j.jana.2011.08.014
- 48 74. Krebs DW, Chi BH, Mulenga Y, et al. Community-based follow-up for late patients enrolled in a  
49 district-wide programme for antiretroviral therapy in Lusaka, Zambia. *AIDS care*  
50 2008;20(3):311-7. doi: 10.1080/09540120701594776
- 51  
52  
53  
54  
55  
56  
57  
58  
59  
60

**Figure 1. Physical activity among antiretroviral therapy (ART) patients regarding ART duration.**

For peer review only

1  
2  
3  
4  
5  
6  
7  
8  
9  
10  
11  
12  
13  
14  
15  
16  
17  
18  
19  
20  
21  
22  
23  
24  
25  
26  
27  
28  
29  
30  
31  
32  
33  
34  
35  
36  
37  
38  
39  
40  
41  
42  
43  
44  
45  
46  
47  
48  
49  
50  
51  
52  
53  
54  
55  
56  
57  
58  
59  
60

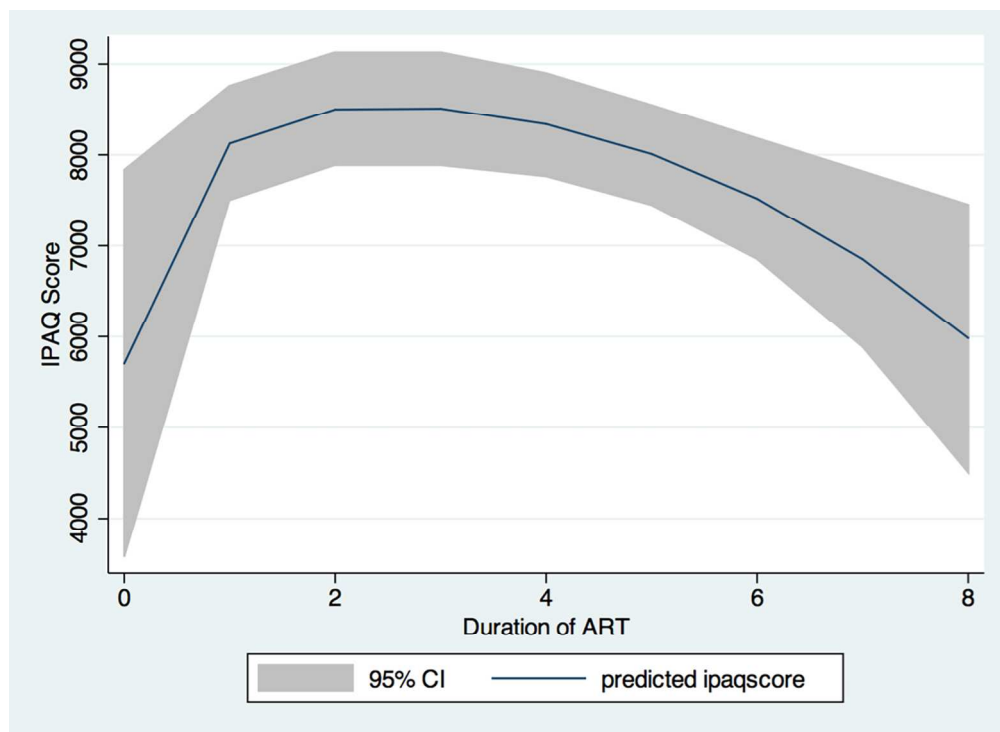

Figure 1. Physical activity among antiretroviral therapy (ART) patients regarding ART duration

137x99mm (300 x 300 DPI)



## STROBE Statement—checklist of items that should be included in reports of observational studies

|                              | Item No | Page                                                                                                         | Recommendation                                                                                                                                                                             |
|------------------------------|---------|--------------------------------------------------------------------------------------------------------------|--------------------------------------------------------------------------------------------------------------------------------------------------------------------------------------------|
| <b>Title and abstract</b>    | 1       | 1                                                                                                            | (a) Indicate the study's design with a commonly used term in the title or the abstract                                                                                                     |
|                              |         | 2                                                                                                            | (b) Provide in the abstract an informative and balanced summary of what was done and what was found                                                                                        |
| <b>Introduction</b>          |         |                                                                                                              |                                                                                                                                                                                            |
| Background/rationale         | 2       | 4,5                                                                                                          | Explain the scientific background and rationale for the investigation being reported                                                                                                       |
| Objectives                   | 3       | 5                                                                                                            | State specific objectives, including any prespecified hypotheses                                                                                                                           |
| <b>Methods</b>               |         |                                                                                                              |                                                                                                                                                                                            |
| Study design                 | 4       | 5                                                                                                            | Present key elements of study design early in the paper                                                                                                                                    |
| Setting                      | 5       | 5                                                                                                            | Describe the setting, locations, and relevant dates, including periods of recruitment, exposure, follow-up, and data collection                                                            |
| Participants                 | 6       | 5                                                                                                            | (a) <i>Cohort study</i> —Give the eligibility criteria, and the sources and methods of selection of participants. Describe methods of follow-up                                            |
|                              |         |                                                                                                              | <i>Case-control study</i> —Give the eligibility criteria, and the sources and methods of case ascertainment and control selection. Give the rationale for the choice of cases and controls |
|                              |         |                                                                                                              | <i>Cross-sectional study</i> —Give the eligibility criteria, and the sources and methods of selection of participants                                                                      |
| Variables                    | 7       | 6,7                                                                                                          | (b) <i>Cohort study</i> —For matched studies, give matching criteria and number of exposed and unexposed                                                                                   |
|                              |         |                                                                                                              | <i>Case-control study</i> —For matched studies, give matching criteria and the number of controls per case                                                                                 |
|                              |         |                                                                                                              | Clearly define all outcomes, exposures, predictors, potential confounders, and effect modifiers. Give diagnostic criteria, if applicable                                                   |
| Data sources/<br>measurement | 8*      | 6,7                                                                                                          | For each variable of interest, give sources of data and details of methods of assessment (measurement). Describe comparability of assessment methods if there is more than one group       |
| Bias                         | 9       | 7                                                                                                            | Describe any efforts to address potential sources of bias                                                                                                                                  |
| Study size                   | 10      | 6                                                                                                            | Explain how the study size was arrived at                                                                                                                                                  |
| Quantitative variables       | 11      | 6,7                                                                                                          | Explain how quantitative variables were handled in the analyses. If applicable, describe which groupings were chosen and why                                                               |
| Statistical methods          | 2       | 7                                                                                                            | (a) Describe all statistical methods, including those used to control for confounding                                                                                                      |
|                              |         | 7                                                                                                            | (b) Describe any methods used to examine subgroups and interactions                                                                                                                        |
|                              |         | 7                                                                                                            | (c) Explain how missing data were addressed                                                                                                                                                |
|                              |         |                                                                                                              | (d) <i>Cohort study</i> —If applicable, explain how loss to follow-up was addressed                                                                                                        |
|                              |         |                                                                                                              | <i>Case-control study</i> —If applicable, explain how matching of cases and controls was addressed                                                                                         |
|                              |         | <i>Cross-sectional study</i> —If applicable, describe analytical methods taking account of sampling strategy |                                                                                                                                                                                            |
|                              |         | (e) Describe any sensitivity analyses                                                                        |                                                                                                                                                                                            |

|                          | Item No | Page       | Recommendation                                                                                                                                                                                                                                                                                                                                                                                                |
|--------------------------|---------|------------|---------------------------------------------------------------------------------------------------------------------------------------------------------------------------------------------------------------------------------------------------------------------------------------------------------------------------------------------------------------------------------------------------------------|
| <b>Results</b>           |         |            |                                                                                                                                                                                                                                                                                                                                                                                                               |
| Participants             | 13*     | 8          | (a) Report numbers of individuals at each stage of study—eg numbers potentially eligible, examined for eligibility, confirmed eligible, included in the study, completing follow-up, and analysed<br>(b) Give reasons for non-participation at each stage<br>(c) Consider use of a flow diagram                                                                                                               |
| Descriptive data         | 14*     | 8-11       | (a) Give characteristics of study participants (eg demographic, clinical, social) and information on exposures and potential confounders                                                                                                                                                                                                                                                                      |
|                          |         | 7          | (b) Indicate number of participants with missing data for each variable of interest                                                                                                                                                                                                                                                                                                                           |
|                          |         |            | (c) <i>Cohort study</i> —Summarise follow-up time (eg, average and total amount)                                                                                                                                                                                                                                                                                                                              |
| Outcome data             | 15*     |            | <i>Cohort study</i> —Report numbers of outcome events or summary measures over time                                                                                                                                                                                                                                                                                                                           |
|                          |         |            | <i>Case-control study</i> —Report numbers in each exposure category, or summary measures of exposure                                                                                                                                                                                                                                                                                                          |
|                          |         | 7          | <i>Cross-sectional study</i> —Report numbers of outcome events or summary measures                                                                                                                                                                                                                                                                                                                            |
| Main results             | 16      | 7, 8,9,10  | (a) Give unadjusted estimates and, if applicable, confounder-adjusted estimates and their precision (eg, 95% confidence interval). Make clear which confounders were adjusted for and why they were included<br>(b) Report category boundaries when continuous variables were categorized<br>(c) If relevant, consider translating estimates of relative risk into absolute risk for a meaningful time period |
|                          |         |            |                                                                                                                                                                                                                                                                                                                                                                                                               |
|                          |         |            |                                                                                                                                                                                                                                                                                                                                                                                                               |
| Other analyses           | 17      |            | Report other analyses done—eg analyses of subgroups and interactions, and sensitivity analyses                                                                                                                                                                                                                                                                                                                |
| <b>Discussion</b>        |         |            |                                                                                                                                                                                                                                                                                                                                                                                                               |
| Key results              | 18      | 9          | Summarise key results with reference to study objectives                                                                                                                                                                                                                                                                                                                                                      |
| Limitations              | 19      | 14         | Discuss limitations of the study, taking into account sources of potential bias or imprecision. Discuss both direction and magnitude of any potential bias                                                                                                                                                                                                                                                    |
| Interpretation           | 20      | 12, 13, 14 | Give a cautious overall interpretation of results considering objectives, limitations, multiplicity of analyses, results from similar studies, and other relevant evidence                                                                                                                                                                                                                                    |
| Generalisability         | 21      | 14         | Discuss the generalisability (external validity) of the study results                                                                                                                                                                                                                                                                                                                                         |
| <b>Other information</b> |         |            |                                                                                                                                                                                                                                                                                                                                                                                                               |
| Funding                  | 22      | none       | Give the source of funding and the role of the funders for the present study and, if applicable, for the original study on which the present article is based                                                                                                                                                                                                                                                 |

\*Give information separately for cases and controls in case-control studies and, if applicable, for exposed and unexposed groups in cohort and cross-sectional studies.

1  
2  
3  
4  
5  
6  
7  
8  
9  
10  
11  
12  
13  
14  
15  
16  
17  
18  
19  
20  
21  
22  
23  
24  
25  
26  
27  
28  
29  
30  
31  
32  
33  
34  
35  
36  
37  
38  
39  
40  
41  
42  
43  
44  
45  
46  
47  
48  
49  
50  
51  
52  
53  
54  
55  
56  
57  
58  
59  
60

**Note:** An Explanation and Elaboration article discusses each checklist item and gives methodological background and published examples of transparent reporting. The STROBE checklist is best used in conjunction with this article (freely available on the Web sites of PLoS Medicine at <http://www.plosmedicine.org/>, Annals of Internal Medicine at <http://www.annals.org/>, and Epidemiology at <http://www.epidem.com/>). Information on the STROBE Initiative is available at [www.strobe-statement.org](http://www.strobe-statement.org).

For peer review only

# BMJ Open

## Physical activity among HIV-positive patients receiving antiretroviral therapy in Hanoi and Nam Dinh, Vietnam : A cross - sectional study

|                                 |                                                                                                                                                                                                                                                                                                                                                                                                                                                                                                                                                                                                                                                                                                                   |
|---------------------------------|-------------------------------------------------------------------------------------------------------------------------------------------------------------------------------------------------------------------------------------------------------------------------------------------------------------------------------------------------------------------------------------------------------------------------------------------------------------------------------------------------------------------------------------------------------------------------------------------------------------------------------------------------------------------------------------------------------------------|
| Journal:                        | <i>BMJ Open</i>                                                                                                                                                                                                                                                                                                                                                                                                                                                                                                                                                                                                                                                                                                   |
| Manuscript ID                   | bmjopen-2017-020688.R2                                                                                                                                                                                                                                                                                                                                                                                                                                                                                                                                                                                                                                                                                            |
| Article Type:                   | Research                                                                                                                                                                                                                                                                                                                                                                                                                                                                                                                                                                                                                                                                                                          |
| Date Submitted by the Author:   | 22-Mar-2018                                                                                                                                                                                                                                                                                                                                                                                                                                                                                                                                                                                                                                                                                                       |
| Complete List of Authors:       | Dang, Anh; Institute for Preventive Medicine and Public Health, Hanoi Medical University<br>Nguyen, Long; School of Medicine and Pharmacy, Vietnam National University<br>Nguyen, Anh; Johns Hopkins University, School of Medicine<br>Xuan Bach, Tran; Institute for Preventive Medicine and Public Health, Hanoi Medical University, Health Economics<br>Tran, Tung; Dai Hoc Duy Tan,<br>Latkin, Carl; Johns Hopkins School of Public Health, Health, Behavior, and Society<br>Zhang, Melvyn ; Biomedical Global Institute of Healthcare Research & Technology (BIGHEART), National University of Singapore<br>Ho, Roger; National University Singapore Yong Loo Lin School of Medicine, Psychological Medicine |
| <b>Primary Subject Heading</b>: | HIV/AIDS                                                                                                                                                                                                                                                                                                                                                                                                                                                                                                                                                                                                                                                                                                          |
| Secondary Subject Heading:      | HIV/AIDS, Public health                                                                                                                                                                                                                                                                                                                                                                                                                                                                                                                                                                                                                                                                                           |
| Keywords:                       | physical activity, antiretroviral therapy, hiv/aids, Vietnam, PLWH                                                                                                                                                                                                                                                                                                                                                                                                                                                                                                                                                                                                                                                |
|                                 |                                                                                                                                                                                                                                                                                                                                                                                                                                                                                                                                                                                                                                                                                                                   |

SCHOLARONE™  
Manuscripts

1  
2  
3 **Physical activity among HIV-positive patients receiving**  
4 **antiretroviral therapy in Hanoi and Nam Dinh, Vietnam : A cross –**  
5 **sectional study**  
6  
7  
8  
9

10 Anh Kim Dang<sup>1</sup>, Long Hoang Nguyen<sup>2</sup>, Anh Quynh Nguyen<sup>3</sup>, Bach Xuan Tran<sup>1,4</sup>,  
11 Tung Thanh Tran<sup>5</sup>, Carl A. Latkin<sup>4</sup>, Melvyn WB Zhang<sup>6</sup>, Roger CM Ho<sup>7</sup>  
12

13 <sup>1</sup> Institute for Preventive Medicine and Public Health, Hanoi Medical University,  
14 Hanoi, Vietnam  
15

16 <sup>2</sup> School of Medicine and Pharmacy, Vietnam National University, Hanoi, Vietnam  
17

18 <sup>3</sup> School of Medicine, Johns Hopkins University, Baltimore, MD, USA  
19

20 <sup>4</sup> Bloomberg School of Public Health, Johns Hopkins University, Baltimore, MD, USA  
21

22 <sup>5</sup> Institute for Global Health Innovations, Duy Tan University, Da Nang, Vietnam  
23

24 <sup>6</sup> Biomedical Global Institute of Healthcare Research & Technology (BIGHEART),  
25 National University of Singapore, Singapore  
26

27 <sup>7</sup> Department of Psychological Medicine, Yong Loo Lin School of Medicine, National  
28 University of Singapore, Singapore  
29  
30  
31  
32  
33  
34  
35  
36  
37  
38  
39

40 Corresponding author:  
41 Anh Kim Dang,  
42 Institute for Preventive Medicine and Public Health,  
43 Hanoi Medical University, Hanoi, Vietnam, 100000  
44 Email: kimanh.yhdp@gmail.com  
45  
46  
47  
48  
49  
50  
51  
52  
53  
54  
55  
56  
57  
58  
59  
60

## Abstract

**Objectives:** Antiretroviral therapy (ART) has facilitated the transition of HIV infection into a chronic disease, where adherence to medications is required along with keeping a healthy lifestyle. Therefore, an increase in physical activity has been recommended for HIV patients in order to maintain their health status. This study looked to determine the physical activity level and its associated factors among HIV patients receiving ART treatment.

**Settings:** 8 outpatient clinic sites across different levels of the health systems in both rural and urban settings in Hanoi and Nam Dinh, Vietnam.

**Study design and participants:** A cross-sectional study was performed among 1,133 HIV patients receiving ART treatment from January to August 2013.

**Primary and secondary outcome measures:** Physical activity level was measured using the International Physical Activity Questionnaire (IPAQ). Socio-economic, health-related quality of life, ART adherence, ART-related characteristics were self-reported.

**Result:** 16% of participants were inactive, and 68% were reported active via health-enhancing physical activity (HEPA). Rural participants reported a higher level of physical activity compared to urban participants. Participants having longer duration of ART were less likely to be physically active. Participants who were female and self-employed, who had higher CD4 cell count, higher EQ-5D-5L index/EQ-VAS, and shared their health status with their peers were more likely to have a higher IPAQ score or be physically active. A lower IPAQ-score was associated with participants living in urban areas and being at the symptomatic stage. Participants having poor adherence and higher duration of ART were more likely to be physically inactive.

**Conclusion:** The majority of participants who received ART were physically active. There is a need for interventions to promote physical activity among HIV patients in urban areas and in the later ART treatment phases. Other potential interventions to increase the level of physical activity include peer support and job guidance.

**Keywords:** Physical activity, antiretroviral therapy, HIV/AIDS, Vietnam, PLWH

### Strengths and limitations

- This study included a large sample size of HIV-positive patients who received antiretroviral therapy treatment (ART) across different levels of the health systems in both rural and urban areas of Vietnam.
- The study employed a number of validated international instruments to ensure the comparability between our results and other studies elsewhere.
- The IPAQ was a subjectively self-reported measure that may under- or over-estimate the actual physical activity of PLWH.
- A convenience sampling technique was used and this may limit the generalizability of the findings as well as an accurate representative of HIV/AIDS population.
- The causal inference between the level of physical activity and the number of CD4 cells, and the level of physical activity and the quality of life could not be established due to the study's cross-sectional design.

## Introduction

The implementation of highly active antiretroviral therapy (HAART) has led to significant milestones in the reduction of HIV/AIDS-related morbidity and mortality. According to a UNAIDS report in 2016, among 36.7 million people living with HIV (PLWH), an estimated 19.5 million patients had access to life-saving antiretroviral medicines and the global coverage of ART has reached 53%<sup>1</sup>. PLWH who take a potent combination of antiretroviral (ARV) drug regimen enjoy longer and healthier lives<sup>1</sup>. This improvement has also transformed HIV/AIDS into a chronic disease<sup>2</sup>. However, one of the most common adverse health effects of ART among PLWH is lipodystrophy syndrome<sup>3</sup> including morphologic (peripheral lipoatrophy and central fat accumulation) and metabolic (hyper-triglyceridaemia, hyper-cholesterolaemia, insulin resistance, type 2 diabetes, lactic acidaemia) symptoms<sup>4 5</sup>. This contributes to an increase in risks of cardiovascular and other non-communicable diseases as a result of changes in adipose tissue distribution and metabolism<sup>6 7</sup>. These side-effects were also found to be the main reasons for the patient's non-adherence to antiretroviral medication and discontinuing the therapy<sup>8 9</sup>.

Since ART is requisite for viral suppression and recovering of the immune system, it is important for health providers to identify and patients to adopt strategies to prevent these adverse effects and achieve optimization of the treatment<sup>10 11</sup>. Physical activity was recommended as an alternative and non-pharmacological treatment intervention to improve the patient's health status<sup>12</sup>. Physical activity is defined as the movement of the body that works the skeletal muscles and expends more energy than the resting state<sup>13</sup>. There several subgroups of physical activities such as occupational activities, conditioning exercises, sports, household tasks (for example cradling baby, cleaning) and other activities. There are also different levels of intensity, which include light, moderate or heavy<sup>13</sup>. Physical activity has been shown to be able to increase the functional capacity, muscle strength, joint flexibility, endurance and energy among people living with HIV<sup>14 15</sup>. Engaging in physical activity has been found to reduce incidences of certain chronic diseases such as cardiovascular by lowering blood pressure in hypertensive patients and improving lipid-lipoprotein profiles<sup>16-18</sup>, or improving glucose homeostasis<sup>19</sup> in people with diabetes; and breast cancer<sup>20 21</sup>. Physical activity can also reverse the metabolic and body composition change of the patient by lowering visceral and subcutaneous fat in the center of the body and increasing the diameter of the peripheral parts, therefore prevent lipodystrophy<sup>22 23</sup>.

Thus, engaging in physical activities is a very important health-related behavior for PLWH, because they are found to be less likely to do physical activity compared to uninfected patients<sup>24</sup>. A typical physical activity guideline for normal adults recommends a minimum of 150 minutes of moderate-intensity physical activity or 75 minutes of vigorous-intensity physical activity each week or an equivalent combination of moderate- and vigorous-intensity activities<sup>25</sup>. The Center for Disease Control and Prevention (CDC) suggests that a PLWH should comply at least one type of physical activity in this guideline to keep healthy<sup>26</sup>. However, in many developing countries, the rates of physical inactivity have been shown to be more than 50% among PLWH<sup>27 28</sup> in comparison to about one fourth in the United States and Australia<sup>29 30</sup>. The difference depends on various factors such as gender, age groups, occupations, level of CD4 cell count and quality of life<sup>27 28 30</sup>.



1  
2  
3  
4 In Vietnam, most previous studies have focused on the physical activity levels  
5 among Vietnamese adolescents<sup>31 32</sup> and adults with chronic diseases and metabolic  
6 syndromes<sup>33 34</sup>. A previous study by Tan Bui et al (2015) found that 70% of the  
7 population met the WHO recommendations for physical activity level for 18 to 64-  
8 year-old adults<sup>35</sup>. Additionally, the socioeconomic and geographical differences  
9 were considered as factors that shape attitude and behavior toward physical activity.  
10 Prior studies also revealed that physical activity level was greater in male compared  
11 to female<sup>35</sup> and among people who had lower educational attainment<sup>36</sup>.  
12 Furthermore, the level of physical activity in rural areas was significantly higher than  
13 those in urban settings perhaps due to more access to modern transportation  
14 systems and sedentary behaviors in the urban setting<sup>35 37</sup>. A national representative  
15 survey of more than 14,700 participants in 2010 indicated that provinces with higher  
16 urban population proportions had a lesser proportion of active people<sup>38</sup>.  
17 Nonetheless, the rate of urbanization in Vietnam has been quickly on the rise in  
18 recent years, from 21% in 2008 to 32% in 2013 and is projected to reach 45% in  
19 2020<sup>39</sup>. These changes raise the need for understanding the potential variability of  
20 the prevalence of physical activity or inactivity between rural and urban settings,  
21 especially among people with chronic illnesses such as HIV/AIDS and other non-  
22 communicable diseases.  
23  
24

25  
26 Currently, Vietnam is still in a concentrated HIV epidemic stage and the proportion of  
27 ART coverage is estimated approximately at 42% of the country's PLWH's  
28 population in 2015<sup>40</sup>. Half of this number has been undergoing ART for a long time.  
29 Engaging in physical activity to reduce the risk of chronic diseases and enhance the  
30 effectiveness of the ART treatment is a potential intervention strategy to be  
31 considered by healthcare providers. However, little attention has been paid to  
32 determining the degree of physical activity as an intervention that could enhance the  
33 level of physical activity among individuals with HIV infection in Vietnam, particularly  
34 between urban and rural areas. According to the Vietnamese Constitution in 2013,  
35 an urban area is defined as a settlement with a high population density and built  
36 environment, whereas a rural area refers to a place that has a low population density  
37 and is located outside the urban setting, where people mostly work in the agriculture  
38 sector<sup>41</sup>. Based on this definition, we hypothesized that PLWH in an urban area  
39 would have a lower level of physical activity compared to their counterparts in the  
40 rural area. This study looked to assess the level of physical activity across different  
41 settings and examine the factors associated with the level of physical activity among  
42 HIV patients receiving ART treatment across different levels of the health systems  
43 and in both rural and urban settings.  
44  
45

## 46 **Methods**

### 47 **Study setting and subjects**

48 A cross-sectional study was performed from January to August 2013 in Hanoi and  
49 Nam Dinh, two Vietnamese epicenters providing HIV/AIDS surveillance and  
50 treatment services in the Northern region of Vietnam. The study was performed at 8  
51 outpatient clinics: 5 in Hanoi and 3 in Nam Dinh. The locations included: one national  
52 hospital (Bach Mai Hospital), one provincial hospital (Nam Dinh provincial hospital),  
53 one provincial center (Nam Dinh Provincial AIDS Control Centre) and five district  
54 health centers (Hoang Mai, Long Bien, Dong Anh, Ha Dong, Xuan Truong). The  
55 eligibility criteria for selecting outpatient clinic sites in Hanoi and Nam Dinh included:  
56  
57  
58  
59  
60

1  
2  
3 1) being representative of the public health system in Vietnam which contains  
4 central-; provincial- and district- levels); 2) being able to afford ART service  
5 implemented following the official guidelines of the Vietnamese Ministry of Health <sup>42</sup>.  
6

7 Participants were recruited using convenience sampling technique if they met the  
8 following eligibility criteria: 1) being 18 years old or above; 2) receiving ART  
9 treatment from those clinics mentioned above; 3) having a confirmatory testing of  
10 HIV-positive; 4) agreeing to participate in the study; 5) being able to communicate  
11 with the data collector. The exclusion criteria included those who suffered from  
12 serious illness during the recruitment process. We approached participants when  
13 they visited clinics for medication or to receive counseling. We identified eligible  
14 participants for the study based on the health staff's feedbacks. These participants  
15 were invited into a small counseling room by well-trained health workers. They were  
16 introduced to the purpose of the study, the benefits and drawbacks of participating,  
17 and were then asked to join the study. If they agreed, participants would sign a  
18 written informed consent. We ensured the participants of the confidentiality of their  
19 participation in the study. The consenting process took place in a comfortable room  
20 with restricted access, which allowed for participants to have some privacy as they  
21 decide whether or not to join the project.  
22  
23

#### 24 **Measures and instruments**

25 Participants were invited to participate in 20-minute face-to-face interviews. Data  
26 were ascertained through interview-administered questionnaires conducted by data  
27 collectors who were medical students at Hanoi Medical University and experts in  
28 HIV-related fields. We did not involve health staff in collecting data to avoid social  
29 desirability bias. We developed a structured questionnaire with the following  
30 information:  
31  
32

##### 33 *Socioeconomic characteristics*

34 We asked participants to report their socioeconomic information which included  
35 gender (male/female), education attainment (illiterate/ elementary/ secondary/ high  
36 school/ vocational training/ university), age, marital status (single/ live with spouse/  
37 live with partner/ divorced/ widow), religion (cult of ancestors/ Buddhism/ Catholic/  
38 Protestant), and employment status (Unemployed/ Self-employed/ White-collar/  
39 Blue-collar or farmer/ Others).  
40  
41

##### 42 *ART-related characteristics*

43 We asked each participant for a self-report of their latest CD4 cell count, HIV stages  
44 (any asymptomatic/ symptomatic condition defined as "HIV-infected patients having  
45 clinical symptoms but not including AIDS-Indicator Conditions that meet at least one  
46 of the eligible criteria/ AIDS-Indicator Conditions") <sup>43</sup> and ART treatment duration.  
47 Data on viral load were not collected due to their unavailability at the time of the  
48 study. Non-adherence to ART was measured by self-report items. First, ART  
49 adherence of the last month was determined by a visual analog scale (VAS) where  
50 0-point showed completely non-adherence and 100-point showed completely  
51 adherence <sup>44</sup>. Participants were asked whether they forget to take ART medicine in  
52 the last four days. This approach has been applied successfully in a previous study  
53 <sup>45</sup>. We also asked the participants about whether they received peer support during  
54 ART treatment (Yes/No), and whether they shared their health status with their peers  
55 or not (Yes/No).  
56  
57  
58  
59

### Health-related quality of life

HRQOL was measured using the EQ-5D-5L instrument in the Vietnamese version, which was validated elsewhere<sup>46</sup>. This tool measures five dimensions of health-related quality of life including mobility, self-care, usual activities, pain/discomfort and anxiety/ depression with five response levels: no problems, slight problems, moderate problems, severe problems, and extreme problems. The combination of responses gives 3125 position health statuses with an aggregate single index weighting<sup>46</sup>. The Cronbach's alpha of this instrument was 0.85 with a good convergent validity<sup>46</sup>. Furthermore, we also used the EQ-VAS (visual analogue scale) which measures the self-rated health on a 20-cm vertical scale, with the endpoint ranges from 0 to 100 point, labeled "the worst health you can imagine" and "the best health you can imagine"<sup>47</sup>.

### Physical activity

To assess the level of physical activity of the participants, we used the International Physical Activity Questionnaire (IPAQ). The IPAQ was developed to use in adults aged 15-69 years old<sup>48</sup>. Several questions were used to assess three specific types of activity: vigorous activity, moderate activity, and walking activity. Example for each type of activity in our research context are listed below:

- Vigorous activity: Heavy lifting, hoeing, weight lifting, fast paced cycling, etc.
- Moderate activity: Playing badminton, slow paced cycling, cradling baby, selling, etc.
- Walking activity: Going to work, going to school, going elsewhere, going jogging, etc.

Each activity was scored separately by frequency (measured by days per week) and by duration (measured by times per day). The volume of each activity was also measured by its energy requirement determined in METs (METs are multiple of the resting metabolic rate)<sup>48</sup>.

The total IPAQ score was used as a continuous variable which was calculated by adding the MET minute per week of the three types of activity. We also evaluated the IPAQ score as a categorical variable which divided the physical activity into 3 levels: Inactive, minimally active and HEPA active.

Participants were categorized into (1) HEPA (health enhancing physical activity) active group if they did:

- vigorous activity for at least 3 days and obtained a total physical activity of at least 1500 MET-minutes/week;
- OR 7 or more days of combination physical activities of walking, moderate-intensity or vigorous activities and obtained a total physical activity of at least 3000 MET-minutes/week.

Participants were in the (2) Minimally active group if they had:

- 3 or more days of vigorous activity of at least 20 minutes per day (800 MET-minutes/week)
- OR 5 or more days of moderate activity or walking of at least 30 minutes per day

- 1  
2  
3 - OR 5 or more days of walking combining with moderate-intensity or vigorous  
4 intensity activities obtaining at least 600 MET-min/week.  
5

6 Participants were (3) Inactive or were determined as insufficiently active<sup>48</sup> if the  
7 individual did not meet the requirements for Categories 2 or 3.  
8

### 9 **Statistical analysis**

10 Data were analyzed by STATA version 12 (Stata Corp. LP, College Station, United  
11 States of America). A Chi-square test and a Mann Whitney test was used for  
12 analyzing demographic characteristics of participants as well as HRQOL, ART  
13 status, and sexual behaviors. Multivariate linear regression was employed to identify  
14 factors associated with IPAQ score. Because the IPAQ score had a non-normal  
15 distribution, we performed log-transformation for this variable in order to meet the  
16 requirement of the regression model. We also applied multivariate logistic regression  
17 to identify factors associated with whether the participants were active in physical  
18 activity or not. We applied a forward stepwise selection strategy to remove non-  
19 significant factors, the p-value of log-likelihood ratio test was set as less than 0.1 and  
20 this was the threshold to include a variable. A p-value <0.05 was considered as  
21 statistical significance.  
22  
23

### 24 **Ethics approval**

25 The study protocol was reviewed and granted ethics approval by the Vietnam  
26 Authority of HIV/AIDS Control's Scientific Research Committee. Participants  
27 confidently participated in the study and signed a written informed consent after  
28 received clear information on the benefits and drawbacks of the study. The consent  
29 process took place in a room with restricted access. Participants can withdraw from  
30 the interview at any time and this did not affect their current treatment.  
31  
32

### 33 **Patient and Public Involvement**

34 We conducted a pilot survey of fifty participants of different ages, genders, and  
35 occupations and only minor changes to the wording were made in order to meet  
36 patient's preferences and culture. After revision, we performed data collection using  
37 a structured questionnaire. Participants were not taken part in the recruitment as well  
38 as the conduct of the study. We aim to show our study results at national and  
39 international scientific meetings as well as publish our study in open-access journals.  
40 Therefore, our study is widely available to be disseminated to study participants and  
41 other interested international researchers  
42  
43

### 44 **Results**

45 A total of 1200 patients were invited to participate into the study, and 1133 patients  
46 agreed to enroll. The reasons for refusal included insufficient health, discomfort or  
47 having busy work schedules.  
48

49 The demographic and socioeconomic characteristics of participants living in rural  
50 and urban are given in **Table 1**. Out of 1,133 ART patients, approximately 60% was  
51 male. The majority had secondary and high school education (36.9% and 32%  
52 respectively); participants in urban areas had higher education than people in rural  
53 area (p=0.04). The marital status and employment were also significant different  
54 between rural and urban group (p<0.01). There was no difference of age group  
55 between rural and urban participants.  
56  
57  
58  
59

**Table 1: Socio-economic characteristic of PLWH in the study (n=1133)**

|                              | Rural       |           | Urban       |           | Total       |           | p-value            |
|------------------------------|-------------|-----------|-------------|-----------|-------------|-----------|--------------------|
|                              | n           | %         | n           | %         | n           | %         |                    |
| <b>Gender</b>                |             |           |             |           |             |           |                    |
| Male                         | 145         | 56.2      | 520         | 59.4      | 665         | 58.7      | 0.36 <sup>†</sup>  |
| Female                       | 113         | 43.8      | 355         | 40.6      | 468         | 41.3      |                    |
| <b>Education</b>             |             |           |             |           |             |           |                    |
| Illiterate                   | 5           | 1.9       | 7           | 0.8       | 12          | 1.1       | 0.04 <sup>†</sup>  |
| Elementary school            | 48          | 18.6      | 172         | 19.7      | 220         | 19.4      |                    |
| Secondary school             | 109         | 42.3      | 309         | 35.3      | 418         | 36.9      |                    |
| High school                  | 80          | 31        | 282         | 32.2      | 362         | 32        |                    |
| Vocational training          | 6           | 2.3       | 48          | 5.5       | 54          | 4.8       |                    |
| University                   | 10          | 3.9       | 57          | 6.5       | 67          | 5.9       |                    |
| <b>Marital status</b>        |             |           |             |           |             |           |                    |
| Single                       | 26          | 10.1      | 143         | 16.3      | 169         | 14.9      | 0.01 <sup>†</sup>  |
| Live with spouse             | 178         | 69        | 507         | 57.9      | 685         | 60.5      |                    |
| Live with partner            | 0           | 0         | 8           | 0.9       | 8           | 0.7       |                    |
| Divorced                     | 22          | 8.5       | 66          | 7.5       | 88          | 7.8       |                    |
| Widow                        | 32          | 12.4      | 151         | 17.3      | 183         | 16.2      |                    |
| <b>Religion</b>              |             |           |             |           |             |           |                    |
| Cult of ancestors            | 222         | 86.1      | 779         | 89        | 1,001       | 88.4      | 0.03 <sup>†</sup>  |
| Buddhism                     | 12          | 4.7       | 43          | 4.9       | 55          | 4.9       |                    |
| Catholic                     | 24          | 9.3       | 44          | 5         | 68          | 6         |                    |
| Protestant                   | 0           | 0         | 9           | 1         | 9           | 0.8       |                    |
| <b>Employment</b>            |             |           |             |           |             |           |                    |
| Unemployed                   | 47          | 18.2      | 184         | 21        | 231         | 20.4      | <0.01 <sup>†</sup> |
| Self-employed                | 98          | 38        | 371         | 42.4      | 469         | 41.4      |                    |
| White-collar worker          | 13          | 5         | 67          | 7.7       | 80          | 7.1       |                    |
| Blue-collar worker or farmer | 94          | 36.4      | 188         | 21.5      | 282         | 24.9      |                    |
| Others                       | 6           | 2.3       | 65          | 7.4       | 71          | 6.3       |                    |
|                              | <b>Mean</b> | <b>SD</b> | <b>Mean</b> | <b>SD</b> | <b>Mean</b> | <b>SD</b> |                    |
| <b>Age</b>                   | 35.6        | 6.6       | 35.5        | 7.0       | 35.5        | 6.9       | 0.6 <sup>††</sup>  |

Significance level was  $p < 0.05$

<sup>†</sup>Chi-square test

<sup>††</sup>Mann Whitney test

### Antiretroviral therapy (ART) status

About half of the participants were asymptomatic and the percentage of the rural participants who were unaware of their stage of HIV infection was significantly higher than the urban participants (52.1% vs 24.7%) (Table 2). The mean number of CD4 measurements and duration of ART treatment were 294.7 cells/ $\mu$ L (SD=215.2) and 3.5 years (SD=2.2) respectively. About 50% of the participants shared health status with their peers and only one-third received peer support.

**Table 2: Antiretroviral therapy status of participants (n=1133)**

|                   | Rural |      | Urban |    | Total |      | p-value            |
|-------------------|-------|------|-------|----|-------|------|--------------------|
|                   | n     | %    | n     | %  | n     | %    |                    |
| <b>HIV period</b> |       |      |       |    |       |      |                    |
| Asymptomatic      | 67    | 28.4 | 389   | 46 | 456   | 42.1 | <0.01 <sup>†</sup> |

|                                                       | Rural       |           | Urban       |           | Total       |           | p-value            |
|-------------------------------------------------------|-------------|-----------|-------------|-----------|-------------|-----------|--------------------|
|                                                       | n           | %         | n           | %         | n           | %         |                    |
| Symptomatic                                           | 32          | 13.6      | 161         | 19        | 193         | 17.8      |                    |
| AIDS                                                  | 14          | 5.9       | 87          | 10.3      | 101         | 9.3       |                    |
| Unknown                                               | 123         | 52.1      | 209         | 24.7      | 332         | 30.7      |                    |
| <b>ART duration (year)</b>                            |             |           |             |           |             |           |                    |
| 1 year                                                | 47          | 19.0      | 213         | 26.9      | 260         | 25.0      | <0.01 <sup>†</sup> |
| 2 – 4 years                                           | 91          | 36.9      | 354         | 44.7      | 445         | 42.8      |                    |
| More than 4 years                                     | 109         | 44.1      | 225         | 28.4      | 334         | 32.2      |                    |
| <b>Share health status with peers</b>                 |             |           |             |           |             |           |                    |
| Yes                                                   | 110         | 43.3      | 446         | 52.7      | 556         | 50.6      | 0.01 <sup>†</sup>  |
| No                                                    | 144         | 56.7      | 400         | 47.3      | 544         | 49.5      |                    |
| <b>Receiving peer support</b>                         |             |           |             |           |             |           |                    |
| Yes                                                   | 77          | 29.8      | 314         | 35.9      | 391         | 34.5      | 0.07 <sup>†</sup>  |
| No                                                    | 181         | 70.2      | 561         | 64.1      | 742         | 65.5      |                    |
| <b>Forgetting to take medicine in the last 4 days</b> |             |           |             |           |             |           |                    |
| No                                                    | 243         | 98        | 780         | 97.7      | 1,023       | 97.8      | 0.82 <sup>†</sup>  |
| Yes                                                   | 5           | 2         | 18          | 2.3       | 23          | 2.2       |                    |
|                                                       | <b>Mean</b> | <b>SD</b> | <b>Mean</b> | <b>SD</b> | <b>Mean</b> | <b>SD</b> |                    |
| <b>ART Duration (year)</b>                            | 4.0         | 2.4       | 3.3         | 2.1       | 3.5         | 2.2       | <0.01 <sup>¶</sup> |
| <b>CD4 cell count</b>                                 | 312.5       | 220.6     | 289.2       | 213.4     | 294.7       | 215.2     | 0.08 <sup>¶</sup>  |
| <b>ART adherence (VAS)</b>                            | 94.8        | 8.2       | 93.9        | 11        | 94.1        | 10.4      | 0.55 <sup>¶</sup>  |

Significance level was  $p < 0.05$

<sup>†</sup>Chi-square test

<sup>¶</sup>Mann Whitney test

### Self-reported health status

The percentage of urban participants reported having any problem in mobility, self-care, doing usual activities were significantly higher than those of rural participants ( $p < 0.01$ ) (**Table 3**). About 40% of the participants reported suffering from anxiety or depression, and about half of the participants reported suffering from pain or discomfort, with no significant difference between rural and urban participants. The mean EQ-5D-5L index was 0.8 (SD=0.2) and the perceived EQ-VAS score among rural participants was statistically significantly higher than those of urban participants ( $p < 0.01$ ).

**Table 3: Health status among participants (n=1133)**

|                                      | Rural |      | Urban |      | Total |      | p-value            |
|--------------------------------------|-------|------|-------|------|-------|------|--------------------|
|                                      | n     | %    | n     | %    | n     | %    |                    |
| <b>Self-reported health problems</b> |       |      |       |      |       |      |                    |
| Mobility                             | 33    | 12.8 | 199   | 22.7 | 232   | 20.5 | <0.01 <sup>†</sup> |
| Self-care                            | 12    | 4.7  | 98    | 11.2 | 110   | 9.7  | <0.01 <sup>†</sup> |
| Usual Activities                     | 26    | 10.1 | 162   | 18.5 | 188   | 16.6 | <0.01 <sup>†</sup> |
| Pain or Discomfort                   | 85    | 33.0 | 342   | 39.1 | 427   | 37.7 | 0.07 <sup>†</sup>  |
| Anxiety or Depression                | 104   | 40.3 | 405   | 46.3 | 509   | 44.9 | 0.09 <sup>†</sup>  |
| <b>Complications and</b>             | 76    | 29.5 | 329   | 37.6 | 405   | 35.8 | 0.02 <sup>†</sup>  |

|                           | Rural       |           | Urban       |           | Total       |           | p-value             |
|---------------------------|-------------|-----------|-------------|-----------|-------------|-----------|---------------------|
|                           | n           | %         | n           | %         | n           | %         |                     |
| <b>concurrent disease</b> |             |           |             |           |             |           |                     |
|                           | <b>Mean</b> | <b>SD</b> | <b>Mean</b> | <b>SD</b> | <b>Mean</b> | <b>SD</b> |                     |
| <b>EQ-5D-5L index</b>     | 0.8         | 0.2       | 0.8         | 0.3       | 0.8         | 0.2       | 0.18 <sup>†</sup>   |
| <b>EQ-VAS</b>             | 70.1        | 16.0      | 68.4        | 17.6      | 68.8        | 17.3      | <0.01 <sup>††</sup> |

Significance level was  $p < 0.05$

<sup>†</sup>Chi-square test

<sup>††</sup>Mann Whitney test

### Physical activity level

**Table 4** shows that 16% percent of the participants were inactive and 68% of participants were HEPA active using the IPAQ. Rural participants reported a statistically higher level of physical activity and IPAQ score compared to urban participants ( $p=0.03$  and  $p<0.01$  respectively). In term of moderate activity, the number of days per week and the mean value of MET-scores from participants living in rural areas were higher than those in urban areas ( $p<0.01$  and  $p=0.01$  respectively). However, the mean MET-scores of vigorous activity and walking activity were similar between two groups.

**Table 4: Physical activity levels of participants**

|                                   | Rural       |           | Urban       |           | Total       |           | p-value                      |
|-----------------------------------|-------------|-----------|-------------|-----------|-------------|-----------|------------------------------|
|                                   | n           | %         | n           | %         | n           | %         |                              |
| <b>Level of physical activity</b> |             |           |             |           |             |           |                              |
| Inactive                          | 29          | 11.3      | 152         | 17.4      | 181         | 16.0      | <b>0.03<sup>†</sup></b>      |
| Minimally active                  | 37          | 14.3      | 144         | 16.4      | 181         | 16.0      |                              |
| HEPA active                       | 192         | 74.4      | 579         | 66.2      | 771         | 68.0      |                              |
|                                   | <b>Mean</b> | <b>SD</b> | <b>Mean</b> | <b>SD</b> | <b>Mean</b> | <b>SD</b> |                              |
| <b>Vigorous activity</b>          |             |           |             |           |             |           |                              |
| Days per week                     | 1.5         | 0.2       | 1.2         | 0.1       | 1.3         | 2.5       | 0.09 <sup>††</sup>           |
| Minutes per day                   | 95.4        | 11.2      | 81.1        | 6         | 84.4        | 177.6     | 0.15 <sup>††</sup>           |
| MET-score                         | 4360.9      | 555.5     | 3444.4      | 282.5     | 3651.9      | 8465.9    | 0.11 <sup>††</sup>           |
| <b>Moderate activity</b>          |             |           |             |           |             |           |                              |
| Days per week                     | 5.4         | 0.2       | 4.8         | 0.1       | 4.9         | 2.8       | <b>&lt;0.01<sup>††</sup></b> |
| Minutes per day                   | 170.2       | 5.7       | 155.9       | 3.3       | 159.1       | 96        | 0.04 <sup>††</sup>           |
| MET-score                         | 4211.3      | 165.7     | 3737.9      | 92.2      | 3845.9      | 2711.1    | <b>0.01<sup>††</sup></b>     |
| <b>Walking activity</b>           |             |           |             |           |             |           |                              |
| Days per week                     | 3.4         | 0.2       | 3.3         | 0.1       | 3.4         | 3.3       | 0.67 <sup>††</sup>           |
| Minutes per day                   | 18.6        | 1.8       | 21.8        | 1.3       | 21.1        | 36.8      | 0.99 <sup>††</sup>           |
| MET-score                         | 377.1       | 38.3      | 451.5       | 29.3      | 434.6       | 816.3     | 0.87 <sup>††</sup>           |
| <b>IPAQ Score</b>                 | 8977.9      | 535.5     | 7613.5      | 280.5     | 7922.9      | 8333.8    | <b>&lt;0.01<sup>††</sup></b> |

Number of total participants,  $n = 1133$

Significance level was  $p < 0.05$

<sup>†</sup>Chi-square test and

<sup>††</sup>Mann Whitney test

IPAQ score was also found to be differentially associated with ART treatment duration (**Figure 1**). A higher IPAQ score was associated with a shorter antiretroviral therapy (ART) duration, and longer antiretroviral therapy (ART) treatment was associated with a lower IPAQ score. Specifically, the score increased within the first year of ART, plateaued during 2 to 4 years of treatment, and then decreased.

### Factors associated with level of activity

**Table 5** illustrates that participants were more likely to have a higher IPAQ-score and classified as physically active if they were female, self-employed, blue-collar workers or farmers. Participants who had a higher CD4 cell count, who shared their health status with their peers, and who reported a higher EQ-5D-5L index/EQ-VAS were also more likely to have higher IPAQ score or be physically active. By contrast, a participant with a lower IPAQ-score was associated with living in an urban area and being at the symptomatic stage. In addition, participants who had poor adherence and higher duration of ART were more likely to be physically inactive.

**Table 5: Factors associated with levels of physical activity among antiretroviral therapy patients in Vietnam in 2013**

|                                                                   | IPAQ-score |              | Active |             |
|-------------------------------------------------------------------|------------|--------------|--------|-------------|
|                                                                   | Coef.      | 95 CI        | OR     | 95 CI       |
| <b>Gender (Female vs Male)</b>                                    | 0.25*      | 0.11; 0.39   | 2.53*  | 1.58; 4.07  |
| <b>Living location (Urban vs Rural)</b>                           | -0.17*     | -0.34; -0.01 | 0.60   | 0.35; 1.05  |
| <b>Education attainment (vs Illiterate)</b>                       |            |              |        |             |
| High school                                                       |            |              | 1.52   | 0.94; 2.46  |
| <b>Religion (vs Cults of Ancestor)</b>                            |            |              |        |             |
| Buddhism                                                          |            |              | 2.78   | 0.73; 10.57 |
| <b>Occupation (vs Unemployed)</b>                                 |            |              |        |             |
| Self-employed                                                     | 0.60*      | 0.41; 0.79   | 2.98*  | 1.78; 4.99  |
| White-collar workers                                              | 0.29       | -0.02; 0.59  | 2.43   | 0.87; 6.79  |
| Blue-collar worker/farmers                                        | 0.73*      | 0.52; 0.94   | 2.24*  | 1.27; 3.95  |
| Others                                                            | 0.53*      | 0.22; 0.84   | 3.28*  | 1.07; 10.05 |
| <b>EQ-5D index</b>                                                |            |              | 4.49*  | 1.68; 12.02 |
| <b>EQ-VAS</b>                                                     | 0.01*      | 0.00; 0.01   | 1.02*  | 1.00; 1.03  |
| <b>Current CD4 cell count</b>                                     | 0.01*      | 0.00; 0.01   | 1.02*  | 1.01; 1.03  |
| <b>ART duration</b>                                               |            |              | 0.91*  | 0.82; 0.98  |
| <b>HIV Stages (vs Asymptomatic)</b>                               |            |              |        |             |
| Symptomatic                                                       | -0.20*     | -0.38; -0.01 |        |             |
| AIDS                                                              |            |              | 1.81   | 0.87; 3.79  |
| <b>Forgetting to take medicine in the last 4 days (Yes vs No)</b> |            |              | 0.26*  | 0.09; 0.80  |
| <b>Share health status with peers (Yes vs No)</b>                 | 0.26*      | 0.12; 0.40   | 1.86*  | 1.21; 2.84  |

\* $p < 0.05$ ; OR: Odds Ratio; 95% CI: 95% Confidence Interval

### Discussion



1  
2  
3 Findings of this study suggest that PLWH in urban areas reported a lower level of  
4 physical activity compared to their peer in rural settings. In our study, a majority of  
5 ART patients achieved HEPA active in physical activity. By using multivariate  
6 regression models, we found a number of sociodemographic, clinical and social  
7 factors that are associated with the level of physical activity among PLWH in  
8 Vietnam. These results could contribute significantly to the development of  
9 interventions aimed to boost the level of physical activity among this population in  
10 the future.  
11

12 Compared to previous studies on ART patients using the IPAQ system, the  
13 percentage of inactive (16%) or minimally active (16%) participants in our study was  
14 much lower<sup>12 27 29 30</sup>. Most participants reported the highest frequency of moderate  
15 activity (playing sport, cycling, cradling baby, etc.), which was different from previous  
16 studies' findings that walking was the most preferred physical activity among PLWH  
17<sup>14 30</sup>. These activities can have a positive effect on PLWH by decreasing the side-  
18 effects associated with HIV/AIDS and cardio-metabolic complications accompanied  
19 with ART treatment<sup>15 49</sup>. However, a number of participants in our study reported  
20 having difficulty in mobility which limited their ability to engage in healthy physical  
21 activities regardless of living location. With this information, health staff could provide  
22 alternative methods of exercising such as passive motion exercise, hydrotherapy or  
23 stationary cycling which is found to be just as effective for enhancing functional  
24 fitness as active exercise practice<sup>50</sup>.  
25  
26

27 The total physical activity score in rural areas was higher than the score in urban  
28 areas in our study, which is consistent with the physical activity level of the general  
29 Vietnamese population<sup>35</sup>. There are certain environmental factors in rural areas  
30 such as the condition of sidewalks, the availability of exercise equipment and the  
31 sedentary behavior in urbanize setting may affect individual's willingness to  
32 participate in physical activity<sup>37 51</sup>. At the same time, in Vietnam, the main  
33 occupations in rural areas are farming and blue-collar works, in which the rural  
34 participants often consider working on the farm or in heavy working conditions as  
35 vigorous and moderate physical activities. However, MET-score obtaining by walking  
36 activity indicated that this was the least performed physical activity and this did not  
37 differ between rural and urban areas. This can be due to factors such as low  
38 residential density and long distances between destinations in rural areas that may  
39 discourage people from walking<sup>52</sup>. Similarly, in urban settings, walking intensity  
40 could be influenced by the presence or lack of pedestrian infrastructure such as  
41 sidewalk as well as safety concerns from crime or traffic flow<sup>53</sup>.  
42  
43  
44

45 Our study also found that participants who were unemployed were less likely to be  
46 physically active, which concurs with prior findings<sup>54 55</sup>. Unemployed patients are  
47 less likely to obtain adequate physical activity because an occupational activity is  
48 likely to be included as a component of daily physical activity in adulthood<sup>56-58</sup>.  
49 In addition, our study found that female participants were more likely to get a higher  
50 level of physical activity. This can be explained by the fact that in the traditional  
51 Vietnamese culture, women still have many responsibilities requiring physical  
52 movements such as taking care of their children and all household activities, which  
53 were mainly classified as moderate physical activity in our study<sup>59 60</sup>.  
54  
55  
56  
57  
58  
59  
60

1  
2  
3 Interestingly, we found that people who reported a higher duration of ART were less  
4 likely to be physically active. Notably, this association was found in a non-linear  
5 relationship. This is likely because these patients may have had to adapt to a  
6 rigorous adherence at the initiation of their treatment, which might have promoted  
7 their willingness to involve in physical activities<sup>45 61 62</sup>. However, they might become  
8 more complacent when their health status recovered in the latter stages, and less  
9 motivated to comply to any strict physical regimen<sup>45 61</sup>. Findings from another study  
10 emphasized the role of age in the relationships between the advanced stages HIV  
11 disease and worsen physical function<sup>24</sup>. As prolonged ART treatment has been  
12 positively associated with an accelerated aging process, age-related comorbidity  
13 may reduce the patient's level of physical activity intensity<sup>24</sup>. However, in this study,  
14 the influence of age to the level of physical activity was not statistically significant  
15 since it was dropped out of multivariate regression model. We also observed that  
16 non-adherence to ART was associated with a physically inactive status. Other  
17 studies also revealed that a low level of physical activity has been found to be  
18 significantly related to a low antiretroviral medication adherence<sup>61 63</sup>. This finding  
19 can be explained by the fact that engaging in physical activity can reduce depressive  
20 symptomatology which may lead to a more optimal ART adherence<sup>63</sup>.

21  
22  
23 In this study, we combined both EQ-5D-5L and EQ-VAS instruments due to the  
24 variation of health utility scores based on different instruments<sup>64</sup>. EQ-VAS is a self-  
25 reported instrument that directly assesses the perceived health status of patients in  
26 the short-term. Meanwhile, the EQ-5D index is composited by five domains that  
27 indirectly measures the quality of life in the long-term<sup>65</sup>. In the short-term, the  
28 patient's hope for improving their health condition might influence their perceived  
29 health status. On the other hand, in the long-term, because of the acclimation with  
30 their health status, the patient tends to report quality of life more accurately<sup>64</sup>. In  
31 term of health status, participants who reported a higher quality of life and a higher  
32 number of CD4 cell count also had a higher IPAQ score, while participants at  
33 symptomatic stage had a lower IPAQ score compared to those at the asymptomatic  
34 stage. We supposed that engaging in physical activity would help patients improve  
35 and maintain their strength and quality of life. Two systemic reviews by O'Brien et al.  
36 in 2016 and 2017 found that exercises including aerobic and resistive or a  
37 combination of both performed at least three times per week for at least five weeks  
38 may lead to improvements in cardiopulmonary fitness, strength, weight and body  
39 composition and quality of life among PLWH who are medically stable.<sup>66 67</sup>

40  
41  
42  
43 Our current study suggested that participants who shared their health status with  
44 their peers were more likely to have higher IPAQ scores. The association between  
45 peer supports and physical activity was investigated by Jerome et al (2012) which  
46 found that peer support was an important determinant to assist patients in adherence  
47 to exercise programs<sup>68</sup>. Additionally, WHO, PEPFAR, and Global Fund have  
48 proposed that social support should be considered as an effective adjunct in  
49 improving physical health among PLWH receiving ART treatment<sup>69 70</sup>. As PLWH  
50 were more vulnerable and withdrawn from social situations<sup>71</sup>, peer support can have  
51 a positive effect on patients' health through sharing relevant personal experiences to  
52 acquire knowledge, reduce stigma and discrimination, improve physical functioning,  
53 and enhance retention in ART treatment<sup>72-74</sup>.

1  
2  
3 Several implications can be drawn from this study. First, providing different physical  
4 activity strategies based on rural and urban settings is necessary to improve the  
5 health status of PLWH in these areas. For example, health staff in urban clinics may  
6 organize some outdoor activities via peer educators/groups to engage urban patients  
7 in physical activity. Second, job opportunities and vocational training should be  
8 prioritized to promote physically active among ART patients<sup>54 55</sup>. Third, the reduction  
9 in IPAQ score observed in prolonged ART duration suggests that physical health  
10 assessments and appropriate physical activity programs such as resistance training  
11 and aerobic exercises should be in place. Additionally, passive motion exercises  
12 should be considered for immobilized patients or those who had difficulty in mobility  
13 or physical impairments<sup>50</sup>. Fourth, given the association between the level of  
14 physical activity and ART treatment status from our findings, integrative intervention  
15 including physical activity, ART medication adherence and health-related quality of  
16 life may prove to be efficient and cost-effective<sup>63</sup>. Finally, programs promoting social  
17 support, especially among peers should be prioritized to enable HIV patients to  
18 share their experiences that motivate others to be involved in physical activity<sup>68</sup>.  
19 Furthermore, peer support groups integration into assigned health facilities would be  
20 useful to patients who are at the initial ART medication stage.  
21  
22

23 The strengths of this study included the large sample size of HIV-infected patients  
24 receiving antiretroviral therapy treatment, which increased the statistic power of the  
25 result. Additionally, we recruited participants from different levels of the health  
26 systems (central, provincial and district ART clinics) in both rural and urban areas,  
27 which made the sample more representative of the general Vietnamese population.  
28 We also employed international instruments such as IPAQ and EQ-5D-5L, which  
29 would help increase the comparability between our results and other global studies.  
30  
31

32 However, several limitations should be acknowledged. First, a convenience sampling  
33 technique was used, which may limit the generalizability of our findings to other  
34 settings and patient populations. Second, because collected data were based on  
35 self-reported information, it is susceptible to be influenced by interviewers, social  
36 desirability and recall bias. To minimize these biases, interviewers affiliated with  
37 selected health centers were excluded from the study and patients were given clear  
38 instructions on the benefits and drawbacks of the study. Thirdly, the causal  
39 inferences could not be established due to the cross-sectional design. Finally, some  
40 barriers to physically active such as social factors (stigma, discrimination), family  
41 support or clinical settings (healthcare providers) were not fully addressed in this  
42 study, warranting further research to elucidate these gaps.  
43  
44

## 45 **Conclusion**

46 In conclusion, findings from this study provided many suggestions for potential health  
47 behavior interventions to improve the level of physical activity for HIV patients  
48 receiving ART in rural and urban Vietnam. Health care providers should consider  
49 developing peer support and job guidance programs for PLWH as they have great  
50 potentials to increase PLWH's level of physical activity, quality of life, and overall  
51 health status. Furthermore, future studies of a similar population in different settings  
52 (coastal, mountainside, ect) are needed to confirm the positive association between  
53 high level of physical activity and ART adherence.  
54  
55  
56  
57  
58  
59  
60

1  
2  
3  
4  
5  
6  
7  
8  
9  
10  
11  
12  
13  
14  
15  
16  
17  
18  
19  
20  
21  
22  
23  
24  
25  
26  
27  
28  
29  
30  
31  
32  
33  
34  
35  
36  
37  
38  
39  
40  
41  
42  
43  
44  
45  
46  
47  
48  
49  
50  
51  
52  
53  
54  
55  
56  
57  
58  
59  
60

For peer review only

## LIST OF ABBREVIATION

ART: Antiretroviral Therapy

PLWH: People Living With HIV

WHO: World Health Organization

PEPFAR: President's Emergency Plan for AIDS Relief

## ACKNOWLEDGEMENTS

The authors would like to acknowledge supports by the Vietnam Authority of HIV/AIDS Control and Hanoi Provincial AIDS Centers for the acceptance to implement the study. There was no funding for this analysis.

### Funding

There was no funding for this analysis

### Authors' Contributions

AKD, LHN, AQN, BXT, TTT, CAL, MWBZ, RCMH conceived of the study, and participated in its design and implementation and wrote the manuscript. AKD, LHN, BXT, analysed the data. All authors read and approved the final manuscript.

### Competing interests

The authors declare that they have no competing interests.

### Data sharing statement

The data that support the findings of this study are available from the Vietnam Authority of HIV/AIDS Control but restrictions apply to the availability of these data, which were used under license for the current study, and so are not publicly available. Data are however available from the authors upon reasonable request and with permission of the Vietnam Authority of HIV/AIDS Control.

## References

1. UNAIDS. Global AIDS Update 2016, 2016.
2. Grossman HA, Sullivan PS, Wu AW. Quality of life and HIV: current assessment tools and future directions for clinical practice. *AIDS Read* 2003;13(12):583-90, 95-7.
3. Saves M, Raffi F, Capeau J, et al. Factors related to lipodystrophy and metabolic alterations in patients with human immunodeficiency virus infection receiving highly active antiretroviral therapy. *Clin Infect Dis* 2002;34(10):1396-405. doi: 10.1086/339866
4. Carr A, Cooper DA. Adverse effects of antiretroviral therapy. *The Lancet* 2000;356(9239):1423-30. doi: [http://dx.doi.org/10.1016/S0140-6736\(00\)02854-3](http://dx.doi.org/10.1016/S0140-6736(00)02854-3)
5. Montessori V, Press N, Harris M, et al. Adverse effects of antiretroviral therapy for HIV infection. *CMAJ* 2004;170(2):229-38.
6. Mutimura E, Stewart A, Rheeder P, et al. Metabolic function and the prevalence of lipodystrophy in a population of HIV-infected African subjects receiving highly active antiretroviral therapy. *J Acquir Immune Defic Syndr* 2007;46(4):451-5.
7. Potthoff A, Brockmeyer NH, Gelbrich G, et al. Lipodystrophy - a sign for metabolic syndrome in patients of the HIV-HEART study. *J Dtsch Dermatol Ges* 2010;8(2):92-8. doi: 10.1111/j.1610-0387.2009.07330.x
8. O'Brien ME, Clark RA, Besch CL, et al. Patterns and correlates of discontinuation of the initial HAART regimen in an urban outpatient cohort. *J Acquir Immune Defic Syndr* 2003;34(4):407-14.
9. Gebrezgabher BB, Kebede Y, Kindie M, et al. Determinants to antiretroviral treatment non-adherence among adult HIV/AIDS patients in northern Ethiopia. *AIDS Research and Therapy* 2017;14(1):16. doi: 10.1186/s12981-017-0143-1
10. Wilson EM, Sereti I. Immune restoration after antiretroviral therapy: the pitfalls of hasty or incomplete repairs. *Immunol Rev* 2013;254(1):343-54. doi: 10.1111/imr.12064
11. Bradley H, Mattson CL, Beer L, et al. Increased antiretroviral therapy prescription and HIV viral suppression among persons receiving clinical care for HIV infection. *AIDS* 2016;30(13):2117-24. doi: 10.1097/QAD.0000000000001164
12. Segatto AFM, Freitas Junior IF, Santos VRd, et al. Lipodystrophy in HIV/AIDS patients with different levels of physical activity while on antiretroviral therapy. *Revista da Sociedade Brasileira de Medicina Tropical* 2011;44:420-24.
13. Caspersen CJ, Powell KE, Christenson GM. Physical activity, exercise, and physical fitness: definitions and distinctions for health-related research. *Public Health Rep* 1985;100(2):126-31.
14. Clingerman EM. Participation in physical activity by persons living with HIV disease. *J Assoc Nurses AIDS Care* 2003;14(5):59-70. doi: 10.1177/1055329003255284
15. Hand GA, Lyerly GW, Jagers JR, et al. Impact of Aerobic and Resistance Exercise on the Health of HIV-Infected Persons. *Am J Lifestyle Med* 2009;3(6):489-99. doi: 10.1177/1559827609342198
16. Rowland TW. The role of physical activity and fitness in children in the prevention of adult cardiovascular disease. *Prog Pediatr Cardiol* 2001;12(2):199-203.
17. Warburton DE, Glendhill N, Quinney A. The effects of changes in musculoskeletal fitness on health. *Can J Appl Physiol* 2001;26(2):161-216.
18. Buttar HS, Li T, Ravi N. Prevention of cardiovascular diseases: Role of exercise, dietary interventions, obesity and smoking cessation. *Exp Clin Cardiol* 2005;10(4):229-49.
19. Boule NG, Haddad E, Kenny GP, et al. Effects of exercise on glycemic control and body mass in type 2 diabetes mellitus: a meta-analysis of controlled clinical trials. *Jama* 2001;286(10):1218-27.
20. Kruk J. Physical activity in the prevention of the most frequent chronic diseases: an analysis of the recent evidence. *Asian Pacific journal of cancer prevention : APJCP* 2007;8(3):325-38.

- 1
- 2
- 3 21. Lynch BM, Neilson HK, Friedenreich CM. Physical activity and breast cancer prevention. *Recent*
- 4 *Results Cancer Res* 2011;186:13-42. doi: 10.1007/978-3-642-04231-7\_2
- 5 22. Mendes EL, Ribeiro Andaki AC, Brito CJ, et al. Beneficial effects of physical activity in an HIV-
- 6 infected woman with lipodystrophy: a case report. *J Med Case Rep* 2011;5:430. doi:
- 7 10.1186/1752-1947-5-430
- 8 23. Roubenoff R, Schmitz H, Bairos L, et al. Reduction of Abdominal Obesity in Lipodystrophy
- 9 Associated with Human Immunodeficiency Virus Infection by Means of Diet and Exercise:
- 10 Case Report and Proof of Principle. *Clinical Infectious Diseases* 2002;34(3):390-93. doi:
- 11 10.1086/338402
- 12 24. Oursler KK, Goulet JL, Crystal S, et al. Association of age and comorbidity with physical function in
- 13 HIV-infected and uninfected patients: results from the Veterans Aging Cohort Study. *AIDS*
- 14 *patient care and STDs* 2011;25(1):13-20. doi: 10.1089/apc.2010.0242
- 15 25. World Health Organization. Global recommendations on physical activity for health. Geneva,
- 16 Switzerland: World Health Organization, 2011.
- 17 26. Center for Disease Control and Prevention. Act Against AIDS: Physical Activity Atlanta, The United
- 18 States of America 2017 [Available from:
- 19 [https://www.cdc.gov/actagainststids/campaigns/hivtreatmentworks/livewell/physical.h](https://www.cdc.gov/actagainststids/campaigns/hivtreatmentworks/livewell/physical.html)
- 20 [tml](https://www.cdc.gov/actagainststids/campaigns/hivtreatmentworks/livewell/physical.html) accessed 13-11-2017.
- 21 27. Frantz JM, Murenzi A. The physical activity levels among people living with human
- 22 immunodeficiency virus/acquired immunodeficiency syndrome receiving high active
- 23 antiretroviral therapy in Rwanda. *SAHARA-J: Journal of Social Aspects of HIV/AIDS* 2013;10(3-
- 24 4):113-18.
- 25 28. Trevisol F, Alencastro P, Ribeiro P, et al. Association of physical activity with lipodystrophy
- 26 syndrome in HIV-infected patients. *J AIDS Clinic Res* 2012;3(8):1.
- 27 29. Monroe AK, Brown TT, Cox C, et al. Physical Activity and Its Association with Insulin Resistance in
- 28 Multicenter AIDS Cohort Study Men. *AIDS Res Hum Retroviruses* 2015;31(12):1250-6. doi:
- 29 10.1089/aid.2015.0027
- 30 30. Fillipas S, Bowtell-Harris CA, Oldmeadow LB, et al. Physical activity uptake in patients with HIV:
- 31 who does how much? *International journal of STD & AIDS* 2008;19(8):514-8. doi:
- 32 10.1258/ijsa.2007.007237 [published Online First: 2008/07/30]
- 33 31. Trang NH, Hong TK, HP VDP, et al. Longitudinal physical activity changes in adolescents: Ho Chi
- 34 Minh City Youth Cohort. *Med Sci Sports Exerc* 2012;44(8):1481-9. doi:
- 35 10.1249/MSS.0b013e31824e50dc
- 36 32. Trang NH, Hong TK, Dibley MJ, et al. Factors associated with physical inactivity in adolescents in
- 37 Ho Chi Minh City, Vietnam. *Med Sci Sports Exerc* 2009;41(7):1374-83. doi:
- 38 10.1249/MSS.0b013e31819c0dd3
- 39 33. Tran VD, Lee AH, Jancey J, et al. Community-based physical activity and nutrition programme for
- 40 adults with metabolic syndrome in Vietnam: study protocol for a cluster-randomised
- 41 controlled trial. *BMJ Open* 2016;6(6):e011532. doi: 10.1136/bmjopen-2016-011532
- 42 34. Nguyen TH, Tang HK, Kelly P, et al. Association between physical activity and metabolic
- 43 syndrome: a cross sectional survey in adolescents in Ho Chi Minh City, Vietnam. *BMC Public*
- 44 *Health* 2010;10:141. doi: 10.1186/1471-2458-10-141
- 45 35. Bui TV, Blizzard CL, Luong KN, et al. Physical Activity in Vietnam: Estimates and Measurement
- 46 Issues. *PloS one* 2015;10(10):e0140941. doi: 10.1371/journal.pone.0140941
- 47 36. Rees S, Silove D, Chey T, et al. Physical activity and psychological distress amongst Vietnamese
- 48 living in the Mekong Delta. *Aust N Z J Psychiatry* 2012;46(10):966-71. doi:
- 49 10.1177/0004867412459568
- 50 37. Minh HV, Byass P, Wall S. Mortality from cardiovascular diseases in Bavi District, Vietnam. *Scand*
- 51 *J Public Health Suppl* 2003;62:26-31.
- 52
- 53
- 54
- 55
- 56
- 57
- 58
- 59
- 60

- 1
- 2
- 3 38. Bui TV, Blizzard CL, Luong KN, et al. National survey of risk factors for non-communicable disease
- 4 in Vietnam: prevalence estimates and an assessment of their validity. *BMC Public Health*
- 5 2016;16 doi: 10.1186/s12889-016-3160-4
- 6 39. Service UFA. Vietnam retails food sector report 2016. Hanoi, Vietnam: USDA Foreign Agriculture
- 7 Service, 2016.
- 8 40. UNAIDS. Antiretroviral therapy coverage (% of people living with HIV), 2017.
- 9 41. National Assembly. Constitution of the Socialist Republic of Vietnam: National Assembly, 2013.
- 10 42. Vietnam Ministry of Health. Decision No 3003/QD-BYT on issuing "Guideline for HIV diagnosis
- 11 and treatment". 2009
- 12 43. Centers for Disease Control and Prevention. 1993 Revised Classification System for HIV Infection
- 13 and Expanded Surveillance Case Definition for AIDS Among Adolescents and Adults, 1993.
- 14 44. Giordano TP, Guzman D, Clark R, et al. Measuring Adherence to Antiretroviral Therapy in a
- 15 Diverse Population Using a Visual Analogue Scale. *HIV Clinical Trials* 2004;5(2):74-79. doi:
- 16 10.1310/JFXH-G3X2-EYM6-D6UG
- 17 45. Tran BX, Nguyen LT, Nguyen NH, et al. Determinants of antiretroviral treatment adherence
- 18 among HIV/AIDS patients: a multisite study. *Global health action* 2013;6:19570. doi:
- 19 10.3402/gha.v6i0.19570 [published Online First: 2013/03/19]
- 20 46. Tran BX, Ohinmaa A, Nguyen LT. Quality of life profile and psychometric properties of the EQ-5D-
- 21 5L in HIV/AIDS patients. *Health and quality of life outcomes* 2012;10:132. doi: 10.1186/1477-
- 22 7525-10-132
- 23 47. Ternent L MP, Newlands D. Exploring biases in the double bounded dichotomous choice (DBDC)
- 24 and DBDC with open ended follow-up methods. 2010
- 25 48. Guidelines for Data Processing and Analysis of the International Physical Activity Questionnaire
- 26 (IPAQ) - Short Form. 2004
- 27 49. Grace JM, Semple SJ, Combrink S. Exercise therapy for human immunodeficiency virus/AIDS
- 28 patients: Guidelines for clinical exercise therapists. *Journal of Exercise Science & Fitness*
- 29 2015;13(1):49-56. doi: <http://dx.doi.org/10.1016/j.jesf.2014.10.003>
- 30 50. Takahashi T, Takeshima N, Rogers NL, et al. Passive and active exercises are similarly effective in
- 31 elderly nursing home residents. *J Phys Ther Sci* 2015;27(9):2895-900. doi:
- 32 10.1589/jpts.27.2895
- 33 51. Zimmerman LM, Barnason S, Schulz P, et al. Rural Versus Urban Comparison: Physical Activity
- 34 and Functioning Following Coronary Artery Bypass Surgery. *Online J Rural Nurs Health Care*
- 35 2012;12(1):16-28.
- 36 52. Yousefian A, Hennessy E, Umstattd MR, et al. Development of the Rural Active Living Assessment
- 37 Tools: measuring rural environments. *Preventive medicine* 2010;50 Suppl 1:S86-92. doi:
- 38 10.1016/j.ypmed.2009.08.018
- 39 53. Chrisman M, Nothwehr F, Yang G, et al. Environmental influences on physical activity in rural
- 40 Midwestern adults: a qualitative approach. *Health Promot Pract* 2015;16(1):142-8. doi:
- 41 10.1177/1524839914524958
- 42 54. Van Domelen DR, Koster A, Caserotti P, et al. Employment and physical activity in the U.S. *Am J*
- 43 *Prev Med* 2011;41(2):136-45. doi: 10.1016/j.amepre.2011.03.019
- 44 55. Clinger E. Physical activity, social support, and health-related quality of life among persons
- 45 with HIV disease. *Journal of community health nursing* 2004;21(3):179-97. doi:
- 46 10.1207/s15327655jchn2103\_5 [published Online First: 2004/09/25]
- 47 56. Grayson JP. Health, physical activity level, and employment status in Canada. *Int J Health Serv*
- 48 1993;23(4):743-61. doi: 10.2190/W5NR-A7A4-BX4A-T4F7
- 49 57. Lagerros YT, Lagiou P. Assessment of physical activity and energy expenditure in epidemiological
- 50 research of chronic diseases. *Eur J Epidemiol* 2007;22(6):353-62. doi: 10.1007/s10654-007-
- 51 9154-x
- 52
- 53
- 54
- 55
- 56
- 57
- 58
- 59
- 60



- 1  
2  
3 58. Salmon J, Owen N, Bauman A, et al. Leisure-time, occupational, and household physical activity  
4 among professional, skilled, and less-skilled workers and homemakers. *Preventive medicine*  
5 2000;30(3):191-9. doi: 10.1006/pmed.1999.0619 [published Online First: 2000/02/24]  
6 59. Tran BX, Ohinmaa A, Nguyen LT, et al. Gender differences in quality of life outcomes of HIV/AIDS  
7 treatment in the latent feminization of HIV epidemics in Vietnam. *AIDS care*  
8 2012;24(10):1187-96. doi: 10.1080/09540121.2012.658752  
9 60. Tran BX, Hwang J, Nguyen LH, et al. Impact of Socioeconomic Inequality on Access, Adherence,  
10 and Outcomes of Antiretroviral Treatment Services for People Living with HIV/AIDS in  
11 Vietnam. *PLoS one* 2016;11(12):e0168687. doi: 10.1371/journal.pone.0168687  
12 61. Hansana V, Sanchaisuriya P, Durham J, et al. Adherence to antiretroviral therapy (ART) among  
13 people living with HIV (PLHIV): a cross-sectional survey to measure in Lao PDR. *BMC Public*  
14 *Health* 2013;13:617. doi: 10.1186/1471-2458-13-617  
15 62. Andreo C, Bouhnik AD, Soletti J, et al. [Non-compliance in HIV-infected patients, supported by a  
16 community association]. *Sante Publique* 2001;13(3):249-62.  
17 63. Blashill AJ, Mayer KH, Crane H, et al. Physical activity and health outcomes among HIV-infected  
18 men who have sex with men: a longitudinal mediational analysis. *Ann Behav Med*  
19 2013;46(2):149-56. doi: 10.1007/s12160-013-9489-3  
20 64. Tran BX, Nguyen LH, Ohinmaa A, et al. Longitudinal and cross sectional assessments of health  
21 utility in adults with HIV/AIDS: a systematic review and meta-analysis. *BMC Health Serv Res*  
22 2015;15:7. doi: 10.1186/s12913-014-0640-z  
23 65. Nguyen LH, Nguyen LHT, Boggiano VL, et al. Quality of life and healthcare service utilization  
24 among methadone maintenance patients in a mountainous area of Northern Vietnam.  
25 *Health and quality of life outcomes* 2017;15(1):77. doi: 10.1186/s12955-017-0633-9  
26 66. O'Brien KK, Tynan AM, Nixon SA, et al. Effectiveness of Progressive Resistive Exercise (PRE) in the  
27 context of HIV: systematic review and meta-analysis using the Cochrane Collaboration  
28 protocol. *BMC infectious diseases* 2017;17 doi: 10.1186/s12879-017-2342-8  
29 67. O'Brien KK, Tynan AM, Nixon SA, et al. Effectiveness of aerobic exercise for adults living with HIV:  
30 systematic review and meta-analysis using the Cochrane Collaboration protocol. *BMC*  
31 *infectious diseases* 2016;16 doi: 10.1186/s12879-016-1478-2  
32 68. Jerome GJ, Dalcin AT, Young DR, et al. Rationale, design and baseline data for the Activating  
33 Consumers to Exercise through Peer Support (ACE trial): A randomized controlled trial to  
34 increase fitness among adults with mental illness. *Ment Health Phys Act* 2012;5(2):166-74.  
35 doi: 10.1016/j.mhpa.2012.05.002  
36 69. Harding R, Simms V, Penfold S, et al. Multi-centred mixed-methods PEPFAR HIV care & support  
37 public health evaluation: study protocol. *BMC Public Health* 2010;10:584. doi: 10.1186/1471-  
38 2458-10-584  
39 70. . Consolidated Guidelines on the Use of Antiretroviral Drugs for Treating and Preventing HIV  
40 Infection: Recommendations for a Public Health Approach. 2nd ed. Geneva 2016.  
41 71. Kalichman SC. Understanding AIDS: A guide for mental health professionals: American  
42 Psychological Association 1995.  
43 72. . Peer Support for Diabetes, Heart Disease and HIV/AIDS: A Review of the Clinical Effectiveness,  
44 Cost-effectiveness, and Guidelines. Ottawa (ON) 2013.  
45 73. Peterson JL, Rintamaki LS, Brashers DE, et al. The forms and functions of peer social support for  
46 people living with HIV. *J Assoc Nurses AIDS Care* 2012;23(4):294-305. doi:  
47 10.1016/j.jana.2011.08.014  
48 74. Krebs DW, Chi BH, Mulenga Y, et al. Community-based follow-up for late patients enrolled in a  
49 district-wide programme for antiretroviral therapy in Lusaka, Zambia. *AIDS care*  
50 2008;20(3):311-7. doi: 10.1080/09540120701594776  
51  
52  
53  
54  
55  
56  
57  
58  
59  
60

1  
2  
3 **Figure 1. Physical activity among antiretroviral therapy (ART) patients regarding**  
4 **ART duration.**  
5  
6  
7  
8  
9  
10  
11  
12  
13  
14  
15  
16  
17  
18  
19  
20  
21  
22  
23  
24  
25  
26  
27  
28  
29  
30  
31  
32  
33  
34  
35  
36  
37  
38  
39  
40  
41  
42  
43  
44  
45  
46  
47  
48  
49  
50  
51  
52  
53  
54  
55  
56  
57  
58  
59  
60

For peer review only

1  
2  
3  
4  
5  
6  
7  
8  
9  
10  
11  
12  
13  
14  
15  
16  
17  
18  
19  
20  
21  
22  
23  
24  
25  
26  
27  
28  
29  
30  
31  
32  
33  
34  
35  
36  
37  
38  
39  
40  
41  
42  
43  
44  
45  
46  
47  
48  
49  
50  
51  
52  
53  
54  
55  
56  
57  
58  
59  
60

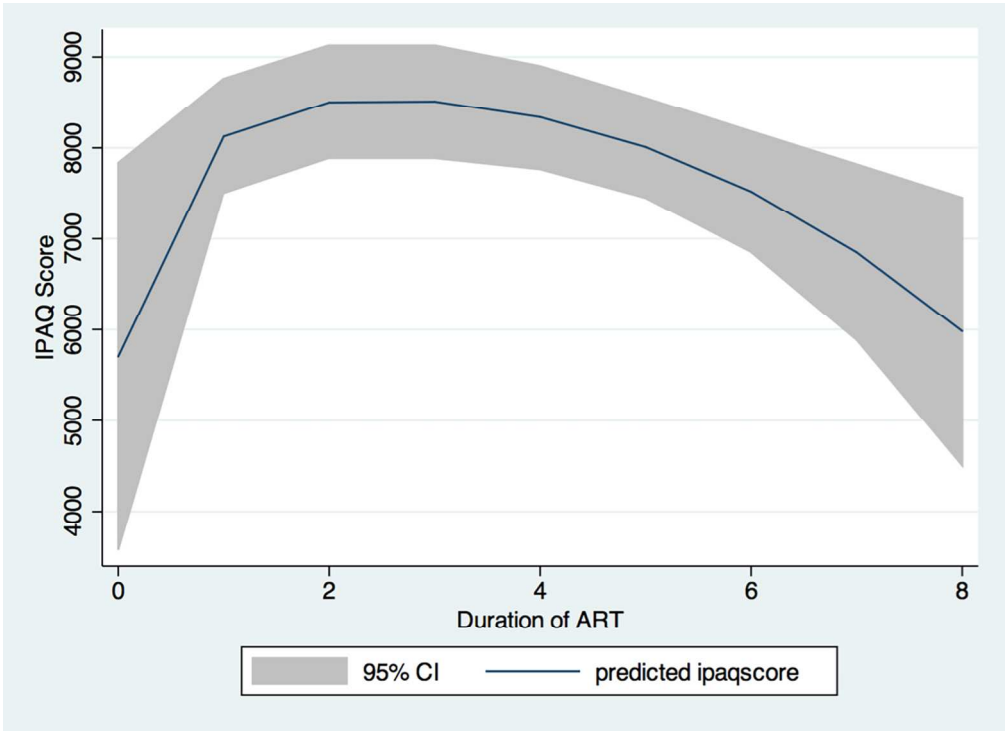

Figure 1. Physical activity among antiretroviral therapy (ART) patients regarding ART duration

137x99mm (300 x 300 DPI)

Pre-view only

## STROBE Statement—checklist of items that should be included in reports of observational studies

|                              | Item No | Page                                                                                                         | Recommendation                                                                                                                                                                             |
|------------------------------|---------|--------------------------------------------------------------------------------------------------------------|--------------------------------------------------------------------------------------------------------------------------------------------------------------------------------------------|
| <b>Title and abstract</b>    | 1       | 1                                                                                                            | (a) Indicate the study's design with a commonly used term in the title or the abstract                                                                                                     |
|                              |         | 2                                                                                                            | (b) Provide in the abstract an informative and balanced summary of what was done and what was found                                                                                        |
| <b>Introduction</b>          |         |                                                                                                              |                                                                                                                                                                                            |
| Background/rationale         | 2       | 4,5                                                                                                          | Explain the scientific background and rationale for the investigation being reported                                                                                                       |
| Objectives                   | 3       | 5                                                                                                            | State specific objectives, including any prespecified hypotheses                                                                                                                           |
| <b>Methods</b>               |         |                                                                                                              |                                                                                                                                                                                            |
| Study design                 | 4       | 5                                                                                                            | Present key elements of study design early in the paper                                                                                                                                    |
| Setting                      | 5       | 5                                                                                                            | Describe the setting, locations, and relevant dates, including periods of recruitment, exposure, follow-up, and data collection                                                            |
| Participants                 | 6       | 5                                                                                                            | (a) <i>Cohort study</i> —Give the eligibility criteria, and the sources and methods of selection of participants. Describe methods of follow-up                                            |
|                              |         |                                                                                                              | <i>Case-control study</i> —Give the eligibility criteria, and the sources and methods of case ascertainment and control selection. Give the rationale for the choice of cases and controls |
|                              |         |                                                                                                              | <i>Cross-sectional study</i> —Give the eligibility criteria, and the sources and methods of selection of participants                                                                      |
| Variables                    | 7       | 6,7                                                                                                          | (b) <i>Cohort study</i> —For matched studies, give matching criteria and number of exposed and unexposed                                                                                   |
|                              |         |                                                                                                              | <i>Case-control study</i> —For matched studies, give matching criteria and the number of controls per case                                                                                 |
|                              |         |                                                                                                              | Clearly define all outcomes, exposures, predictors, potential confounders, and effect modifiers. Give diagnostic criteria, if applicable                                                   |
| Data sources/<br>measurement | 8*      | 6,7                                                                                                          | For each variable of interest, give sources of data and details of methods of assessment (measurement). Describe comparability of assessment methods if there is more than one group       |
| Bias                         | 9       | 7                                                                                                            | Describe any efforts to address potential sources of bias                                                                                                                                  |
| Study size                   | 10      | 6                                                                                                            | Explain how the study size was arrived at                                                                                                                                                  |
| Quantitative variables       | 11      | 6,7                                                                                                          | Explain how quantitative variables were handled in the analyses. If applicable, describe which groupings were chosen and why                                                               |
| Statistical methods          | 2       | 7                                                                                                            | (a) Describe all statistical methods, including those used to control for confounding                                                                                                      |
|                              |         | 7                                                                                                            | (b) Describe any methods used to examine subgroups and interactions                                                                                                                        |
|                              |         | 7                                                                                                            | (c) Explain how missing data were addressed                                                                                                                                                |
|                              |         |                                                                                                              | (d) <i>Cohort study</i> —If applicable, explain how loss to follow-up was addressed                                                                                                        |
|                              |         |                                                                                                              | <i>Case-control study</i> —If applicable, explain how matching of cases and controls was addressed                                                                                         |
|                              |         | <i>Cross-sectional study</i> —If applicable, describe analytical methods taking account of sampling strategy |                                                                                                                                                                                            |
|                              |         | (e) Describe any sensitivity analyses                                                                        |                                                                                                                                                                                            |

|                          | Item No | Page       | Recommendation                                                                                                                                                                                                                                                                                                                                                                                                |
|--------------------------|---------|------------|---------------------------------------------------------------------------------------------------------------------------------------------------------------------------------------------------------------------------------------------------------------------------------------------------------------------------------------------------------------------------------------------------------------|
| <b>Results</b>           |         |            |                                                                                                                                                                                                                                                                                                                                                                                                               |
| Participants             | 13*     | 8          | (a) Report numbers of individuals at each stage of study—eg numbers potentially eligible, examined for eligibility, confirmed eligible, included in the study, completing follow-up, and analysed<br>(b) Give reasons for non-participation at each stage<br>(c) Consider use of a flow diagram                                                                                                               |
| Descriptive data         | 14*     | 8-11       | (a) Give characteristics of study participants (eg demographic, clinical, social) and information on exposures and potential confounders                                                                                                                                                                                                                                                                      |
|                          |         | 7          | (b) Indicate number of participants with missing data for each variable of interest                                                                                                                                                                                                                                                                                                                           |
|                          |         |            | (c) <i>Cohort study</i> —Summarise follow-up time (eg, average and total amount)                                                                                                                                                                                                                                                                                                                              |
| Outcome data             | 15*     |            | <i>Cohort study</i> —Report numbers of outcome events or summary measures over time                                                                                                                                                                                                                                                                                                                           |
|                          |         |            | <i>Case-control study</i> —Report numbers in each exposure category, or summary measures of exposure                                                                                                                                                                                                                                                                                                          |
|                          |         | 7          | <i>Cross-sectional study</i> —Report numbers of outcome events or summary measures                                                                                                                                                                                                                                                                                                                            |
| Main results             | 16      | 7, 8,9,10  | (a) Give unadjusted estimates and, if applicable, confounder-adjusted estimates and their precision (eg, 95% confidence interval). Make clear which confounders were adjusted for and why they were included<br>(b) Report category boundaries when continuous variables were categorized<br>(c) If relevant, consider translating estimates of relative risk into absolute risk for a meaningful time period |
|                          |         |            |                                                                                                                                                                                                                                                                                                                                                                                                               |
|                          |         |            |                                                                                                                                                                                                                                                                                                                                                                                                               |
| Other analyses           | 17      |            | Report other analyses done—eg analyses of subgroups and interactions, and sensitivity analyses                                                                                                                                                                                                                                                                                                                |
| <b>Discussion</b>        |         |            |                                                                                                                                                                                                                                                                                                                                                                                                               |
| Key results              | 18      | 9          | Summarise key results with reference to study objectives                                                                                                                                                                                                                                                                                                                                                      |
| Limitations              | 19      | 14         | Discuss limitations of the study, taking into account sources of potential bias or imprecision. Discuss both direction and magnitude of any potential bias                                                                                                                                                                                                                                                    |
| Interpretation           | 20      | 12, 13, 14 | Give a cautious overall interpretation of results considering objectives, limitations, multiplicity of analyses, results from similar studies, and other relevant evidence                                                                                                                                                                                                                                    |
| Generalisability         | 21      | 14         | Discuss the generalisability (external validity) of the study results                                                                                                                                                                                                                                                                                                                                         |
| <b>Other information</b> |         |            |                                                                                                                                                                                                                                                                                                                                                                                                               |
| Funding                  | 22      | none       | Give the source of funding and the role of the funders for the present study and, if applicable, for the original study on which the present article is based                                                                                                                                                                                                                                                 |

\*Give information separately for cases and controls in case-control studies and, if applicable, for exposed and unexposed groups in cohort and cross-sectional studies.

1  
2  
3 **Note:** An Explanation and Elaboration article discusses each checklist item and gives methodological background and  
4 published examples of transparent reporting. The STROBE checklist is best used in conjunction with this article (freely  
5 available on the Web sites of PLoS Medicine at <http://www.plosmedicine.org/>, Annals of Internal Medicine at  
6 <http://www.annals.org/>, and Epidemiology at <http://www.epidem.com/>). Information on the STROBE Initiative is  
7 available at [www.strobe-statement.org](http://www.strobe-statement.org).  
8  
9  
10  
11  
12  
13  
14  
15  
16  
17  
18  
19  
20  
21  
22  
23  
24  
25  
26  
27  
28  
29  
30  
31  
32  
33  
34  
35  
36  
37  
38  
39  
40  
41  
42  
43  
44  
45  
46  
47  
48  
49  
50  
51  
52  
53  
54  
55  
56  
57  
58  
59  
60
